# Supplementary material
Source: PubMed Central journal article supplement (PMC2940476)
Supplement: me.2010-0192_1.pdf [file me.2010-0192_1.pdf]

**Supplementary Table 1. The genes regulated by dexamethasone treatment in the rat liver**

| Gene Name*                                                                                       | Gene Symbol          | Mean         | Median       | p-Value     |
|--------------------------------------------------------------------------------------------------|----------------------|--------------|--------------|-------------|
| RT1 class Ib, locus Aw2                                                                          | RT1-Aw2              | -5.593229642 | -5.593229642 | 5.11E-05    |
| ribonucleotide reductase M2 (mapped)                                                             | Rrm2                 | -5.148483224 | -5.148483224 | 7.84E-06    |
| serine (or cysteine) peptidase inhibitor, clade A (alpha-1 antipeptidase, antitrypsin), member 7 | Serpina7             | -4.338990085 | -4.338990085 | 5.80E-05    |
| similar to indolethylamine N-methyltransferase                                                   | LOC368066            | -3.975678082 | -3.975678082 | 4.10E-05    |
| cyclin-dependent kinase inhibitor 3 (predicted)                                                  | Cdkn3_predicted      | -3.808443113 | -3.808443113 | 1.37E-05    |
| RT1 class Ib gene, H2-TL-like, grc region (N1)                                                   | RT1-N1               | -3.373370936 | -3.373370936 | 7.27E-05    |
| ect2 oncogene (predicted)                                                                        | Ect2_predicted       | -3.350168588 | -3.350168588 | 0.00020606  |
| unknown gene                                                                                     | NA                   | -3.284346975 | -3.284346975 | 8.56E-05    |
| ribonucleotide reductase M2 (mapped)                                                             | Rrm2                 | -3.224176104 | -3.224176104 | 0.000451123 |
| cell division cycle 2 homolog A (S. pombe)                                                       | Cdc2a                | -3.196434398 | -3.196434398 | 1.04E-05    |
| cyclin A2                                                                                        | Ccna2                | -3.193890649 | -3.193890649 | 1.64E-05    |
| integral membrane transport protein UST4r                                                        | UST4r                | -3.075352788 | -3.075352788 | 1.91E-05    |
| unknown gene                                                                                     | NA                   | -3.001627445 | -3.001627445 | 1.98E-05    |
| NS5A (hepatitis C virus) transactivated protein 9                                                | Ns5atp9              | -2.979374866 | -2.979374866 | 1.08E-05    |
| RT1 class Ib, locus Aw2                                                                          | RT1-Aw2              | -2.899160528 | -2.899160528 | 0.000928447 |
| hydroxysteroid (17-beta) dehydrogenase 2                                                         | Hsd17b2              | -2.753479131 | -2.753479131 | 0.000104517 |
| aldehyde dehydrogenase family 1, member A1                                                       | Aldh1a1              | -2.7351609   | -2.7351609   | 2.09E-06    |
| antigen identified by monoclonal antibody Ki-67 (predicted)                                      | Mki67_predicted      | -2.674465871 | -2.674465871 | 0.000406635 |
| ATP-binding cassette, sub-family G (WHITE), member 5                                             | Abcg5                | -2.588780399 | -2.588780399 | 2.29E-05    |
| cyclin B2                                                                                        | Ccnb2                | -2.578176951 | -2.578176951 | 0.00020413  |
| solute carrier organic anion transporter family, member 1a4                                      | Slco1a4              | -2.489216481 | -2.489216481 | 8.28E-06    |
| cyclin D1                                                                                        | Ccnd1                | -2.434073538 | -2.434073538 | 4.31E-05    |
| similar to hypothetical protein MGC37914 (predicted)                                             | RGD1307603_predicted | -2.407491926 | -2.407491926 | 3.40E-06    |
| solute carrier family 17 (sodium phosphate), member 3                                            | Slc17a3              | -2.376576508 | -2.376576508 | 2.61E-06    |
| cyclin B1                                                                                        | Ccnb1                | -2.373163953 | -2.373163953 | 6.56E-05    |
| cyclin B1                                                                                        | Ccnb1                | -2.357115822 | -2.357115822 | 2.80E-05    |
| RT1 class I, CE12                                                                                | RT1-CE12             | -2.280854876 | -2.280854876 | 0.000269075 |
| sulfotransferase family, cytosolic, 1C, member 2                                                 | Sult1c2              | -2.263329132 | -2.263329132 | 7.65E-05    |
| cytoskeleton associated protein 2 (predicted)                                                    | Ckap2_predicted      | -2.214273723 | -2.214273723 | 1.62E-05    |
| solute carrier organic anion transporter family, member 1a4                                      | Slco1a4              | -2.213473927 | -2.213473927 | 1.45E-06    |
| pregnancy-induced growth inhibitor                                                               | Ok138                | -2.196523519 | -2.196523519 | 1.16E-07    |
| solute carrier family 34 (sodium phosphate), member 2                                            | Slc34a2              | -2.173449825 | -2.173449825 | 5.96E-05    |
| budding uninhibited by benzimidazoles 1 homolog (S. cerevisiae) (predicted)                      | Bub1_predicted       | -2.157882186 | -2.157882186 | 3.19E-05    |
| cell division cycle associated 3                                                                 | Cdca3                | -2.153217937 | -2.153217937 | 0.003219246 |
| spindle pole body component 25 homolog (S. cerevisiae)                                           | Spbc25               | -2.145772796 | -2.145772796 | 4.97E-05    |
| kinesin family member 20A (predicted)                                                            | Kif20a_predicted     | -2.133266185 | -2.133266185 | 0.000115375 |
| enoyl-Coenzyme A, hydratase/3-hydroxyacyl Coenzyme A dehydrogenase                               | Ehhadh               | -2.121013069 | -2.121013069 | 1.37E-05    |
| TRAF4 associated factor 1                                                                        | Traf4af1             | -2.099597485 | -2.099597485 | 0.000148375 |
| sulfotransferase family, cytosolic, 1C, member 1                                                 | Sult1c1              | -2.056321635 | -2.056321635 | 5.77E-06    |
| cell division cycle 20 homolog (S. cerevisiae)                                                   | Cdc20                | -2.051310421 | -2.051310421 | 2.92E-05    |
| RT1 class II, locus Bb                                                                           | RT1-Bb               | -2.039373956 | -2.039373956 | 3.18E-05    |
| neuronal regeneration related protein                                                            | Nrep                 | -2.03322068  | -2.03322068  | 1.15E-05    |
| epoxide hydrolase 1, microsomal                                                                  | Ephx1                | -2.032016875 | -2.032016875 | 9.69E-07    |
| lysyl oxidase                                                                                    | Lox                  | -2.023827009 | -2.023827009 | 9.63E-06    |
| dedicator of cytokinesis 11                                                                      | Dock11               | -1.99058609  | -1.99058609  | 0.000107171 |
| ubiquitin-conjugating enzyme E2C (predicted)                                                     | Ube2c_predicted      | -1.988089155 | -1.988089155 | 2.23E-05    |
| similar to paired immunoglobulin-like type 2 receptor alpha                                      | LOC685020            | -1.980933207 | -1.980933207 | 2.07E-05    |
| SH3 and cysteine rich domain 3 (predicted)                                                       | Stac3_predicted      | -1.97840037  | -1.97840037  | 8.49E-07    |
| lysyl oxidase                                                                                    | Lox                  | -1.966225917 | -1.966225917 | 8.77E-07    |
| unknown gene                                                                                     | NA                   | -1.929131819 | -1.929131819 | 7.99E-05    |

|                                                                                                             |                      |              |              |             |
|-------------------------------------------------------------------------------------------------------------|----------------------|--------------|--------------|-------------|
| protein regulator of cytokinesis 1 (predicted)                                                              | Prc1_predicted       | -1.918259773 | -1.918259773 | 0.001580351 |
| DEP domain containing 1a (predicted)                                                                        | Depdc1a_predicted    | -1.884487225 | -1.884487225 | 0.000874673 |
| CD5 antigen-like                                                                                            | Cd5l                 | -1.867246622 | -1.867246622 | 9.46E-06    |
| similar to Ig kappa chain (predicted)                                                                       | RGD1562855_predicted | -1.865135404 | -1.865135404 | 1.01E-07    |
| similar to RIKEN cDNA 6530401L14 gene                                                                       | RGD1309107           | -1.851058012 | -1.851058012 | 8.65E-06    |
| carbonic anhydrase 3                                                                                        | Ca3                  | -1.838987935 | -1.838987935 | 3.10E-05    |
| steroid 5 alpha-reductase 1                                                                                 | Srd5a1               | -1.834833522 | -1.834833522 | 4.49E-05    |
| cyclin D1                                                                                                   | Ccnd1                | -1.832285934 | -1.832285934 | 7.73E-06    |
| chemokine (C-X-C motif) ligand 1                                                                            | Cxcl1                | -1.828157044 | -1.828157044 | 0.000227294 |
| hyaluronan mediated motility receptor (RHAMM)                                                               | Hmmr                 | -1.826975814 | -1.826975814 | 0.000385885 |
| similar to RIKEN cDNA 9230117N10                                                                            | RGD1311155           | -1.81172709  | -1.81172709  | 3.87E-06    |
| fatty acid desaturase 1                                                                                     | Fads1                | -1.81077951  | -1.81077951  | 2.06E-07    |
| sialophorin                                                                                                 | Spn                  | -1.806046611 | -1.806046611 | 0.000482706 |
| DDHD domain containing 1                                                                                    | Ddhd1                | -1.804609368 | -1.804609368 | 0.00010371  |
| claudin 10 (predicted)                                                                                      | Clcn10_predicted     | -1.798465998 | -1.798465998 | 6.85E-05    |
| topoisomerase (DNA) 2 alpha                                                                                 | Top2a                | -1.798139413 | -1.798139413 | 0.00048669  |
| Rac GTPase-activating protein 1 (predicted)                                                                 | Racgap1_predicted    | -1.795893236 | -1.795893236 | 0.000249684 |
| cyclin D1                                                                                                   | Ccnd1                | -1.793195151 | -1.793195151 | 1.59E-05    |
| similar to Shc SH2-domain binding protein 1                                                                 | LOC687121            | -1.780426552 | -1.780426552 | 1.55E-05    |
| unknown gene                                                                                                | NA                   | -1.771887093 | -1.771887093 | 0.000268855 |
| similar to Ab2-095                                                                                          | RGD1309079           | -1.740296116 | -1.740296116 | 0.000981129 |
| cell division cycle 20 homolog (S. cerevisiae)                                                              | Cdc20                | -1.736716293 | -1.736716293 | 0.000280682 |
| sulfotransferase family, cytosolic, 1C, member 2                                                            | Sult1c2              | -1.730058634 | -1.730058634 | 9.94E-05    |
| RT1 class Ib, locus Aw2                                                                                     | RT1-Aw2              | -1.725870934 | -1.725870934 | 6.64E-05    |
| cytochrome P450, family 26, subfamily b, polypeptide 1                                                      | Cyp26b1              | -1.723356802 | -1.723356802 | 0.001822548 |
| cell division cycle associated 1                                                                            | Cdca1                | -1.717973671 | -1.717973671 | 0.003518529 |
| syncollin                                                                                                   | Sync                 | -1.715862633 | -1.715862633 | 2.85E-05    |
| allograft inflammatory factor 1                                                                             | Aif1                 | -1.699716696 | -1.699716696 | 3.87E-05    |
| SMC4 structural maintenance of chromosomes 4-like 1 (yeast)                                                 | Smc4l1               | -1.699704572 | -1.699704572 | 4.85E-05    |
| PDZ binding kinase (predicted)                                                                              | Pbk_predicted        | -1.695377625 | -1.695377625 | 1.02E-05    |
| immunoglobulin heavy chain (alpha polypeptide) (mapped)                                                     | Igha_mapped          | -1.689540162 | -1.689540162 | 0.000110832 |
| asp (abnormal spindle)-like, microcephaly associated (Drosophila) (predicted)                               | Aspm_predicted       | -1.688778319 | -1.688778319 | 3.15E-06    |
| nucleolar and spindle associated protein 1 (predicted)                                                      | Nusap1_predicted     | -1.683672858 | -1.683672858 | 4.99E-05    |
| Iroquois related homeobox 1 (Drosophila) (predicted)                                                        | Irx1_predicted       | -1.660336565 | -1.660336565 | 0.000287434 |
| candidate mediator of the p53-dependent G2 arrest                                                           | Rprm                 | -1.644918928 | -1.644918928 | 2.27E-05    |
| similar to RIKEN cDNA 9230117N10                                                                            | RGD1311155           | -1.63269329  | -1.63269329  | 2.73E-05    |
| coronin, actin binding protein 1A                                                                           | Coro1a               | -1.60318117  | -1.60318117  | 0.00372972  |
| lymphocyte antigen 86 (predicted)                                                                           | Ly86_predicted       | -1.602801397 | -1.602801397 | 1.94E-05    |
| similar to C-C chemokine receptor type 11 (C-C CKR-11) (CCR-11) (Chemokine receptor-like 1)                 | LOC685243            | -1.601863727 | -1.601863727 | 6.28E-05    |
| CD74 antigen (invariant polypeptide of major histocompatibility complex, class II antigen-associated)       | Cd74                 | -1.601796118 | -1.601796118 | 3.17E-07    |
| RT1 class II, locus Da                                                                                      | RT1-Da               | -1.593065    | -1.593065    | 0.000222195 |
| chemokine (C-C motif) ligand 6                                                                              | Ccl6                 | -1.588666962 | -1.588666962 | 5.27E-05    |
| cytochrome P450, family 4, subfamily a, polypeptide 14                                                      | Cyp4a14              | -1.586532967 | -1.586532967 | 0.001016108 |
| retinol binding protein 1, cellular                                                                         | Rbp1                 | -1.575928543 | -1.575928543 | 9.45E-05    |
| EGF-like module containing, mucin-like, hormone receptor-like sequence 1                                    | Emr1                 | -1.564315529 | -1.564315529 | 0.000949409 |
| SRY-box containing gene 4 (predicted)                                                                       | Sox4_predicted       | -1.55520287  | -1.55520287  | 0.00047255  |
| kallikrein B, plasma 1                                                                                      | Klkbl                | -1.55431913  | -1.55431913  | 4.43E-05    |
| serine (or cysteine) proteinase inhibitor, clade A (alpha-1 antiproteinase, antitrypsin), member 6 (mapped) | Serpina6             | -1.55291586  | -1.55291586  | 3.05E-05    |
| CD38 antigen                                                                                                | Cd38                 | -1.552274735 | -1.552274735 | 0.000127895 |
| stearoyl-Coenzyme A desaturase 2                                                                            | Scd2                 | -1.547126586 | -1.547126586 | 1.33E-05    |
| carbonic anhydrase 1 (predicted)                                                                            | Car1_predicted       | -1.53903187  | -1.53903187  | 1.60E-06    |
| chemokine (C-X-C motif) ligand 12                                                                           | Cxcl12               | -1.536265161 | -1.536265161 | 4.51E-05    |
| annexin A3                                                                                                  | Anxa3                | -1.535584724 | -1.535584724 | 0.001069394 |
| steroid sensitive gene 1                                                                                    | Ssg1                 | -1.534213679 | -1.534213679 | 1.62E-05    |
| unknown gene                                                                                                | NA                   | -1.529833756 | -1.529833756 | 0.000726184 |

|                                                                                                         |                      |              |              |             |
|---------------------------------------------------------------------------------------------------------|----------------------|--------------|--------------|-------------|
| spindle pole body component 24 homolog ( <i>S. cerevisiae</i> ) (predicted)                             | Spbc24_predicted     | -1.524056671 | -1.524056671 | 0.001503708 |
| similar to immunoglobulin heavy chain 6 (Igh-6)                                                         | RGD1359202           | -1.52307536  | -1.52307536  | 1.56E-05    |
| cytochrome P450, family 4, subfamily a, polypeptide 14                                                  | Cyp4a14              | -1.522559192 | -1.522559192 | 4.22E-05    |
| M-phase phosphoprotein 1 (predicted)                                                                    | Mphosph1_predicted   | -1.505619542 | -1.505619542 | 0.000632374 |
| aldo-keto reductase family 7, member A3 (aflatoxin aldehyde reductase)                                  | Akr7a3               | -1.503402746 | -1.503402746 | 0.000158906 |
| cytochrome P450, subfamily 51                                                                           | Cyp51                | -1.489379492 | -1.489379492 | 1.24E-05    |
| serum/glucocorticoid regulated kinase                                                                   | Sgk                  | -1.488980786 | -1.488980786 | 1.98E-05    |
| sulfotransferase, estrogen preferring                                                                   | Ste                  | -1.47985711  | -1.47985711  | 3.73E-06    |
| Cytochrome P450, family 2, subfamily b, polypeptide 2                                                   | Cyp2b2               | -1.478414759 | -1.478414759 | 6.13E-06    |
| unknown gene                                                                                            | NA                   | -1.468891594 | -1.468891594 | 3.66E-07    |
| fatty acid desaturase 2                                                                                 | Fads2                | -1.466830361 | -1.466830361 | 0.00011421  |
| similar to KIAA0367                                                                                     | RGD1311350           | -1.466158793 | -1.466158793 | 0.000694222 |
| similar to aldo-keto reductase family 1, member C12 (predicted)                                         | RGD1562954_predicted | -1.46467477  | -1.46467477  | 0.000107416 |
| chemokine (C-C motif) ligand 5                                                                          | Ccl5                 | -1.460353301 | -1.460353301 | 2.62E-05    |
| ephrin A1                                                                                               | Efna1                | -1.458083931 | -1.458083931 | 4.67E-05    |
| N-acetyltransferase 8 (camello like)                                                                    | Nat8                 | -1.453863727 | -1.453863727 | 0.000259134 |
| a disintegrin-like and metalloprotease (repolysin type) with thrombospondin type 1 motif, 9 (predicted) | Adamts9_predicted    | -1.431296094 | -1.431296094 | 0.001162062 |
| similar to ENSANGP00000020885 (predicted)                                                               | RGD1563825_predicted | -1.428603031 | -1.428603031 | 5.90E-05    |
| similar to DNA repair protein RAD51 homolog 1 (predicted)                                               | RGD1563603_predicted | -1.427956099 | -1.427956099 | 0.000135696 |
| similar to RIKEN cDNA 2810433K01 (predicted)                                                            | RGD1310784_predicted | -1.422748555 | -1.422748555 | 0.000662239 |
| unknown gene                                                                                            | NA                   | -1.414980241 | -1.414980241 | 5.79E-06    |
| ficolin A                                                                                               | Fcna                 | -1.413877121 | -1.413877121 | 0.001014316 |
| interleukin 1 beta                                                                                      | Il1b                 | -1.412584123 | -1.412584123 | 0.001209983 |
| unknown gene                                                                                            | NA                   | -1.407681191 | -1.407681191 | 0.003488597 |
| insulin-like growth factor binding protein, acid labile subunit                                         | Igfals               | -1.404224425 | -1.404224425 | 0.000346177 |
| tubulin, beta 5                                                                                         | Tubb5                | -1.399302582 | -1.399302582 | 6.53E-07    |
| alcohol dehydrogenase 7 (class IV), mu or sigma polypeptide                                             | Adh7                 | -1.398800012 | -1.398800012 | 0.000159645 |
| ephrin A1                                                                                               | Efna1                | -1.398695197 | -1.398695197 | 0.00123929  |
| annexin A3                                                                                              | Anxa3                | -1.395785344 | -1.395785344 | 3.10E-06    |
| unknown gene                                                                                            | NA                   | -1.393249978 | -1.393249978 | 0.000121068 |
| v-raf murine sarcoma 3611 viral oncogene homolog                                                        | Araf                 | -1.39321066  | -1.39321066  | 7.73E-05    |
| RT1 class Ib, locus Aw2                                                                                 | RT1-Aw2              | -1.386409008 | -1.386409008 | 6.05E-05    |
| gamma-aminobutyric acid (GABA) B receptor 1                                                             | Gabbr1               | -1.386158698 | -1.386158698 | 6.30E-05    |
| adenosine A3 receptor                                                                                   | Adora3               | -1.386004782 | -1.386004782 | 0.000670013 |
| NADPH oxidase 4                                                                                         | Nox4                 | -1.384521914 | -1.384521914 | 5.68E-05    |
| unknown gene                                                                                            | NA                   | -1.377699795 | -1.377699795 | 0.00014694  |
| arginine vasopressin receptor 1A                                                                        | Avpr1a               | -1.373094733 | -1.373094733 | 0.000108185 |
| glutathione S-transferase Yc2 subunit                                                                   | Yc2                  | -1.367620336 | -1.367620336 | 0.000220581 |
| RT1 class II, locus Ba                                                                                  | RT1-Ba               | -1.36580726  | -1.36580726  | 4.89E-05    |
| HRAS like suppressor 3                                                                                  | Hrasls3              | -1.360279301 | -1.360279301 | 0.001020377 |
| similar to netrin G1 (predicted)                                                                        | RGD1563465_predicted | -1.360079824 | -1.360079824 | 0.001484761 |
| cytochrome P450, subfamily 51                                                                           | Cyp51                | -1.359174355 | -1.359174355 | 2.66E-06    |
| lamin B1                                                                                                | Lmnbl                | -1.356301489 | -1.356301489 | 0.000217945 |
| similar to Glutathione S-transferase, theta 3 (predicted)                                               | RGD1562732_predicted | -1.355844277 | -1.355844277 | 7.44E-05    |
| TRAF2 binding protein                                                                                   | LOC310877            | -1.354929335 | -1.354929335 | 4.51E-05    |
| unknown gene                                                                                            | NA                   | -1.352040415 | -1.352040415 | 0.005110375 |
| transcription elongation factor A (SII)-like 1                                                          | Tceal1               | -1.351461442 | -1.351461442 | 0.000191239 |
| kynurenine 3-monooxygenase (kynurenine 3-hydroxylase)                                                   | Kmo                  | -1.34872645  | -1.34872645  | 6.85E-05    |
| carbonic anhydrase 8                                                                                    | Car8                 | -1.347037975 | -1.347037975 | 3.31E-07    |
| kinesin family member C1                                                                                | Kifc1                | -1.334966481 | -1.334966481 | 0.000223777 |
| guanylate nucleotide binding protein 2                                                                  | Gbp2                 | -1.334157569 | -1.334157569 | 0.000690411 |
| solute carrier family 17 (sodium phosphate), member 2 (predicted)                                       | Slc17a2_predicted    | -1.33234599  | -1.33234599  | 5.41E-06    |
| prostaglandin E receptor 3 (subtype EP3)                                                                | Ptger3               | -1.327891241 | -1.327891241 | 0.000202752 |
| unknown gene                                                                                            | NA                   | -1.325431296 | -1.325431296 | 0.001943858 |
| proteosome (prosome, macropain) subunit, beta type 9                                                    | Psmb9                | -1.322026628 | -1.322026628 | 0.000360454 |

|                                                                |                      |              |              |             |
|----------------------------------------------------------------|----------------------|--------------|--------------|-------------|
| stathmin 1                                                     | Stmn1                | -1.321882102 | -1.321882102 | 0.000114424 |
| ubiquitin D                                                    | Ubd                  | -1.31976269  | -1.31976269  | 0.001054299 |
| protein kinase C, delta binding protein                        | Prkcdpb              | -1.316220984 | -1.316220984 | 1.10E-05    |
| integrin alpha L                                               | Itgal                | -1.309312779 | -1.309312779 | 0.000181657 |
| unknown gene                                                   | NA                   | -1.308416793 | -1.308416793 | 3.19E-05    |
| caveolin 2                                                     | Cav2                 | -1.306940133 | -1.306940133 | 0.000734299 |
| protein kinase C, beta 1                                       | Prkcb1               | -1.304218531 | -1.304218531 | 2.34E-06    |
| pituitary tumor-transforming 1                                 | Pttg1                | -1.302152149 | -1.302152149 | 8.86E-06    |
| neurofibromatosis 1                                            | Nf1                  | -1.29799792  | -1.29799792  | 7.01E-05    |
| unknown gene                                                   | NA                   | -1.297577442 | -1.297577442 | 0.000210881 |
| poliovirus receptor-related 2 (herpesvirus entry mediator B)   | Pvrl2                | -1.297250851 | -1.297250851 | 0.000537347 |
| cytochrome P450, subfamily 2A, polypeptide 1                   | Cyp2a2               | -1.290575725 | -1.290575725 | 1.46E-09    |
| carnitine O-octanoyltransferase                                | Crot                 | -1.281809225 | -1.281809225 | 0.000353638 |
| PYD and CARD domain containing                                 | Pycard               | -1.278199743 | -1.278199743 | 0.004657237 |
| CD8 antigen, alpha chain                                       | Cd8a                 | -1.271651805 | -1.271651805 | 0.010194527 |
| regulator of G-protein signaling 18                            | Rgs18                | -1.269862067 | -1.269862067 | 7.35E-06    |
| interleukin 13 receptor, alpha 1                               | Il13ra1              | -1.268598922 | -1.268598922 | 9.77E-05    |
| adaptor-related protein complex 1, sigma 2 subunit (predicted) | Ap1s2_predicted      | -1.26542726  | -1.26542726  | 0.003893065 |
| carboxylesterase 3                                             | Ces3                 | -1.25829127  | -1.25829127  | 0.000120007 |
| sterol-C4-methyl oxidase-like                                  | Sc4mol               | -1.257344338 | -1.257344338 | 4.80E-06    |
| unknown gene                                                   | NA                   | -1.257342554 | -1.257342554 | 0.000443724 |
| carnitine O-octanoyltransferase                                | Crot                 | -1.256613819 | -1.256613819 | 0.000102642 |
| ATP-binding cassette, sub-family G (WHITE), member 8           | Abcg8                | -1.253683006 | -1.253683006 | 0.00366781  |
| kinesin family member 22                                       | Kif22                | -1.251415605 | -1.251415605 | 0.000308709 |
| CD14 antigen                                                   | Cd14                 | -1.251116133 | -1.251116133 | 9.17E-06    |
| chemokine (C-X-C motif) ligand 12                              | Cxcl12               | -1.242825326 | -1.242825326 | 0.00034001  |
| TAR DNA binding protein                                        | Tardbp               | -1.242759876 | -1.242759876 | 3.35E-05    |
| CD53 antigen                                                   | Cd53                 | -1.24045523  | -1.24045523  | 8.99E-05    |
| myosin VC (predicted)                                          | Myo5c_predicted      | -1.239359061 | -1.239359061 | 0.002675205 |
| claudin 3                                                      | Cldn3                | -1.239009243 | -1.239009243 | 0.000133482 |
| cytochrome b-245, alpha polypeptide                            | Cyba                 | -1.233911826 | -1.233911826 | 0.000565129 |
| membrane-spanning 4-domains, subfamily A, member 1 (predicted) | Ms4a1_predicted      | -1.231384981 | -1.231384981 | 7.11E-05    |
| similar to ctla-2-beta protein (141 AA) (predicted)            | RGD1565540_predicted | -1.230527815 | -1.230527815 | 0.000215147 |
| granzyme A                                                     | Gzma                 | -1.226240445 | -1.226240445 | 0.002191236 |
| similar to hypothetical protein MGC5528 (predicted)            | RGD1561749_predicted | -1.222382797 | -1.222382797 | 0.007868108 |
| serine/threonine kinase 6                                      | Stk6                 | -1.221008022 | -1.221008022 | 1.04E-05    |
| kinesin family member 11                                       | Kif11                | -1.220888759 | -1.220888759 | 0.00112485  |
| caveolin 2                                                     | Cav2                 | -1.220640918 | -1.220640918 | 0.000708814 |
| chemokine (C-X-C motif) ligand 12                              | Cxcl12               | -1.220518678 | -1.220518678 | 5.90E-05    |
| phospholipase A2, group IVA (cytosolic, calcium-dependent)     | Pla2g4a              | -1.219674624 | -1.219674624 | 0.000421394 |
| transcription factor 19                                        | Tcf19                | -1.217660539 | -1.217660539 | 0.00041913  |
| unknown gene                                                   | NA                   | -1.217550143 | -1.217550143 | 2.30E-05    |
| caveolin 2                                                     | Cav2                 | -1.216933405 | -1.216933405 | 0.000181098 |
| ring finger and KH domain containing 3 (predicted)             | Rkhd3_predicted      | -1.214862137 | -1.214862137 | 0.000235293 |
| Fc fragment of IgG, low affinity IIIa, receptor                | Fcgr3a               | -1.214528783 | -1.214528783 | 5.52E-05    |
| acid phosphatase-like 2                                        | Acp2                 | -1.211781271 | -1.211781271 | 1.44E-05    |
| fibrinogen-like 2                                              | Fgl2                 | -1.208609818 | -1.208609818 | 0.000100039 |
| aldehyde dehydrogenase 1 family, member B1                     | Aldh1b1              | -1.205606913 | -1.205606913 | 0.000199224 |
| interferon induced transmembrane protein 1 (predicted)         | Ifitm1_predicted     | -1.204490216 | -1.204490216 | 5.45E-07    |
| SRY-box containing gene 4 (predicted)                          | Sox4_predicted       | -1.201857374 | -1.201857374 | 0.001295563 |
| interleukin 13 receptor, alpha 1                               | Il13ra1              | -1.190146401 | -1.190146401 | 0.000682508 |
| membrane interacting protein of RGS16                          | Mir16                | -1.185342011 | -1.185342011 | 0.000164494 |
| acyl-CoA synthetase long-chain family member 5                 | Acs15                | -1.179941441 | -1.179941441 | 0.000426269 |
| unknown gene                                                   | NA                   | -1.178807995 | -1.178807995 | 0.000862553 |
| immunoglobulin joining chain                                   | Igj                  | -1.178448235 | -1.178448235 | 0.000199741 |

|                                                                                 |                      |              |              |             |
|---------------------------------------------------------------------------------|----------------------|--------------|--------------|-------------|
| chemokine (C-C motif) ligand 6                                                  | Ccl6                 | -1.174393213 | -1.174393213 | 1.05E-06    |
| aurora kinase B                                                                 | Aurkb                | -1.172759853 | -1.172759853 | 0.000973905 |
| similar to MGC68837 protein (predicted)                                         | RGD1565710_predicted | -1.164608214 | -1.164608214 | 0.003244479 |
| 3-hydroxybutyrate dehydrogenase, type 1                                         | Bdh1                 | -1.162272558 | -1.162272558 | 0.000375058 |
| annexin A3                                                                      | Anxa3                | -1.160231354 | -1.160231354 | 0.000114851 |
| cytochrome P450, family 2, subfamily c, polypeptide 7                           | Cyp2c7               | -1.15568524  | -1.15568524  | 3.87E-05    |
| similar to SP16                                                                 | MGC94010             | -1.154491703 | -1.154491703 | 1.07E-08    |
| unknown gene                                                                    | NA                   | -1.154393943 | -1.154393943 | 3.50E-05    |
| carbonic anhydrase 3                                                            | Ca3                  | -1.15368062  | -1.15368062  | 6.78E-07    |
| integrin beta 2                                                                 | Irgb2                | -1.151880353 | -1.151880353 | 0.002212021 |
| complement component 1, q subcomponent, alpha polypeptide                       | C1qa                 | -1.151171766 | -1.151171766 | 0.000180048 |
| kinesin family member 23 (predicted)                                            | Kif23_predicted      | -1.149134206 | -1.149134206 | 0.000108864 |
| 3'-phosphoadenosine 5'-phosphosulfate synthase 2 (predicted)                    | Papss2_predicted     | -1.148064235 | -1.148064235 | 1.16E-06    |
| caveolin 2                                                                      | Cav2                 | -1.146239419 | -1.146239419 | 0.012967368 |
| unknown gene                                                                    | NA                   | -1.144170799 | -1.144170799 | 0.000831818 |
| growth arrest specific 6                                                        | Gas6                 | -1.139137991 | -1.139137991 | 5.35E-05    |
| similar to small nuclear RNA activating complex, polypeptide 5                  | LOC691501            | -1.137338811 | -1.137338811 | 0.000558459 |
| S100 calcium binding protein A9 (calgranulin B)                                 | S100a9               | -1.135726914 | -1.135726914 | 5.74E-05    |
| folate receptor 2 (fetal) (predicted)                                           | Folr2_predicted      | -1.13409833  | -1.13409833  | 0.001628358 |
| prostaglandin D2 synthase 2                                                     | Ptgds2               | -1.131244127 | -1.131244127 | 0.000176105 |
| chondrolectin (predicted)                                                       | Chodl_predicted      | -1.130854469 | -1.130854469 | 0.011991145 |
| unknown gene                                                                    | NA                   | -1.130491722 | -1.130491722 | 0.00288942  |
| guanylate cyclase 1, soluble, beta 2                                            | Gucy1b2              | -1.130205112 | -1.130205112 | 0.000495986 |
| high mobility group box 2                                                       | Hmgb2                | -1.129570281 | -1.129570281 | 0.000757492 |
| napsin A aspartic peptidase                                                     | Napsa                | -1.12917338  | -1.12917338  | 0.001702312 |
| hypothetical LOC310540                                                          | MGC72614             | -1.125514808 | -1.125514808 | 0.00111578  |
| similar to solute carrier family 17 (sodium phosphate), member 4                | LOC679784            | -1.125362614 | -1.125362614 | 6.92E-06    |
| copine VIII (predicted)                                                         | Cpne8_predicted      | -1.123674453 | -1.123674453 | 0.00014891  |
| CD68 antigen                                                                    | Cd68                 | -1.12104455  | -1.12104455  | 0.000188624 |
| potassium channel tetramerisation domain containing 12 (predicted)              | Kctd12_predicted     | -1.114846988 | -1.114846988 | 1.00E-05    |
| minichromosome maintenance deficient 6 (MIS5 homolog, S. pombe) (S. cerevisiae) | Mcm6                 | -1.113081884 | -1.113081884 | 0.000324329 |
| unknown gene                                                                    | NA                   | -1.109137026 | -1.109137026 | 0.001259762 |
| unknown gene                                                                    | NA                   | -1.108433353 | -1.108433353 | 1.22E-05    |
| similar to NADH dehydrogenase (ubiquinone) Fe-S protein 2                       | LOC498279            | -1.104268199 | -1.104268199 | 7.51E-05    |
| hematopoietically expressed homeobox                                            | Hhex                 | -1.10235898  | -1.10235898  | 2.28E-05    |
| unknown gene                                                                    | NA                   | -1.102028519 | -1.102028519 | 1.70E-06    |
| aldehyde oxidase 1                                                              | Aox1                 | -1.09916877  | -1.09916877  | 5.57E-06    |
| thyroid hormone receptor interactor 13                                          | Trip13               | -1.097251174 | -1.097251174 | 0.00049312  |
| unknown gene                                                                    | NA                   | -1.093037179 | -1.093037179 | 9.38E-06    |
| leukotriene C4 synthase                                                         | Ltc4s                | -1.092214481 | -1.092214481 | 1.99E-05    |
| S100 calcium binding protein A8 (calgranulin A)                                 | S100a8               | -1.091015343 | -1.091015343 | 0.009879121 |
| similar to killer activatory receptor-like protein p91D (predicted)             | RGD1562625_predicted | -1.088368913 | -1.088368913 | 0.000191916 |
| unknown gene                                                                    | NA                   | -1.085277892 | -1.085277892 | 0.000417971 |
| transforming growth factor beta 1 induced transcript 4                          | Tgfb1i4              | -1.083731915 | -1.083731915 | 4.98E-05    |
| bone morphogenetic protein 2                                                    | Bmp2                 | -1.082905267 | -1.082905267 | 3.94E-07    |
| transforming, acidic coiled-coil containing protein 3                           | Tacc3                | -1.082108177 | -1.082108177 | 0.000306107 |
| cathepsin E                                                                     | Ctse                 | -1.081676459 | -1.081676459 | 0.001513917 |
| isopenentenyl-diphosphate delta isomerase                                       | Idi1                 | -1.081363043 | -1.081363043 | 0.000120184 |
| glutathione S-transferase, theta 2                                              | Gstt2                | -1.080522293 | -1.080522293 | 6.07E-05    |
| dual specificity phosphatase 6                                                  | Dusp6                | -1.079707105 | -1.079707105 | 2.04E-05    |
| hemogen                                                                         | Hemgn                | -1.078642536 | -1.078642536 | 0.000249108 |
| retinol dehydrogenase 11                                                        | Rdh11                | -1.074046347 | -1.074046347 | 1.80E-05    |
| Tyro protein tyrosine kinase binding protein                                    | Tyropb               | -1.073818448 | -1.073818448 | 2.24E-06    |
| unknown gene                                                                    | NA                   | -1.072234737 | -1.072234737 | 0.000166937 |
| RT1 class II, locus Bb                                                          | RT1-Bb               | -1.069815775 | -1.069815775 | 0.000291396 |

|                                                                                    |                      |              |              |             |
|------------------------------------------------------------------------------------|----------------------|--------------|--------------|-------------|
| unknown gene                                                                       | NA                   | -1.068318543 | -1.068318543 | 0.002236394 |
| similar to Diphosphoinositol polyphosphate phosphohydrolase 3 alpha (DIPP-3 alpha) | LOC680248            | -1.064110856 | -1.064110856 | 4.85E-05    |
| superoxide dismutase 3, extracellular                                              | Sod3                 | -1.060617644 | -1.060617644 | 5.78E-05    |
| alpha-2u globulin PGCL1                                                            | LOC259246            | -1.060488985 | -1.060488985 | 0.000638299 |
| Tumor necrosis factor receptor superfamily, member 6                               | Tnfrsf6              | -1.059483916 | -1.059483916 | 0.004499446 |
| nuclear factor, erythroid derived 2                                                | Nfe2                 | -1.059363175 | -1.059363175 | 0.006772332 |
| Ttk protein kinase (predicted)                                                     | Ttk_predicted        | -1.058041962 | -1.058041962 | 0.000283778 |
| carboxylesterase 1                                                                 | Ces1                 | -1.05740739  | -1.05740739  | 3.00E-05    |
| receptor (calcitonin) activity modifying protein 2                                 | Ramp2                | -1.057026562 | -1.057026562 | 1.02E-07    |
| unknown gene                                                                       | NA                   | -1.054804495 | -1.054804495 | 1.23E-05    |
| unknown gene                                                                       | NA                   | -1.054105736 | -1.054105736 | 0.000474483 |
| RT1 class II, locus Ba                                                             | RT1-Ba               | -1.053780908 | -1.053780908 | 0.000374848 |
| SMC2 structural maintenance of chromosomes 2-like 1 (yeast) (predicted)            | Smc2l1_predicted     | -1.052126291 | -1.052126291 | 0.01129515  |
| J domain protein 1                                                                 | LOC619393            | -1.051478016 | -1.051478016 | 3.03E-05    |
| dickkopf homolog 4 ( <i>Xenopus laevis</i> ) (predicted)                           | Dkk4_predicted       | -1.051310142 | -1.051310142 | 0.000496865 |
| secretory leukocyte peptidase inhibitor                                            | Slpi                 | -1.050890626 | -1.050890626 | 0.000168164 |
| unknown gene                                                                       | NA                   | -1.050887117 | -1.050887117 | 0.003979265 |
| nuclear factor, erythroid derived 2, like 2                                        | Nfe2l2               | -1.049812474 | -1.049812474 | 4.34E-05    |
| phospholipid transfer protein (predicted)                                          | Pltp_predicted       | -1.049358525 | -1.049358525 | 0.000574965 |
| malic enzyme 1                                                                     | Me1                  | -1.0491146   | -1.0491146   | 3.85E-05    |
| erythroid associated factor (predicted)                                            | Eraf_predicted       | -1.049006846 | -1.049006846 | 0.000167788 |
| similar to Stabilin-2 precursor (Hyaluronan receptor for endocytosis)              | LOC691926            | -1.043766741 | -1.043766741 | 0.0004291   |
| unknown gene                                                                       | NA                   | -1.038855442 | -1.038855442 | 0.000160244 |
| CD8 antigen, alpha chain                                                           | Cd8a                 | -1.03747774  | -1.03747774  | 5.24E-06    |
| aldo-keto reductase family 1, member D1                                            | Akr1d1               | -1.032879395 | -1.032879395 | 0.000157685 |
| prostaglandin E receptor 3 (subtype EP3)                                           | Ptger3               | -1.030693014 | -1.030693014 | 3.21E-07    |
| complement factor D (adipsin)                                                      | Cfd                  | -1.028031401 | -1.028031401 | 0.000701318 |
| RT1 class Ib, locus Aw2                                                            | RT1-Aw2              | -1.02795016  | -1.02795016  | 0.001236599 |
| serine (or cysteine) proteinase inhibitor, clade E, member 2                       | Serpine2             | -1.02587391  | -1.02587391  | 4.30E-07    |
| dual specificity phosphatase 6                                                     | Dusp6                | -1.025631815 | -1.025631815 | 1.77E-05    |
| Cytochrome P450 IIA1 (hepatic steroid hydroxylase IIA1) gene                       | Cyp2a1               | -1.023962025 | -1.023962025 | 0.000103465 |
| hydroxysteroid 11-beta dehydrogenase 2                                             | Hsd11b2              | -1.023463177 | -1.023463177 | 1.06E-05    |
| similar to shippo 1 (predicted)                                                    | RGD1564322_predicted | -1.022717038 | -1.022717038 | 0.001390907 |
| choline/ethanolamine phosphotransferase 1                                          | Cept1                | -1.020812467 | -1.020812467 | 7.96E-07    |
| RAS-related C3 botulinum substrate 2                                               | Rac2                 | -1.019934253 | -1.019934253 | 1.95E-05    |
| SH3 domain binding glutamic acid-rich protein-like 3 (predicted)                   | Sh3bgrl3_predicted   | -1.017192925 | -1.017192925 | 0.000161372 |
| similar to Expressed sequence AW146242 (predicted)                                 | RGD1306494_predicted | -1.011723899 | -1.011723899 | 0.002089612 |
| gamma-2a immunoglobulin heavy chain                                                | IgG-2a               | -1.010052988 | -1.010052988 | 0.000313588 |
| one cut domain, family member 1                                                    | Onecut1              | 0.987728293  | 0.987728293  | 0.000764765 |
| unknown gene                                                                       | NA                   | 0.98955641   | 0.98955641   | 0.000285417 |
| unknown gene                                                                       | NA                   | 0.993867129  | 0.993867129  | 0.003628715 |
| myxovirus (influenza virus) resistance 1                                           | Mx1                  | 0.994159658  | 0.994159658  | 9.73E-05    |
| branched chain ketoacid dehydrogenase E1, alpha polypeptide                        | Bckdha               | 0.995005613  | 0.995005613  | 0.015254297 |
| similar to RIKEN cDNA 5730557B15 (predicted)                                       | RGD1564227_predicted | 0.999752938  | 0.999752937  | 0.000604758 |
| similar to T-cell activation protein phosphatase 2C (predicted)                    | RGD1310383_predicted | 1.000792461  | 1.000792461  | 0.003443779 |
| interferon-related developmental regulator 1                                       | Ifrd1                | 1.001656593  | 1.001656593  | 0.000174303 |
| unknown gene                                                                       | NA                   | 1.002052938  | 1.002052938  | 0.004988888 |
| myosin Ib                                                                          | Myo1b                | 1.003455156  | 1.003455156  | 0.00035124  |
| similar to myocardial ischemic preconditioning upregulated protein 2 (predicted)   | RGD1565589_predicted | 1.004522936  | 1.004522936  | 0.00342525  |
| similar to diacylglycerol kinase, delta 130kDa isoform 1 (predicted)               | RGD1563309_predicted | 1.004732317  | 1.004732317  | 8.85E-05    |
| dehydrodolichyl diphosphate synthase                                               | Dhdds                | 1.006418048  | 1.006418048  | 0.000246452 |
| metallothionein 1a                                                                 | Mt1a                 | 1.006420337  | 1.006420337  | 0.008516356 |
| dolichol-phosphate (beta-D) mannosyltransferase 1 (predicted)                      | Dpm1_predicted       | 1.0066162    | 1.0066162    | 0.001385114 |
| solute carrier family 30 (zinc transporter), member 2                              | Slc30a2              | 1.007427026  | 1.007427026  | 0.001171315 |
| unknown gene                                                                       | NA                   | 1.007529749  | 1.007529749  | 5.32E-05    |

|                                                                              |                      |             |             |             |
|------------------------------------------------------------------------------|----------------------|-------------|-------------|-------------|
| unknown gene                                                                 | NA                   | 1.008257408 | 1.008257408 | 0.000435923 |
| unknown gene                                                                 | NA                   | 1.008665025 | 1.008665025 | 0.000189675 |
| plasticity-related protein 3                                                 | LOC298062            | 1.008685177 | 1.008685177 | 0.004726201 |
| unknown gene                                                                 | NA                   | 1.010577229 | 1.010577229 | 0.000299438 |
| RAB30, member RAS oncogene family                                            | Rab30                | 1.017529369 | 1.017529369 | 1.09E-05    |
| DEAD (Asp-Glu-Ala-Asp) box polypeptide 27                                    | Ddx27                | 1.017729516 | 1.017729516 | 1.61E-05    |
| protease, serine, 32 (predicted)                                             | Prss32_predicted     | 1.01809829  | 1.01809829  | 0.014562285 |
| protocadherin alpha 4                                                        | Pcdha4               | 1.02027235  | 1.02027235  | 0.000531865 |
| unknown gene                                                                 | NA                   | 1.020315118 | 1.020315118 | 0.000417625 |
| pantothenate kinase 2 (Hallervorden-Spatz syndrome) (predicted)              | Pank2_predicted      | 1.023846022 | 1.023846022 | 0.002280356 |
| unknown gene                                                                 | NA                   | 1.025174887 | 1.025174887 | 0.000137051 |
| ectodermal-neural cortex 1                                                   | Enc1                 | 1.025420396 | 1.025420396 | 9.24E-05    |
| fatty acid synthase                                                          | Fasn                 | 1.028414036 | 1.028414036 | 1.53E-05    |
| chloride intracellular channel 2                                             | Clic2                | 1.029612499 | 1.029612499 | 0.000252497 |
| unknown gene                                                                 | NA                   | 1.030748433 | 1.030748433 | 0.000771519 |
| RGD1564391 (predicted)                                                       | RGD1564391_predicted | 1.030883557 | 1.030883557 | 0.01429997  |
| unknown gene                                                                 | NA                   | 1.031543989 | 1.031543989 | 0.00010138  |
| unknown gene                                                                 | NA                   | 1.03247871  | 1.03247871  | 0.000230345 |
| nuclear receptor subfamily 1, group I, member 2                              | Nr1i2                | 1.032724668 | 1.032724668 | 5.64E-05    |
| alcohol dehydrogenase 6 (class V)                                            | Adh6                 | 1.036337245 | 1.036337245 | 0.002217778 |
| FCH and double SH3 domains 2 (predicted)                                     | Fchsd2_predicted     | 1.037006066 | 1.037006066 | 0.001246558 |
| unknown gene                                                                 | NA                   | 1.037883326 | 1.037883326 | 1.42E-05    |
| sulfotransferase family 1A, phenol-preferring, member 1                      | Sult1a1              | 1.039516665 | 1.039516665 | 1.46E-07    |
| peroxisomal membrane protein 4                                               | Pxmp4                | 1.043430126 | 1.043430126 | 0.000619405 |
| unknown gene                                                                 | NA                   | 1.045087034 | 1.045087034 | 0.000900661 |
| interferon-induced protein with tetratricopeptide repeats 2                  | Ifit2                | 1.04533073  | 1.04533073  | 5.15E-06    |
| nuclear factor I/B                                                           | Nfib                 | 1.049224585 | 1.049224585 | 0.000184722 |
| unknown gene                                                                 | NA                   | 1.049676636 | 1.049676636 | 9.48E-05    |
| S-adenosylhomocysteine hydrolase                                             | Ahcy                 | 1.052989735 | 1.052989735 | 4.24E-06    |
| syntaxin 5a                                                                  | Stx5a                | 1.053254505 | 1.053254505 | 0.003882607 |
| unknown gene                                                                 | NA                   | 1.054727078 | 1.054727078 | 0.000430739 |
| similar to mKIAA0613 protein (predicted)                                     | RGD1564875_predicted | 1.05551086  | 1.05551086  | 4.35E-05    |
| interferon-induced protein with tetratricopeptide repeats 2                  | Ifit2                | 1.057142727 | 1.057142727 | 1.22E-06    |
| thymidylate kinase family LPS-inducible member (predicted)                   | Tyki_predicted       | 1.057875901 | 1.057875901 | 8.25E-05    |
| unknown gene                                                                 | NA                   | 1.058481515 | 1.058481515 | 0.009975546 |
| unknown gene                                                                 | NA                   | 1.058758964 | 1.058758964 | 0.000224944 |
| unknown gene                                                                 | NA                   | 1.059411558 | 1.059411558 | 1.83E-05    |
| unknown gene                                                                 | NA                   | 1.061436434 | 1.061436434 | 0.008279793 |
| interleukin 6 receptor, alpha                                                | Il6ra                | 1.062859245 | 1.062859245 | 0.000174276 |
| abhydrolase domain containing 6                                              | Abhd6                | 1.065789757 | 1.065789757 | 0.001255857 |
| basic helix-loop-helix domain containing, class B2                           | Bhlhb2               | 1.066667865 | 1.066667865 | 0.000251251 |
| unknown gene                                                                 | NA                   | 1.067239116 | 1.067239116 | 0.009690042 |
| inositol 1,4,5-triphosphate receptor 1                                       | Itp1                 | 1.069525957 | 1.069525957 | 3.17E-05    |
| interferon regulatory factor 7                                               | Irf7                 | 1.070195555 | 1.070195555 | 0.000130065 |
| branched chain keto acid dehydrogenase E1, beta polypeptide                  | Bckdhb               | 1.07828558  | 1.07828558  | 2.82E-05    |
| microtubule-associated protein 7 (predicted)                                 | Mtap7_predicted      | 1.07987826  | 1.07987826  | 0.000204104 |
| similar to homolog of Human holocarboxylase synthetase gene HLCS (predicted) | RGD1565360_predicted | 1.080460351 | 1.080460351 | 0.001591323 |
| histone cluster 2, H2aa (predicted)                                          | Hist2h2aa_predicted  | 1.083078553 | 1.083078553 | 0.000438934 |
| DnaJ (Hsp40) homolog, subfamily B, member 6                                  | Dnajb6               | 1.084664931 | 1.084664931 | 0.000982196 |
| aspartoacylase                                                               | Aspa                 | 1.08560529  | 1.08560529  | 0.001067319 |
| unknown gene                                                                 | NA                   | 1.088383428 | 1.088383428 | 0.000155931 |
| unknown gene                                                                 | NA                   | 1.089494832 | 1.089494832 | 1.47E-05    |
| thioesterase superfamily member 2 (predicted)                                | Them2_predicted      | 1.09465055  | 1.09465055  | 5.66E-05    |
| similar to Ext1                                                              | LOC299907            | 1.094798941 | 1.094798941 | 0.000353179 |
| similar to Proline oxidase, mitochondrial precursor (Proline dehydrogenase)  | LOC680409            | 1.095406356 | 1.095406356 | 4.51E-05    |

|                                                                                           |                      |             |             |             |
|-------------------------------------------------------------------------------------------|----------------------|-------------|-------------|-------------|
| transmembrane protein 86A (predicted)                                                     | Tmem86a_predicted    | 1.096770355 | 1.096770355 | 0.004594484 |
| unknwon gene                                                                              | NA                   | 1.102804325 | 1.102804325 | 0.000195572 |
| 24-dehydrocholesterol reductase                                                           | Dhcr24               | 1.1067042   | 1.1067042   | 2.35E-05    |
| similar to RIKEN cDNA 1810014F10 gene (predicted)                                         | RGD1311186_predicted | 1.110156143 | 1.110156143 | 3.62E-05    |
| butyrobetaine (gamma), 2-oxoglutarate dioxygenase 1 (gamma-butyrobetaine hydroxylase)     | Bbox1                | 1.110448345 | 1.110448345 | 4.05E-05    |
| unknwon gene                                                                              | NA                   | 1.113608076 | 1.113608076 | 7.94E-05    |
| aconitase 2, mitochondrial                                                                | Aco2                 | 1.114206109 | 1.114206109 | 0.001810377 |
| glucose-6-phosphatase, catalytic                                                          | G6pc                 | 1.12222331  | 1.12222331  | 2.24E-05    |
| hypoxanthine guanine phosphoribosyl transferase                                           | Hprt                 | 1.125438097 | 1.125438097 | 9.49E-05    |
| similar to hypothetical protein D4Ert89e                                                  | RGD1305703           | 1.126359265 | 1.126359265 | 2.38E-05    |
| unknwon gene                                                                              | NA                   | 1.130267945 | 1.130267945 | 2.64E-06    |
| Protein kinase, interferon-inducible double stranded RNA dependent                        | Prkr                 | 1.13232141  | 1.13232141  | 0.002990459 |
| proprotein convertase subtilisin/kexin type 5                                             | Pcsk5                | 1.134426189 | 1.134426189 | 2.48E-05    |
| unknwon gene                                                                              | NA                   | 1.134488194 | 1.134488194 | 0.025856692 |
| signal transducer and activator of transcription 1                                        | Stat1                | 1.137156136 | 1.137156136 | 2.64E-06    |
| RNA (guanine-7-) methyltransferase                                                        | Rnmt                 | 1.141972618 | 1.141972618 | 0.003340707 |
| arachidonate 5-lipoxygenase                                                               | Alox5                | 1.144029969 | 1.144029969 | 0.001719428 |
| regulator of G-protein signaling 16                                                       | Rgs16                | 1.144442332 | 1.144442332 | 0.001598821 |
| unknwon gene                                                                              | NA                   | 1.145153487 | 1.145153487 | 0.005213872 |
| similar to RIKEN cDNA B630019K06 (predicted)                                              | RGD1560784_predicted | 1.149009034 | 1.149009034 | 0.000401945 |
| Kruppel-like factor 9                                                                     | Klf9                 | 1.151269918 | 1.151269918 | 8.51E-06    |
| unknwon gene                                                                              | NA                   | 1.151478539 | 1.151478539 | 0.000743893 |
| hypothetical protein LOC619561                                                            | LOC619561            | 1.152462202 | 1.152462202 | 7.70E-05    |
| similar to T-cell activation protein phosphatase 2C (predicted)                           | RGD1310383_predicted | 1.153744226 | 1.153744226 | 0.000240988 |
| forkhead box O1A                                                                          | Foxo1a               | 1.164995441 | 1.164995441 | 0.000644795 |
| DnaJ (Hsp40) homolog, subfamily B, member 9                                               | Dnajb9               | 1.165197972 | 1.165197972 | 0.000447428 |
| sulfotransferase family, cytosolic, 2B, member 1 (predicted)                              | Sult2b1_predicted    | 1.165979312 | 1.165979312 | 0.000509994 |
| anterior pharynx defective 1b homolog (C. elegans)                                        | Aph1b                | 1.166419586 | 1.166419586 | 0.000477187 |
| unknwon gene                                                                              | NA                   | 1.166464544 | 1.166464544 | 0.001664881 |
| unknwon gene                                                                              | NA                   | 1.166546844 | 1.166546844 | 0.00048996  |
| RNA binding motif protein 5                                                               | Rbm5                 | 1.170279445 | 1.170279445 | 0.000168586 |
| ubiquitin-conjugating enzyme E2B, RAD6 homolog (S. cerevisiae)                            | Ube2b                | 1.173086509 | 1.173086509 | 2.15E-05    |
| Nucleoside 2-deoxyribosyltransferase domain containing protein RGD620382                  | RGD620382            | 1.173579756 | 1.173579756 | 0.000180511 |
| fatty acid synthase                                                                       | Fasn                 | 1.175254733 | 1.175254733 | 4.42E-05    |
| unknwon gene                                                                              | NA                   | 1.176738039 | 1.176738039 | 2.29E-05    |
| unknwon gene                                                                              | NA                   | 1.184760372 | 1.184760372 | 0.000101222 |
| betaine-homocysteine methyltransferase                                                    | Bhmt                 | 1.194092145 | 1.194092145 | 3.71E-06    |
| tribbles homolog 3 (Drosophila)                                                           | Trib3                | 1.199381791 | 1.199381791 | 0.001212442 |
| myosin Ib                                                                                 | Myo1b                | 1.199440588 | 1.199440588 | 1.79E-05    |
| nuclear receptor binding factor 2                                                         | Nr1b2                | 1.201542004 | 1.201542004 | 0.000716488 |
| chemokine (C-X-C motif) ligand 10                                                         | Cxcl10               | 1.20175307  | 1.20175307  | 0.003768636 |
| S100 calcium binding protein G                                                            | S100g                | 1.20304723  | 1.20304723  | 0.002600502 |
| alpha-2,6-sialyltransferase ST6GalNAc IV                                                  | siat7D               | 1.20926761  | 1.20926761  | 0.000159934 |
| similar to Beta-sarcoglycan (Beta-SG) (43 kDa dystrophin-associated glycoprotein) (43DAG) | LOC680229            | 1.213349638 | 1.213349638 | 0.003638768 |
| similar to low density lipoprotein receptor-related protein binding protein (predicted)   | RGD1565715_predicted | 1.217003927 | 1.217003927 | 0.002415851 |
| glycine N-methyltransferase                                                               | Gnmt                 | 1.22200569  | 1.22200569  | 4.35E-05    |
| unknwon gene                                                                              | NA                   | 1.223709229 | 1.223709229 | 9.32E-05    |
| similar to hypothetical protein FLJ13448                                                  | RGD1359509           | 1.230366319 | 1.230366319 | 0.000561556 |
| unknwon gene                                                                              | NA                   | 1.233744835 | 1.233744835 | 0.000216887 |
| FBJ murine osteosarcoma viral oncogene homolog                                            | Fos                  | 1.238460864 | 1.238460864 | 0.000823299 |
| orosomucoid 1                                                                             | Orm1                 | 1.24098738  | 1.24098738  | 1.05E-05    |
| malate dehydrogenase 1, NAD (soluble)                                                     | Mdh1                 | 1.241092459 | 1.241092459 | 5.44E-05    |
| inositol hexaphosphate kinase 2                                                           | Ihpk2                | 1.247735109 | 1.247735109 | 0.00047355  |
| myotubularin related protein 7 (predicted)                                                | Mtmr7_predicted      | 1.249041573 | 1.249041573 | 0.000424142 |
| solute carrier family 37 (glycerol-6-phosphate transporter), member 4                     | Slc37a4              | 1.250274328 | 1.250274328 | 3.63E-05    |



|                                                                                                |                      |             |             |             |
|------------------------------------------------------------------------------------------------|----------------------|-------------|-------------|-------------|
| protein kinase, cAMP-dependent, regulatory, type 2, alpha                                      | Prkar2a              | 1.251896438 | 1.251896438 | 0.000299838 |
| proprotein convertase subtilisin/kexin type 5                                                  | Pesks5               | 1.262540696 | 1.262540696 | 0.000159444 |
| zeta-chain (TCR) associated protein kinase 70 (mapped)                                         | Zap70                | 1.273112083 | 1.273112083 | 1.98E-07    |
| dolichol-phosphate (beta-D) mannosyltransferase 1 (predicted)                                  | Dpm1_predicted       | 1.285165015 | 1.285165015 | 1.03E-05    |
| similar to mesenchymal stem cell protein DSC54 (predicted)                                     | RGD1564528_predicted | 1.285567871 | 1.285567871 | 0.00173755  |
| protein tyrosine phosphatase, receptor type, G                                                 | Ptprg                | 1.289427808 | 1.289427808 | 3.83E-05    |
| sterol carrier protein 2                                                                       | Scp2                 | 1.295958916 | 1.295958916 | 7.20E-05    |
| phytanoyl-CoA 2-hydroxylase 2                                                                  | Phyh2                | 1.302058275 | 1.302058275 | 4.18E-06    |
| serine protease inhibitor, Kazal type 1                                                        | Spink1               | 1.303207722 | 1.303207722 | 0.000871408 |
| ATPase, Na <sup>+</sup> /K <sup>+</sup> transporting, beta 1 polypeptide                       | Atp1b1               | 1.304621292 | 1.304621292 | 1.62E-05    |
| signal transducer and activator of transcription 1                                             | Stat1                | 1.306913706 | 1.306913706 | 0.000334026 |
| solute carrier family 3, member 1                                                              | Slc3a1               | 1.307106893 | 1.307106893 | 6.38E-05    |
| hepatic protein E1H                                                                            | E1ih                 | 1.30910529  | 1.30910529  | 0.000122879 |
| phosphoenol carboxykinase                                                                      | Pepck                | 1.309609424 | 1.309609424 | 0.006321522 |
| hydroxysteroid (17-beta) dehydrogenase 9                                                       | Hsd17b9              | 1.310561495 | 1.310561495 | 4.97E-05    |
| ubiquitin-conjugating enzyme E2B, RAD6 homolog (S. cerevisiae)                                 | Ube2b                | 1.314165967 | 1.314165967 | 6.43E-05    |
| transient receptor potential cation channel, subfamily M, member 2                             | Trpm2                | 1.318248182 | 1.318248182 | 5.67E-05    |
| glutamate oxaloacetate transaminase 1                                                          | Got1                 | 1.319117268 | 1.319117268 | 4.39E-05    |
| cyclin-dependent kinase inhibitor 1A                                                           | Cdkn1a               | 1.324280421 | 1.324280421 | 7.56E-05    |
| fibroblast growth factor 21                                                                    | Fgf21                | 1.328152734 | 1.328152734 | 0.000237391 |
| homocysteine-inducible, endoplasmic reticulum stress-inducible, ubiquitin-like domain member 1 | Herpud1              | 1.340381543 | 1.340381543 | 0.000139153 |
| protein kinase, cAMP-dependent, regulatory, type 2, alpha                                      | Prkar2a              | 1.344806151 | 1.344806151 | 0.000104517 |
| similar to histocompatibility 28                                                               | LOC310968            | 1.349206531 | 1.349206531 | 1.93E-05    |
| proline rich 2                                                                                 | Pnrc1                | 1.351841327 | 1.351841327 | 0.000126403 |
| basic helix-loop-helix domain containing, class B2                                             | Bhlhb2               | 1.353505184 | 1.353505184 | 0.000152851 |
| potential ubiquitin ligase                                                                     | Herc6                | 1.356266474 | 1.356266474 | 0.018607026 |
| calcium-sensing receptor like 1                                                                | Casr1                | 1.356870312 | 1.356870312 | 2.98E-05    |
| lectin, galactose binding, soluble 5                                                           | Lgals5               | 1.359291663 | 1.359291663 | 2.75E-05    |
| unkwnon gene                                                                                   | NA                   | 1.364152265 | 1.364152265 | 0.001278811 |
| unkwnon gene                                                                                   | NA                   | 1.364552108 | 1.364552108 | 6.49E-05    |
| protocadherin alpha 4                                                                          | Pcdha4               | 1.377988458 | 1.377988458 | 0.001382188 |
| glyceronephosphate O-acyltransferase                                                           | Gnpat                | 1.384434028 | 1.384434028 | 0.000259765 |
| carnitine palmitoyltransferase 1a, liver                                                       | Cpt1a                | 1.387686918 | 1.387686918 | 7.70E-07    |
| unkwnon gene                                                                                   | NA                   | 1.395359705 | 1.395359705 | 6.95E-05    |
| microtubule-associated protein 1b                                                              | Map1b                | 1.395774689 | 1.395774689 | 7.80E-05    |
| thyroid hormone responsive protein                                                             | Thrsp                | 1.397995348 | 1.397995348 | 3.89E-05    |
| angiotensinogen (serpin peptidase inhibitor, clade A, member 8)                                | Agt                  | 1.40259302  | 1.40259302  | 1.97E-05    |
| FK506 binding protein 5                                                                        | Fkbp5                | 1.404077798 | 1.404077798 | 0.000400178 |
| unkwnon gene                                                                                   | NA                   | 1.404738446 | 1.404738446 | 8.18E-06    |
| endothelin receptor type A                                                                     | Ednra                | 1.408370365 | 1.408370365 | 0.00056749  |
| cyclin-dependent kinase inhibitor 1A                                                           | Cdkn1a               | 1.408578239 | 1.408578239 | 0.000211744 |
| carnitine palmitoyltransferase 1a, liver                                                       | Cpt1a                | 1.414872264 | 1.414872264 | 6.56E-05    |
| similar to hypothetical protein BC011981 (predicted)                                           | RGD1310609_predicted | 1.422134034 | 1.422134034 | 0.001890032 |
| unkwnon gene                                                                                   | NA                   | 1.432172221 | 1.432172221 | 0.000232817 |
| v-maf musculoaponeurotic fibrosarcoma oncogene family, protein B (avian)                       | Mafb                 | 1.433080366 | 1.433080366 | 1.86E-06    |
| unkwnon gene                                                                                   | NA                   | 1.434260739 | 1.434260739 | 0.000658203 |
| solute carrier family 2, member 5                                                              | Slc2a5               | 1.440390107 | 1.440390107 | 0.000736607 |
| forkhead box O1A                                                                               | Foxo1a               | 1.450937143 | 1.450937143 | 0.000587058 |
| insulin-like growth factor binding protein 1                                                   | Igfbp1               | 1.45187632  | 1.45187632  | 1.92E-05    |
| rhomboid, veinlet-like 7 (Drosophila) (predicted)                                              | Rhbd17_predicted     | 1.458824452 | 1.458824452 | 4.62E-05    |
| hypothetical protein LOC619558                                                                 | LOC619558            | 1.460112194 | 1.460112194 | 1.48E-05    |
| 2',5'-oligoadenylate synthetase 1, 40/46kDa                                                    | Oas1                 | 1.462798748 | 1.462798748 | 3.50E-06    |
| unkwnon gene                                                                                   | NA                   | 1.463386572 | 1.463386572 | 1.43E-06    |
| splicing factor 3b, subunit 1                                                                  | Sf3b1                | 1.465161441 | 1.465161441 | 8.69E-05    |
| guanylate cyclase 2C                                                                           | Gucy2c               | 1.466970384 | 1.466970384 | 0.001203956 |

|                                                                                           |                      |             |             |             |
|-------------------------------------------------------------------------------------------|----------------------|-------------|-------------|-------------|
| 2'-5' oligoadenylate synthetase-like 1                                                    | Oasl1                | 1.471302813 | 1.471302813 | 0.000294296 |
| solute carrier family 38, member 2                                                        | Slc38a2              | 1.490463238 | 1.490463238 | 1.21E-05    |
| basic helix-loop-helix domain containing, class B, 8                                      | Bhlhb8               | 1.49460773  | 1.49460773  | 0.000300185 |
| acetyl-coenzyme A carboxylase alpha                                                       | Acaca                | 1.500771601 | 1.500771601 | 2.91E-06    |
| amine oxidase, copper containing 3                                                        | Aoc3                 | 1.50128825  | 1.50128825  | 2.60E-05    |
| signal transducer and activator of transcription 1                                        | Stat1                | 1.503881453 | 1.503881453 | 1.34E-05    |
| nuclear protein 1                                                                         | Nupr1                | 1.507918878 | 1.507918878 | 2.64E-05    |
| dual specificity phosphatase 1                                                            | Dusp1                | 1.512003391 | 1.512003391 | 1.02E-05    |
| thyroid hormone responsive protein                                                        | Thrsp                | 1.51754742  | 1.51754742  | 6.80E-05    |
| solute carrier family 41, member 3                                                        | Slc41a3              | 1.517602899 | 1.517602899 | 7.50E-05    |
| unknwon gene                                                                              | NA                   | 1.520456489 | 1.520456489 | 1.67E-06    |
| megalencephalic leukoencephalopathy with subcortical cysts 1 homolog (human) (predicted)  | Mlc1_predicted       | 1.543213696 | 1.543213696 | 0.000154635 |
| WDNM1 homolog                                                                             | LOC360228            | 1.543887475 | 1.543887475 | 6.85E-05    |
| hypothetical protein LOC685448                                                            | LOC685448            | 1.548647058 | 1.548647058 | 0.000818367 |
| similar to CG1998-PA                                                                      | LOC691221            | 1.552042413 | 1.552042413 | 0.000387713 |
| dual specificity phosphatase 1                                                            | Dusp1                | 1.570849015 | 1.570849015 | 0.000229571 |
| protein tyrosine phosphatase, receptor type, G                                            | Ptprg                | 1.580955898 | 1.580955898 | 6.36E-05    |
| unknwon gene                                                                              | NA                   | 1.587129106 | 1.587129106 | 7.77E-06    |
| thyroid hormone responsive protein                                                        | Thrsp                | 1.605204213 | 1.605204213 | 9.76E-06    |
| protein kinase, cAMP-dependent, regulatory, type 2, alpha                                 | Prkar2a              | 1.61428765  | 1.61428765  | 0.000520637 |
| similar to hypothetical protein D4Ert89e                                                  | RGD1305703           | 1.618482589 | 1.618482589 | 0.00644234  |
| unknwon gene                                                                              | NA                   | 1.622590668 | 1.622590668 | 0.000612255 |
| endothelin receptor type A                                                                | Ednra                | 1.630456903 | 1.630456903 | 0.000569308 |
| unknwon gene                                                                              | NA                   | 1.633764686 | 1.633764686 | 0.000623873 |
| hypothetical protein LOC685448                                                            | LOC685448            | 1.641710587 | 1.641710587 | 6.69E-07    |
| lipoprotein lipase                                                                        | Lpl                  | 1.651260134 | 1.651260134 | 2.21E-05    |
| similar to ankyrin repeat and SOCs box-containing protein 5                               | LOC361187            | 1.652101428 | 1.652101428 | 0.002341155 |
| unknwon gene                                                                              | NA                   | 1.652621478 | 1.652621478 | 9.58E-07    |
| microtubule-associated protein 1 light chain 3 beta                                       | Map1lc3b             | 1.657481173 | 1.657481173 | 7.37E-07    |
| sperm specific antigen 2 (predicted)                                                      | Ssfa2_predicted      | 1.658539815 | 1.658539815 | 0.005857011 |
| unknwon gene                                                                              | NA                   | 1.675525685 | 1.675525685 | 3.78E-05    |
| retinol dehydrogenase 2                                                                   | Rdh2                 | 1.67553581  | 1.67553581  | 4.75E-06    |
| zinc finger protein 655                                                                   | Zfp655               | 1.681612195 | 1.681612195 | 0.000969995 |
| benzodiazepine receptor, peripheral                                                       | Bzrp                 | 1.690123105 | 1.690123105 | 2.75E-05    |
| P450 (cytochrome) oxidoreductase                                                          | Por                  | 1.696944119 | 1.696944119 | 1.90E-05    |
| acetyl-coenzyme A carboxylase alpha                                                       | Acaca                | 1.700603066 | 1.700603066 | 0.000832624 |
| unknwon gene                                                                              | NA                   | 1.711129847 | 1.711129847 | 0.000621269 |
| AA926063gene                                                                              | AA926063             | 1.712293647 | 1.712293647 | 0.000105231 |
| FK506 binding protein 5                                                                   | Fkbp5                | 1.72503502  | 1.72503502  | 0.000146219 |
| lectin, galactose binding, soluble 9                                                      | Lgals9               | 1.729298527 | 1.729298527 | 2.99E-05    |
| similar to mKIAA0613 protein (predicted)                                                  | RGD1564875_predicted | 1.736268048 | 1.736268048 | 0.000955114 |
| unknwon gene                                                                              | NA                   | 1.740289043 | 1.740289043 | 0.000546046 |
| decorin                                                                                   | Dcn                  | 1.745423557 | 1.745423557 | 2.08E-05    |
| similar to BTEB3 protein (predicted)                                                      | RGD1565099_predicted | 1.751757858 | 1.751757858 | 0.000304907 |
| unknwon gene                                                                              | NA                   | 1.759118624 | 1.759118624 | 0.000370174 |
| plasticity-related protein 3                                                              | LOC298062            | 1.771018526 | 1.771018526 | 2.80E-06    |
| phospholipase A2, group X1IA (predicted)                                                  | Pla2g12a_predicted   | 1.782487572 | 1.782487572 | 0.000401055 |
| similar to mKIAA0212 protein (predicted)                                                  | RGD1563633_predicted | 1.783833367 | 1.783833367 | 5.65E-06    |
| similar to leiomodin 2 (cardiac)                                                          | LOC296935            | 1.784942648 | 1.784942648 | 0.000552054 |
| arylsulfatase B                                                                           | Arsb                 | 1.788632096 | 1.788632096 | 5.23E-05    |
| unknwon gene                                                                              | NA                   | 1.820772383 | 1.820772383 | 5.18E-05    |
| P450 (cytochrome) oxidoreductase                                                          | Por                  | 1.853237221 | 1.853237221 | 0.000208161 |
| camello-like 1                                                                            | Cml1                 | 1.853557535 | 1.853557535 | 1.54E-05    |
| interferon-induced protein with tetratricopeptide repeats 3                               | Ifit3                | 1.8590584   | 1.8590584   | 9.01E-05    |
| similar to Beta-sarcoglycan (Beta-SG) (43 kDa dystrophin-associated glycoprotein) (43DAG) | LOC680229            | 1.871302452 | 1.871302452 | 6.80E-06    |

|                                                                                           |                      |             |             |             |
|-------------------------------------------------------------------------------------------|----------------------|-------------|-------------|-------------|
| nicotinamide N-methyltransferase (predicted)                                              | Nmnt_predicted       | 1.884454456 | 1.884454456 | 1.51E-06    |
| similar to hypothetical protein FLJ10154                                                  | RGD1310061           | 1.892774715 | 1.892774715 | 8.21E-05    |
| metallothionein 1a                                                                        | Mt1a                 | 1.898499595 | 1.898499595 | 4.10E-07    |
| solute carrier family 25 (mitochondrial carrier, phosphate carrier), member 25            | Slc25a25             | 1.89979856  | 1.89979856  | 4.15E-06    |
| potassium intermediate/small conductance calcium-activated channel, subfamily N, member 2 | Kcnn2                | 1.90014453  | 1.90014453  | 0.000195314 |
| transformation related protein 53 inducible nuclear protein 1                             | Trp53inp1            | 1.916572365 | 1.916572365 | 0.000532333 |
| solute carrier family 13 (sodium-dependent citrate transporter), member 5                 | Slc13a5              | 1.930393911 | 1.930393911 | 4.45E-05    |
| similar to mKIAA0212 protein (predicted)                                                  | RGD1563633_predicted | 1.943182955 | 1.943182955 | 6.02E-05    |
| glutamic pyruvic transaminase 1, soluble                                                  | Gpt1                 | 1.968022721 | 1.968022721 | 1.20E-05    |
| ubiquitin specific peptidase 18                                                           | Usp18                | 1.983659525 | 1.983659525 | 6.68E-08    |
| 6-phosphofructo-2-kinase/fructose-2,6-biphosphatase 1                                     | Pfkfb1               | 1.98856786  | 1.98856786  | 8.06E-05    |
| unknwon gene                                                                              | NA                   | 2.011213835 | 2.011213835 | 0.000273751 |
| unknwon gene                                                                              | NA                   | 2.013876153 | 2.013876153 | 0.001129352 |
| myxovirus (influenza virus) resistance 2                                                  | Mx2                  | 2.031112452 | 2.031112452 | 0.000222142 |
| interferon-induced protein 44                                                             | Ifi44                | 2.04205433  | 2.04205433  | 6.78E-05    |
| TSC22 domain family 3                                                                     | Tsc22d3              | 2.046871264 | 2.046871264 | 0.000142741 |
| unknwon gene                                                                              | NA                   | 2.061026033 | 2.061026033 | 0.000457885 |
| unknwon gene                                                                              | NA                   | 2.061593849 | 2.061593849 | 5.83E-06    |
| unknwon gene                                                                              | NA                   | 2.097513001 | 2.097513001 | 1.56E-05    |
| odorant binding protein I f                                                               | Obp1f                | 2.101993824 | 2.101993824 | 3.68E-06    |
| similar to mKIAA0613 protein (predicted)                                                  | RGD1564875_predicted | 2.116359334 | 2.116359334 | 4.02E-05    |
| TSC22 domain family 3                                                                     | Tsc22d3              | 2.142806678 | 2.142806678 | 0.000136727 |
| cytochrome P450, 4a12                                                                     | Cyp4a12              | 2.15073155  | 2.15073155  | 0.000218916 |
| serine dehydratase                                                                        | Sds                  | 2.158189247 | 2.158189247 | 2.39E-06    |
| major histocompatibility complex, class II, DM alpha                                      | Hla-dma              | 2.172076089 | 2.172076089 | 4.27E-06    |
| similar to mKIAA0212 protein (predicted)                                                  | RGD1563633_predicted | 2.177260979 | 2.177260979 | 0.000240758 |
| connective tissue growth factor                                                           | Ctgf                 | 2.190620819 | 2.190620819 | 6.00E-05    |
| osteonodulin                                                                              | Omd                  | 2.206579623 | 2.206579623 | 4.97E-07    |
| minichromosome maintenance deficient 10 (S. cerevisiae) (predicted)                       | Mem10_predicted      | 2.263963989 | 2.263963989 | 0.000708609 |
| 2-amino-3-carboxymuconate-6-semialdehyde decarboxylase                                    | Acmsd                | 2.313012997 | 2.313012997 | 2.18E-07    |
| unknwon gene                                                                              | NA                   | 2.416445811 | 2.416445811 | 0.000105611 |
| zinc finger and BTB domain containing 16                                                  | Zbtb16               | 2.425056235 | 2.425056235 | 7.19E-08    |
| lipin 1                                                                                   | Lpin1                | 2.43126298  | 2.43126298  | 4.10E-06    |
| minichromosome maintenance deficient 10 (S. cerevisiae) (predicted)                       | Mem10_predicted      | 2.478222013 | 2.478222013 | 2.14E-05    |
| cytochrome P450, 4a12                                                                     | Cyp4a12              | 2.486084107 | 2.486084107 | 2.38E-06    |
| endothelin receptor type A                                                                | Ednra                | 2.606051431 | 2.606051431 | 5.99E-05    |
| cell death-inducing DNA fragmentation factor, alpha subunit-like effector A (predicted)   | Cidea_predicted      | 2.609818002 | 2.609818002 | 5.66E-05    |
| cytochrome P450, family 1, subfamily a, polypeptide 1                                     | Cyp1a1               | 2.614499069 | 2.614499069 | 3.42E-05    |
| unknwon gene                                                                              | NA                   | 2.637634674 | 2.637634674 | 2.58E-07    |
| 2-5 oligoadenylate synthetase 1B                                                          | Oas1b                | 2.650854969 | 2.650854969 | 8.34E-06    |
| unknwon gene                                                                              | NA                   | 2.682847195 | 2.682847195 | 1.43E-05    |
| major urinary protein 5                                                                   | Mup5                 | 2.781589674 | 2.781589674 | 0.000201177 |
| similar to RIKEN cDNA 5730410E15 gene (predicted)                                         | RGD1564335_predicted | 2.782926495 | 2.782926495 | 4.61E-07    |
| hypothetical LOC300207 (predicted)                                                        | RGD1305928_predicted | 2.967308924 | 2.967308924 | 7.16E-05    |
| unknwon gene                                                                              | NA                   | 2.979808223 | 2.979808223 | 0.000175758 |
| unknwon gene                                                                              | NA                   | 3.052019392 | 3.052019392 | 1.72E-05    |
| ubiquitin specific peptidase 2                                                            | Usp2                 | 3.134782256 | 3.134782256 | 6.87E-06    |
| major urinary protein 5                                                                   | Mup5                 | 3.176082924 | 3.176082924 | 2.19E-05    |
| myxovirus (influenza virus) resistance 2                                                  | Mx2                  | 3.226306387 | 3.226306387 | 1.82E-05    |
| similar to Metallothionein-2 (MT-2) (Metallothionein-II) (MT-II)                          | LOC689415            | 3.268792679 | 3.268792679 | 4.49E-07    |
| unknwon gene                                                                              | NA                   | 3.269240392 | 3.269240392 | 7.45E-07    |
| similar to myoferlin isoform b                                                            | LOC679806            | 3.343665326 | 3.343665326 | 6.13E-07    |
| CCR4 carbon catabolite repression 4-like (S. cerevisiae)                                  | Ccrn4l               | 3.38858723  | 3.38858723  | 7.73E-06    |
| hypothetical LOC298504 (predicted)                                                        | RGD1310174_predicted | 3.402352599 | 3.402352599 | 1.14E-06    |
| similar to MASK-4E-BP3 protein                                                            | LOC679725            | 3.458587815 | 3.458587815 | 4.03E-07    |

|                                                                   |                      |                    |                    |                 |
|-------------------------------------------------------------------|----------------------|--------------------|--------------------|-----------------|
| interferon, alpha-inducible protein (clone IFI-15K) (predicted)   | G1p2_predicted       | 3.50350591         | 3.50350591         | 1.31E-05        |
| unknwon gene                                                      | NA                   | 3.739352236        | 3.739352236        | 1.55E-05        |
| similar to retinoid binding protein 7 (predicted)                 | RGD1562168_predicted | 4.103689998        | 4.103689998        | 2.44E-06        |
| alpha-2-macroglobulin                                             | A2m                  | 4.21849825         | 4.21849825         | 1.63E-06        |
| zinc finger protein 354A                                          | Zfp354a              | 4.288363943        | 4.288363943        | 4.20E-07        |
| solute carrier family 5 (sodium/glucose cotransporter), member 11 | Slc5a11              | 4.505495582        | 4.505495582        | 5.84E-07        |
| <u>carboxylesterase 2 (intestine, liver)</u>                      | <u>Ces2</u>          | <u>6.099239765</u> | <u>6.099239765</u> | <u>2.51E-05</u> |

\* Genes up- or down-regulated by over 2-fold are shown.
