# Supplementary material
Source: PubMed Central journal article supplement (PMC2940476)
Supplement: me.2010-0192_2.pdf [file me.2010-0192_2.pdf]

**Supplementary Table 2. The genes regulated by AICAR treatment in the rat liver**

| Gene Name*                                                                                                    | Gene Symbol          | Mean         | Median       | p-Value     |
|---------------------------------------------------------------------------------------------------------------|----------------------|--------------|--------------|-------------|
| unknown gene                                                                                                  | NA                   | -3.423260827 | -3.423260827 | 1.37E-05    |
| aspartyl aminopeptidase                                                                                       | Dnpep                | -2.767715661 | -2.767715661 | 3.59E-05    |
| RT1 class Ib gene, H2-TL-like, grc region (N1)                                                                | RT1-N1               | -2.636064538 | -2.636064538 | 3.11E-05    |
| unknown gene                                                                                                  | NA                   | -2.299878374 | -2.299878374 | 0.000113324 |
| hypothetical protein LOC680687                                                                                | LOC680687            | -2.209012228 | -2.209012228 | 0.000531042 |
| hepcidin antimicrobial peptide                                                                                | Hamp                 | -2.166576105 | -2.166576105 | 3.11E-05    |
| development and differentiation enhancing (predicted)                                                         | Ddef1_predicted      | -2.123611743 | -2.123611743 | 1.64E-05    |
| RT1 class I, CE12                                                                                             | RT1-CE12             | -1.962518249 | -1.962518249 | 0.000224923 |
| alpha-2-macroglobulin                                                                                         | A2m                  | -1.885711115 | -1.885711115 | 0.000143511 |
| one cut domain, family member 1                                                                               | Onecut1              | -1.839204674 | -1.839204674 | 4.74E-06    |
| serine (or cysteine) peptidase inhibitor, clade A (alpha-1 antipeptidase, antitrypsin), member 7              | Serpina7             | -1.821761207 | -1.821761207 | 5.69E-05    |
| unknown gene                                                                                                  | NA                   | -1.793545436 | -1.793545436 | 4.11E-06    |
| lysyl oxidase                                                                                                 | Lox                  | -1.78884158  | -1.78884158  | 6.49E-07    |
| lysyl oxidase                                                                                                 | Lox                  | -1.743733328 | -1.743733328 | 8.28E-06    |
| similar to F-box only protein 3 isoform 1                                                                     | LOC690634            | -1.672687692 | -1.672687692 | 1.18E-06    |
| unknown gene                                                                                                  | NA                   | -1.66062916  | -1.66062916  | 4.43E-05    |
| unknown gene                                                                                                  | NA                   | -1.637328556 | -1.637328556 | 0.000138394 |
| unknown gene                                                                                                  | NA                   | -1.619044407 | -1.619044407 | 0.000107615 |
| phospholipase C, beta 1                                                                                       | Plec1                | -1.597244861 | -1.597244861 | 3.66E-05    |
| cytochrome P450, family 26, subfamily b, polypeptide 1                                                        | Cyp26b1              | -1.594838205 | -1.594838205 | 5.76E-06    |
| unknown gene                                                                                                  | NA                   | -1.587168937 | -1.587168937 | 0.00107012  |
| syncollin                                                                                                     | Sycn                 | -1.538924155 | -1.538924155 | 4.89E-05    |
| similar to hypothetical protein MGC42105 (predicted)                                                          | RGD1308116_predicted | -1.464232165 | -1.464232165 | 0.002742295 |
| peroxisomal membrane protein 4                                                                                | Pxmp4                | -1.438923704 | -1.438923704 | 0.001861313 |
| RT1 class II, locus Bb                                                                                        | RT1-Bb               | -1.427358385 | -1.427358385 | 5.73E-05    |
| Murinoglobulin 1 homolog (mouse)                                                                              | Mug1                 | -1.395316999 | -1.395316999 | 0.000421804 |
| similar to liver-specific bHLH-Zip transcription factor                                                       | LOC685277            | -1.38949769  | -1.38949769  | 1.89E-06    |
| epoxide hydrolase 2, cytoplasmic                                                                              | Ephx2                | -1.384129879 | -1.384129879 | 8.38E-08    |
| unknown gene                                                                                                  | NA                   | -1.320458391 | -1.320458391 | 7.36E-05    |
| unknown gene                                                                                                  | NA                   | -1.317246028 | -1.317246028 | 0.001035939 |
| N-acetyltransferase 8 (camello like)                                                                          | Nat8                 | -1.313945283 | -1.313945283 | 7.62E-05    |
| similar to 20-alpha-hydroxysteroid dehydrogenase (predicted)                                                  | RGD1564865_predicted | -1.31122327  | -1.31122327  | 2.99E-06    |
| adenosine A2B receptor                                                                                        | Adora2b              | -1.305311082 | -1.305311082 | 1.55E-05    |
| dual specificity phosphatase 6                                                                                | Dusp6                | -1.297883934 | -1.297883934 | 4.68E-06    |
| sulfotransferase family, cytosolic, 1C, member 2                                                              | Sult1c2              | -1.282552237 | -1.282552237 | 0.000147917 |
| similar to immunoglobulin heavy chain 6 (Igh-6)                                                               | RGD1359202           | -1.273304536 | -1.273304536 | 0.000715208 |
| carbonic anhydrase 1 (predicted)                                                                              | Car1_predicted       | -1.269758922 | -1.269758922 | 3.39E-06    |
| serine dehydratase                                                                                            | Sds                  | -1.255907209 | -1.255907209 | 1.51E-05    |
| unknown gene                                                                                                  | NA                   | -1.249196843 | -1.249196843 | 0.000881702 |
| neuronal regeneration related protein                                                                         | Nrep                 | -1.242300215 | -1.242300215 | 1.56E-06    |
| unknown gene                                                                                                  | NA                   | -1.228149712 | -1.228149712 | 2.49E-05    |
| similar to indolethylamine N-methyltransferase                                                                | LOC368066            | -1.224895977 | -1.224895977 | 0.000132652 |
| unknown gene                                                                                                  | NA                   | -1.216284954 | -1.216284954 | 0.000217658 |
| cytochrome P450, family 17, subfamily a, polypeptide 1                                                        | Cyp17a1              | -1.215700929 | -1.215700929 | 2.89E-07    |
| similar to Small inducible cytokine B13 precursor (CXCL13) (B lymphocyte chemoattractant) (CXC chemokine BLC) | LOC498335            | -1.193902963 | -1.193902963 | 2.40E-05    |
| aldehyde dehydrogenase family 1, member A1                                                                    | Aldh1a1              | -1.168395499 | -1.168395499 | 0.000103328 |
| alpha-methylacyl-CoA racemase                                                                                 | Amacr                | -1.163597025 | -1.163597025 | 7.20E-05    |
| synovial sarcoma, X breakpoint 2 interacting protein                                                          | Ssx2ip               | -1.158987684 | -1.158987684 | 0.000142626 |
| unknown gene                                                                                                  | NA                   | -1.152359441 | -1.152359441 | 0.000158827 |
| carbonic anhydrase 3                                                                                          | Ca3                  | -1.150770608 | -1.150770608 | 5.46E-05    |

|                                                                                               |                      |              |              |             |
|-----------------------------------------------------------------------------------------------|----------------------|--------------|--------------|-------------|
| ELAV (embryonic lethal, abnormal vision, Drosophila)-like 1 (Hu antigen R) (predicted)        | Elavl1_predicted     | -1.149846678 | -1.149846678 | 6.56E-06    |
| unknown gene                                                                                  | NA                   | -1.148841454 | -1.148841454 | 0.003269327 |
| unknown gene                                                                                  | NA                   | -1.145133085 | -1.145133085 | 0.000677855 |
| unknown gene                                                                                  | NA                   | -1.139363074 | -1.139363074 | 0.001224547 |
| dermatopontin (predicted)                                                                     | Dpt_predicted        | -1.13350913  | -1.13350913  | 1.32E-05    |
| unknown gene                                                                                  | NA                   | -1.130925289 | -1.130925289 | 8.61E-05    |
| unknown gene                                                                                  | NA                   | -1.125975022 | -1.125975022 | 0.001981349 |
| apolipoprotein B editing complex 1                                                            | Apobec1              | -1.125127285 | -1.125127285 | 0.000105634 |
| PDZ domain containing RING finger 3 (predicted)                                               | Pdzrn3_predicted     | -1.112054187 | -1.112054187 | 0.000631358 |
| Unknown gene                                                                                  | NA                   | -1.108779755 | -1.108779755 | 0.002302176 |
| enoyl-Coenzyme A, hydratase/3-hydroxyacyl Coenzyme A dehydrogenase                            | Ehhadh               | -1.10868786  | -1.10868786  | 4.98E-05    |
| cyclin D1                                                                                     | Ccnd1                | -1.090306487 | -1.090306487 | 1.30E-06    |
| similar to SR rich protein                                                                    | RGD1307395           | -1.087084873 | -1.087084873 | 0.000133883 |
| transmembrane protein 2 (predicted)                                                           | Tmem2_predicted      | -1.082083932 | -1.082083932 | 0.002238583 |
| acyl-Coenzyme A oxidase 2, branched chain                                                     | Acox2                | -1.077081169 | -1.077081169 | 1.34E-05    |
| chemokine (C-X-C motif) ligand 1                                                              | Cxcl1                | -1.076813511 | -1.076813511 | 0.000698495 |
| candidate mediator of the p53-dependent G2 arrest                                             | Rprm                 | -1.07668894  | -1.07668894  | 4.43E-05    |
| solute carrier family 10, member 2                                                            | Slc10a2              | -1.075934112 | -1.075934112 | 6.27E-06    |
| carnitine O-octanoyltransferase                                                               | Crot                 | -1.072817839 | -1.072817839 | 0.000250085 |
| Unknown gene                                                                                  | NA                   | -1.06795631  | -1.06795631  | 0.000281557 |
| cyclin D1                                                                                     | Ccnd1                | -1.067211451 | -1.067211451 | 0.000228796 |
| Unknown gene                                                                                  | NA                   | -1.065799832 | -1.065799832 | 6.65E-06    |
| serum/glucocorticoid regulated kinase                                                         | Sgk                  | -1.065741894 | -1.065741894 | 2.49E-06    |
| Unknown gene                                                                                  | NA                   | -1.061919169 | -1.061919169 | 0.00017231  |
| Unknown gene                                                                                  | NA                   | -1.055511223 | -1.055511223 | 0.003962804 |
| Unknown gene                                                                                  | NA                   | -1.05277525  | -1.05277525  | 0.004469053 |
| filamin, beta (predicted)                                                                     | Flnb_predicted       | -1.052567696 | -1.052567696 | 0.00449697  |
| aldehyde dehydrogenase 1 family, member B1                                                    | Aldh1b1              | -1.041328095 | -1.041328095 | 0.00048473  |
| hypothetical LOC312654 (predicted)                                                            | RGD1311909_predicted | -1.039119168 | -1.039119168 | 0.000680477 |
| rat senescence marker protein 2A gene, exons 1 and 2                                          | Smp2a                | -1.037943451 | -1.037943451 | 0.001339963 |
| claudin 10 (predicted)                                                                        | Cldn10_predicted     | -1.030872961 | -1.030872961 | 0.000598064 |
| cysteine rich protein 61                                                                      | Cyr61                | -1.028681432 | -1.028681432 | 0.003179718 |
| similar to netrin G1 (predicted)                                                              | RGD1563465_predicted | -1.025397798 | -1.025397798 | 0.004509068 |
| similar to liver-specific bHLH-Zip transcription factor                                       | LOC685277            | -1.018665952 | -1.018665952 | 0.000814979 |
| myeloid/lymphoid or mixed-lineage leukemia,translocated to, 3 (trithorax homolog, Drosophila) | Mllt3                | -1.013107418 | -1.013107418 | 6.44E-05    |
| nuclear receptor subfamily 3, group C, member 1                                               | Nr3c1                | -1.009696734 | -1.009696734 | 0.000266919 |
| similar to TSC22 domain family protein 2 (TSC22-related-inducible leucine zipper protein 4)   | LOC499624            | -1.006035304 | -1.006035304 | 0.004055708 |
| retinol binding protein 1, cellular                                                           | Rbp1                 | -1.002709918 | -1.002709918 | 3.12E-05    |
| unknown gene                                                                                  | NA                   | 1.003052512  | 1.003052512  | 0.007462544 |
| regulated endocrine-specific protein 18                                                       | Resp18               | 1.003336777  | 1.003336777  | 0.00129165  |
| capping protein (actin filament), gelsolin-like                                               | Capg                 | 1.010005058  | 1.010005058  | 0.00031621  |
| pyruvate kinase, muscle                                                                       | Pkm2                 | 1.010029718  | 1.010029718  | 0.000527834 |
| keratin 10                                                                                    | Krt10                | 1.012331377  | 1.012331377  | 7.36E-05    |
| integrin alpha 1                                                                              | Itga1                | 1.018949855  | 1.018949855  | 0.000108094 |
| ADP-ribosyltransferase 2b                                                                     | Art2b                | 1.021722534  | 1.021722534  | 0.002416605 |
| nicotinate phosphoribosyltransferase domain containing 1                                      | Naprt1               | 1.023896999  | 1.023896999  | 0.000265444 |
| lectin, galactoside-binding, soluble, 3 binding protein                                       | Lgals3bp             | 1.030252991  | 1.030252991  | 6.64E-05    |
| insulin-like growth factor binding protein 1                                                  | Igfbp1               | 1.032837002  | 1.032837002  | 0.000111394 |
| integral membrane transport protein UST4r                                                     | UST4r                | 1.042059057  | 1.042059057  | 4.19E-05    |
| solute carrier family 6 (neurotransmitter transporter, glycine), member 9                     | Slc6a9               | 1.046282258  | 1.046282258  | 0.000535308 |
| lipoprotein lipase                                                                            | Lpl                  | 1.068481674  | 1.068481674  | 0.000199801 |
| orosomucoid 1                                                                                 | Orm1                 | 1.070962035  | 1.070962035  | 4.96E-06    |
| similar to Reticulocalbin-1 precursor                                                         | LOC502737            | 1.076642611  | 1.076642611  | 8.77E-05    |
| procollagen lysine, 2-oxoglutarate 5-dioxygenase 2                                            | Plod2                | 1.079632361  | 1.079632361  | 0.000911095 |
| microtubule-associated protein 7 (predicted)                                                  | Mtap7_predicted      | 1.087590816  | 1.087590816  | 0.002889721 |

|                                                                                                  |                      |             |             |             |
|--------------------------------------------------------------------------------------------------|----------------------|-------------|-------------|-------------|
| similar to Diphosphoinositol polyphosphate phosphohydrolase 3 alpha (DIPP-3 alpha) (DIPP3 alpha) | LOC680248            | 1.089426694 | 1.089426694 | 3.35E-05    |
| unknown gene                                                                                     | NA                   | 1.091099465 | 1.091099465 | 0.003480045 |
| chemokine (C-X-C motif) ligand 9                                                                 | Cxcl9                | 1.103651108 | 1.103651108 | 4.95E-05    |
| similar to nucleolar protein with MIF4G domain 1                                                 | LOC682058            | 1.105444584 | 1.105444584 | 3.39E-05    |
| cytochrome P450, family 8, subfamily b, polypeptide 1                                            | Cyp8b1               | 1.106401612 | 1.106401612 | 1.54E-05    |
| similar to killer activatory receptor-like protein p91D (predicted)                              | RGD1562625_predicted | 1.114607828 | 1.114607828 | 5.69E-05    |
| S100 calcium binding protein A6 (calcyclin)                                                      | S100a6               | 1.150322169 | 1.150322169 | 0.000403115 |
| aldo-keto reductase family 1, member C6                                                          | Akr1c6               | 1.164459731 | 1.164459731 | 5.76E-06    |
| unknown gene                                                                                     | NA                   | 1.171038101 | 1.171038101 | 0.000698897 |
| chemokine (C-X-C motif) ligand 9                                                                 | Cxcl9                | 1.174764811 | 1.174764811 | 1.51E-08    |
| microfibrillar-associated protein 4                                                              | Mfap4                | 1.183189551 | 1.183189551 | 0.001138222 |
| similar to ecotropic viral integration site 2A                                                   | LOC685433            | 1.188875945 | 1.188875945 | 0.005807165 |
| solute carrier family 30 (zinc transporter), member 2                                            | Slc30a2              | 1.191961721 | 1.191961721 | 0.002069689 |
| aryl hydrocarbon receptor                                                                        | Ahr                  | 1.204095162 | 1.204095162 | 7.74E-06    |
| RT1 class II, locus Da                                                                           | RT1-Da               | 1.206663509 | 1.206663509 | 5.69E-06    |
| prolylcarboxypeptidase (angiotensinase C) (predicted)                                            | Prp_predicted        | 1.219124305 | 1.219124305 | 0.005727018 |
| lectin, galactose binding, soluble 1                                                             | Lgals1               | 1.235449253 | 1.235449253 | 1.14E-05    |
| lectin, galactose binding, soluble 3                                                             | Lgals3               | 1.240445296 | 1.240445296 | 6.42E-06    |
| reticulocalbin 1 (predicted)                                                                     | Rcn1_predicted       | 1.263112942 | 1.263112942 | 0.00115911  |
| interleukin enhancer binding factor 3                                                            | Ilf3                 | 1.27097377  | 1.27097377  | 0.000281707 |
| unknown gene                                                                                     | NA                   | 1.286653638 | 1.286653638 | 0.000841458 |
| unknown gene                                                                                     | NA                   | 1.301952325 | 1.301952325 | 1.19E-05    |
| RT1 class II, locus Bb                                                                           | RT1-Bb               | 1.308940409 | 1.308940409 | 0.00010959  |
| unknown gene                                                                                     | NA                   | 1.338818412 | 1.338818412 | 0.000325035 |
| thyroid hormone responsive protein                                                               | Thrsp                | 1.351519543 | 1.351519543 | 1.22E-06    |
| procollagen, type 1, alpha 1                                                                     | Col1a1               | 1.365722314 | 1.365722314 | 0.000108671 |
| similar to RIKEN cDNA 4632417N05 (predicted)                                                     | RGD1308481_predicted | 1.367960613 | 1.367960613 | 1.25E-05    |
| hydroxysteroid (17-beta) dehydrogenase 9                                                         | Hsd17b9              | 1.3783708   | 1.3783708   | 4.03E-05    |
| RT1 class Ib, locus Aw2                                                                          | RT1-Aw2              | 1.390933728 | 1.390933728 | 0.005156243 |
| metallothionein 1a                                                                               | Mt1a                 | 1.39745468  | 1.39745468  | 1.64E-05    |
| unknown gene                                                                                     | NA                   | 1.402153766 | 1.402153766 | 3.67E-06    |
| thyroid hormone responsive protein                                                               | Thrsp                | 1.41699897  | 1.41699897  | 4.20E-06    |
| RT1 class Ib, locus Aw2                                                                          | RT1-Aw2              | 1.421629909 | 1.421629909 | 1.72E-05    |
| nuclear receptor subfamily 1, group D, member 1                                                  | Nr1d1                | 1.433451835 | 1.433451835 | 0.001673906 |
| unknown gene                                                                                     | NA                   | 1.448741365 | 1.448741365 | 9.07E-06    |
| dual specificity phosphatase 1                                                                   | Dusp1                | 1.46300805  | 1.46300805  | 7.52E-05    |
| unknown gene                                                                                     | NA                   | 1.464516737 | 1.464516737 | 0.000906557 |
| unknown gene                                                                                     | NA                   | 1.478596075 | 1.478596075 | 7.33E-07    |
| unknown gene                                                                                     | NA                   | 1.487350981 | 1.487350981 | 0.00057783  |
| hepatic protein EIIIH                                                                            | Eiih                 | 1.492572417 | 1.492572417 | 5.12E-06    |
| ubiquitin D                                                                                      | Ubd                  | 1.509036814 | 1.509036814 | 1.58E-05    |
| similar to paired immunoglobulin-like type 2 receptor alpha                                      | LOC685020            | 1.516286059 | 1.516286059 | 8.36E-05    |
| thyroid hormone responsive protein                                                               | Thrsp                | 1.517992233 | 1.517992233 | 1.70E-06    |
| glycoprotein (transmembrane) nmb                                                                 | Gpnmb                | 1.53452046  | 1.53452046  | 4.59E-05    |
| similar to myo-inositol 1-phosphate synthase A1                                                  | LOC290651            | 1.5804253   | 1.5804253   | 0.000163209 |
| lumican                                                                                          | Lum                  | 1.610766523 | 1.610766523 | 5.57E-05    |
| similar to chromosome 17 open reading frame 27                                                   | LOC688296            | 1.705693101 | 1.705693101 | 0.000471035 |
| protocadherin alpha 4                                                                            | Pcdha4               | 1.84361225  | 1.84361225  | 0.000218366 |
| similar to Metallothionein-2 (MT-2) (Metallothionein-II) (MT-II)                                 | LOC689415            | 1.858190924 | 1.858190924 | 2.26E-07    |
| myxovirus (influenza virus) resistance 2                                                         | Mx2                  | 1.858276846 | 1.858276846 | 4.60E-05    |
| abhydrolase domain containing 3 (predicted)                                                      | Abhd3_predicted      | 1.915300322 | 1.915300322 | 0.000660823 |
| phospholipase A2, group IIA (platelets, synovial fluid)                                          | Pla2g2a              | 1.962449102 | 1.962449102 | 4.22E-05    |
| tissue inhibitor of metalloproteinase 1                                                          | Timp1                | 2.053312245 | 2.053312245 | 1.10E-05    |
| NAD(P)H dehydrogenase, quinone 1                                                                 | Nqo1                 | 2.063984417 | 2.063984417 | 1.21E-07    |
| cytochrome P450, family 7, subfamily a, polypeptide 1                                            | Cyp7a1               | 2.108664652 | 2.108664652 | 2.58E-06    |

|                                                                    |           |             |             |             |
|--------------------------------------------------------------------|-----------|-------------|-------------|-------------|
| RT1 class II, locus Ba                                             | RT1-Ba    | 2.326897698 | 2.326897698 | 7.93E-06    |
| protocadherin alpha 4                                              | Pcdha4    | 2.37689204  | 2.37689204  | 1.44E-08    |
| similar to Sulfide:quinone oxidoreductase, mitochondrial precursor | LOC691966 | 2.64720803  | 2.64720803  | 0.000365799 |
| RT1 class Ib, locus Aw2                                            | RT1-Aw2   | 2.702473306 | 2.702473306 | 2.93E-07    |
| lipopolysaccharide binding protein                                 | Lbp       | 2.882621416 | 2.882621416 | 1.13E-06    |
| serine protease inhibitor, Kazal type 1                            | Spink1    | 3.121455981 | 3.121455981 | 2.40E-05    |
| WDM1 homolog                                                       | LOC360228 | 3.470666205 | 3.470666205 | 1.14E-07    |
| serine protease inhibitor, Kazal type 1                            | Spink1    | 3.859106329 | 3.859106329 | 2.80E-05    |
| lipocalin 2                                                        | Lcn2      | 5.878918798 | 5.878918798 | 2.74E-08    |

\* Genes up- or down-regulated by over 2-fold are shown.
