# Supplementary material
Source: PubMed Central journal article supplement (PMC2940476)
Supplement: me.2010-0192_3.pdf [file me.2010-0192_3.pdf]

**Supplementary Table 3. The genes regulated by dexamethasone and AICAR treatment in the rat liver**

| Gene Name*                                                                                            | Gene Symbol          | Mean         | Median       | p-Value    |
|-------------------------------------------------------------------------------------------------------|----------------------|--------------|--------------|------------|
| Cd5 antigen-like                                                                                      | Cd5l                 | -6.963810854 | -6.963810854 | 3.49E-08   |
| chemokine (C-C motif) ligand 6                                                                        | Ccl6                 | -5.769641193 | -5.769641193 | 2.35E-07   |
| complement component 1, q subcomponent, beta polypeptide                                              | C1qb                 | -5.423493864 | -5.423493864 | 0.00015815 |
| complement component 1, q subcomponent, alpha polypeptide                                             | C1qa                 | -5.16580036  | -5.16580036  | 1.12E-06   |
| RT1 class II, locus Bb                                                                                | RT1-Bb               | -4.816885841 | -4.816885841 | 3.78E-05   |
| RT1 class Ib, locus Aw2                                                                               | RT1-Aw2              | -4.6803517   | -4.6803517   | 1.22E-07   |
| C-type lectin domain family 4, member f                                                               | Clec4f               | -4.64300143  | -4.64300143  | 5.27E-07   |
| SH3 and cysteine rich domain 3 (predicted)                                                            | Stac3_predicted      | -4.541304296 | -4.541304296 | 9.15E-07   |
| ribonucleotide reductase M2 (mapped)                                                                  | Rrm2                 | -4.493093171 | -4.493093171 | 1.89E-06   |
| allograft inflammatory factor 1                                                                       | Aif1                 | -4.430588687 | -4.430588687 | 1.56E-05   |
| ficolin A                                                                                             | Fcna                 | -4.370945722 | -4.370945722 | 3.16E-05   |
| complement component 1, q subcomponent, gamma polypeptide                                             | C1qg                 | -4.357618774 | -4.357618774 | 0.00046502 |
| similar to paired immunoglobulin-like type 2 receptor alpha                                           | LOC685020            | -4.273456637 | -4.273456637 | 8.69E-06   |
| EGF-like module containing, mucin-like, hormone receptor-like sequence 1                              | Emr1                 | -3.967634048 | -3.967634048 | 1.47E-05   |
| cytochrome b-245, beta polypeptide                                                                    | Cybb                 | -3.86839397  | -3.86839397  | 3.67E-05   |
| nuclear receptor subfamily 0, group B, member 2                                                       | Nr0b2                | -3.857620768 | -3.857620768 | 5.90E-06   |
| unknown gene                                                                                          | NA                   | -3.782569916 | -3.782569916 | 0.00030753 |
| CD163 antigen (predicted)                                                                             | Cd163_predicted      | -3.759257772 | -3.759257772 | 5.87E-06   |
| annexin A3                                                                                            | Anxa3                | -3.669128045 | -3.669128045 | 6.26E-07   |
| CD163 antigen (predicted)                                                                             | Cd163_predicted      | -3.573066952 | -3.573066952 | 2.47E-05   |
| RT1 class II, locus Da                                                                                | RT1-Da               | -3.478259816 | -3.478259816 | 3.87E-07   |
| colony stimulating factor 1 receptor                                                                  | Csflr                | -3.426246626 | -3.426246626 | 8.75E-06   |
| retinoic acid receptor responder (tazarotene induced) 1                                               | Rarres1              | -3.362981653 | -3.362981653 | 1.30E-06   |
| arginine vasopressin receptor 1A                                                                      | Avpr1a               | -3.362449046 | -3.362449046 | 3.87E-06   |
| guanylate nucleotide binding protein 2                                                                | Gbp2                 | -3.327561328 | -3.327561328 | 8.04E-05   |
| phospholipase A2, group IIA (platelets, synovial fluid)                                               | Pla2g2a              | -3.319858189 | -3.319858189 | 1.07E-05   |
| membrane-spanning 4-domains, subfamily A, member 11 (predicted)                                       | Ms4a11_predicted     | -3.318918143 | -3.318918143 | 0.00021547 |
| prostaglandin-endoperoxide synthase 1                                                                 | Ptgs1                | -3.305097829 | -3.305097829 | 3.23E-05   |
| cathepsin S                                                                                           | Ctss                 | -3.256600301 | -3.256600301 | 1.96E-05   |
| similar to NADH dehydrogenase (ubiquinone) Fe-S protein 2                                             | LOC498279            | -3.228727244 | -3.228727244 | 3.92E-05   |
| CD74 antigen (invariant polypeptide of major histocompatibility complex, class II antigen-associated) | Cd74                 | -3.228197784 | -3.228197784 | 3.17E-06   |
| unknown gene                                                                                          | NA                   | -3.156217553 | -3.156217553 | 3.09E-05   |
| Fc receptor, IgG, low affinity III                                                                    | Fcgr3                | -3.065090703 | -3.065090703 | 2.75E-07   |
| RT1 class II, locus Bb                                                                                | RT1-Bb               | -3.018494314 | -3.018494314 | 1.49E-07   |
| cyclin A2                                                                                             | Ccna2                | -3.001280243 | -3.001280243 | 0.00019902 |
| v-raf murine sarcoma 3611 viral oncogene homolog                                                      | Araf                 | -2.987797854 | -2.987797854 | 0.00111294 |
| CD68 antigen                                                                                          | Cd68                 | -2.952267751 | -2.952267751 | 4.18E-05   |
| RT1 class II, locus Ba                                                                                | RT1-Ba               | -2.925178437 | -2.925178437 | 6.35E-06   |
| cyclin-dependent kinase inhibitor 3 (predicted)                                                       | Cdkn3_predicted      | -2.890028372 | -2.890028372 | 0.00032085 |
| membrane-spanning 4-domains, subfamily A, member 6B                                                   | Ms4a6b               | -2.880606912 | -2.880606912 | 2.28E-06   |
| neuronal regeneration related protein                                                                 | Nrep                 | -2.857860701 | -2.857860701 | 1.36E-07   |
| lipopolysaccharide binding protein                                                                    | Lbp                  | -2.84882248  | -2.84882248  | 1.44E-06   |
| complement factor D (adipsin)                                                                         | Cfd                  | -2.837870541 | -2.837870541 | 0.00225577 |
| Fc fragment of IgG, low affinity IIIa, receptor                                                       | Fcgr3a               | -2.832606426 | -2.832606426 | 8.25E-06   |
| protein kinase C, beta 1                                                                              | Prkcb1               | -2.829742259 | -2.829742259 | 4.40E-07   |
| nuclear receptor subfamily 1, group D, member 2                                                       | Nr1d2                | -2.820340024 | -2.820340024 | 2.57E-06   |
| RT1 class II, locus Ba                                                                                | RT1-Ba               | -2.804996032 | -2.804996032 | 4.34E-05   |
| unknown gene                                                                                          | NA                   | -2.802116337 | -2.802116337 | 6.19E-07   |
| RGD1566254 (predicted)                                                                                | RGD1566254_predicted | -2.77146063  | -2.77146063  | 3.56E-05   |
| chemokine (C-X-C motif) ligand 12                                                                     | Cxcl12               | -2.747624214 | -2.747624214 | 8.21E-06   |

sulfotransferase family, cytosolic, 1C, member 1  
nuclear receptor subfamily 1, group D, member 2  
ect2 oncogene (predicted)  
regulator of G-protein signaling 18  
RT1 class Ib, locus Aw2  
lymphocyte antigen 86 (predicted)  
NS5A (hepatitis C virus) transactivated protein 9  
ubiquitin D  
dendritic cell inhibitory receptor 3  
annexin A3  
cyclin B1  
NADPH oxidase 4  
fibrinogen-like 2  
serine protease inhibitor, Kazal type 1  
Fc receptor, IgG, low affinity III  
integrin alpha L  
CD53 antigen  
cell division cycle 2 homolog A (S. pombe)  
similar to aldo-keto reductase family 1, member C12 (predicted)  
glucose-6-phosphatase, catalytic  
protein tyrosine phosphatase, receptor type, C  
chemokine (C-X-C motif) ligand 12  
RT1 class Ib, locus Aw2  
hydroxysteroid (17-beta) dehydrogenase 2  
pleckstrin homology domain containing, family B (evectins) member 1  
steroid 5 alpha-reductase 1  
CD38 antigen  
similar to Ab2-095  
growth arrest specific 6  
serine protease inhibitor, Kazal type 1  
unknown gene  
ATP-binding cassette, sub-family G (WHITE), member 5  
unknown gene  
fatty acid desaturase 1  
integrin beta 2  
cyclin B1  
unknown gene  
similar to killer activatory receptor-like protein p91D (predicted)  
ribonuclease, RNase A family 4  
unknown gene  
aldo-keto reductase family 7, member A3 (aflatoxin aldehyde reductase)  
Axl receptor tyrosine kinase  
secretory leukocyte peptidase inhibitor  
pregnancy-induced growth inhibitor  
hypothetical protein LOC690768  
stearoyl-Coenzyme A desaturase 1  
serine (or cysteine) peptidase inhibitor, clade A (alpha-1 antipeptidase, antitrypsin), member 7  
solute carrier family 1 (glial high affinity glutamate transporter), member 3  
cyclin B2  
ADP-ribosyltransferase 2b  
protocadherin alpha 4  
immunoglobulin superfamily, member 6  
C-type (calcium dependent, carbohydrate recognition domain) lectin, superfamily member 6  
nuclear receptor subfamily 1, group D, member 1  
interleukin 1 beta

|                      |              |              |            |
|----------------------|--------------|--------------|------------|
| Sult1c1              | -2.73128432  | -2.73128432  | 2.89E-07   |
| Nr1d2                | -2.706685195 | -2.706685195 | 6.53E-05   |
| Ect2_predicted       | -2.701953251 | -2.701953251 | 2.38E-05   |
| Rgs18                | -2.694809053 | -2.694809053 | 1.11E-05   |
| RT1-Aw2              | -2.688413162 | -2.688413162 | 6.32E-07   |
| Ly86_predicted       | -2.649619624 | -2.649619624 | 0.00025301 |
| Ns5atp9              | -2.635594675 | -2.635594675 | 3.76E-07   |
| Ubd                  | -2.635470982 | -2.635470982 | 3.51E-06   |
| Dc1r3                | -2.622839239 | -2.622839239 | 0.00041405 |
| Anxa3                | -2.615571702 | -2.615571702 | 0.00017547 |
| Ccnb1                | -2.607439618 | -2.607439618 | 2.13E-05   |
| Nox4                 | -2.605872342 | -2.605872342 | 1.51E-05   |
| Fgl2                 | -2.603806132 | -2.603806132 | 6.97E-06   |
| Spink1               | -2.578804273 | -2.578804273 | 3.25E-07   |
| Fcgr3                | -2.576968545 | -2.576968545 | 5.12E-05   |
| Itgal                | -2.568222889 | -2.568222889 | 0.00012711 |
| Cd53                 | -2.558039665 | -2.558039665 | 2.96E-06   |
| Cdc2a                | -2.51630032  | -2.51630032  | 0.00065824 |
| RGD1562954_predicted | -2.504476298 | -2.504476298 | 8.69E-07   |
| G6pc                 | -2.500830551 | -2.500830551 | 1.58E-06   |
| Ptprc                | -2.486252329 | -2.486252329 | 3.56E-05   |
| Cxcl12               | -2.470173268 | -2.470173268 | 4.11E-05   |
| RT1-Aw2              | -2.451188482 | -2.451188482 | 3.96E-05   |
| Hsd17b2              | -2.428304709 | -2.428304709 | 2.09E-07   |
| Plekhhb1             | -2.424417955 | -2.424417955 | 2.62E-06   |
| Srd5a1               | -2.422837623 | -2.422837623 | 2.35E-06   |
| Cd38                 | -2.396376764 | -2.396376764 | 4.40E-05   |
| RGD1309079           | -2.374305146 | -2.374305146 | 6.32E-06   |
| Gas6                 | -2.363516325 | -2.363516325 | 2.35E-05   |
| Spink1               | -2.334803576 | -2.334803576 | 8.68E-07   |
| NA                   | -2.331736138 | -2.331736138 | 8.04E-06   |
| Abcg5                | -2.327419512 | -2.327419512 | 0.00035248 |
| NA                   | -2.310652557 | -2.310652557 | 0.0004505  |
| Fads1                | -2.302906154 | -2.302906154 | 1.33E-06   |
| Itgb2                | -2.296235685 | -2.296235685 | 6.16E-05   |
| Ccnb1                | -2.287295752 | -2.287295752 | 0.00021606 |
| NA                   | -2.271663164 | -2.271663164 | 1.17E-05   |
| RGD1562625_predicted | -2.249738936 | -2.249738936 | 5.34E-05   |
| Rnase4               | -2.24800642  | -2.24800642  | 9.72E-07   |
| NA                   | -2.239132555 | -2.239132555 | 4.04E-06   |
| Akr7a3               | -2.232451301 | -2.232451301 | 8.50E-07   |
| Axl                  | -2.230030373 | -2.230030373 | 0.00045407 |
| Slpi                 | -2.227808162 | -2.227808162 | 9.03E-08   |
| Ok138                | -2.211140372 | -2.211140372 | 2.77E-07   |
| LOC690768            | -2.210738714 | -2.210738714 | 1.67E-05   |
| Scd1                 | -2.209501566 | -2.209501566 | 1.58E-06   |
| Serpina7             | -2.209351849 | -2.209351849 | 1.53E-05   |
| Slc1a3               | -2.198604194 | -2.198604194 | 3.80E-05   |
| Ccnb2                | -2.196100653 | -2.196100653 | 6.06E-05   |
| Art2b                | -2.170972181 | -2.170972181 | 0.00031448 |
| Pcdha4               | -2.155072864 | -2.155072864 | 6.43E-07   |
| Igsf6                | -2.150944817 | -2.150944817 | 0.00028991 |
| Clecsf6              | -2.148764428 | -2.148764428 | 0.00078719 |
| Nr1d1                | -2.142884374 | -2.142884374 | 0.00045199 |
| Il1b                 | -2.124248262 | -2.124248262 | 0.00383957 |

|                                                                                                  |                 |              |              |            |
|--------------------------------------------------------------------------------------------------|-----------------|--------------|--------------|------------|
| phospholipase A2, group IVA (cytosolic, calcium-dependent)                                       | Pla2g4a         | -2.119699687 | -2.119699687 | 0.000448   |
| unknown gene                                                                                     | NA              | -2.112698384 | -2.112698384 | 0.00020568 |
| chemokine (C-X-C motif) ligand 12                                                                | Cxcl12          | -2.108649662 | -2.108649662 | 1.02E-05   |
| PYD and CARD domain containing                                                                   | Pycard          | -2.095323189 | -2.095323189 | 0.00019376 |
| ribonucleotide reductase M2 (mapped)                                                             | Rrm2            | -2.078859741 | -2.078859741 | 0.00010911 |
| cytochrome b-245, alpha polypeptide                                                              | Cyba            | -2.075195543 | -2.075195543 | 6.55E-07   |
| steroid sensitive gene 1                                                                         | Ssg1            | -2.065868023 | -2.065868023 | 7.41E-07   |
| unknown gene                                                                                     | NA              | -2.065665614 | -2.065665614 | 0.0011035  |
| similar to indolethylamine N-methyltransferase                                                   | LOC368066       | -2.055669825 | -2.055669825 | 0.00014717 |
| unknown gene                                                                                     | NA              | -2.051808214 | -2.051808214 | 3.58E-06   |
| B-cell leukemia/lymphoma 2 related protein A1                                                    | Bcl2a1          | -2.050077313 | -2.050077313 | 1.61E-06   |
| annexin A3                                                                                       | Anxa3           | -2.023692137 | -2.023692137 | 0.00025629 |
| glucose-6-phosphatase, catalytic                                                                 | G6pc            | -2.009146725 | -2.009146725 | 2.31E-07   |
| antigen identified by monoclonal antibody Ki-67 (predicted)                                      | Mki67_predicted | -2.004172307 | -2.004172307 | 0.00101446 |
| Fc receptor, IgG, high affinity I                                                                | Fcgr1           | -2.003954464 | -2.003954464 | 0.00037591 |
| TRAF2 binding protein                                                                            | LOC310877       | -2.003837892 | -2.003837892 | 0.00043168 |
| malic enzyme 1                                                                                   | Me1             | -1.990049052 | -1.990049052 | 3.68E-07   |
| unknown gene                                                                                     | NA              | -1.989211295 | -1.989211295 | 2.36E-06   |
| RT1 class Ib, locus Aw2                                                                          | RT1-Aw2         | -1.967836754 | -1.967836754 | 0.00130138 |
| unknown gene                                                                                     | NA              | -1.957953219 | -1.957953219 | 0.00449035 |
| unknown gene                                                                                     | NA              | -1.946347299 | -1.946347299 | 1.12E-05   |
| unknown gene                                                                                     | NA              | -1.944411016 | -1.944411016 | 3.73E-06   |
| similar to Reticulocalbin-1 precursor                                                            | LOC502737       | -1.921256335 | -1.921256335 | 6.70E-06   |
| similar to KIAA0367                                                                              | RGD1311350      | -1.903749676 | -1.903749676 | 0.0001406  |
| lecithin-retinol acyltransferase (phosphatidylcholine-retinol-O-acyltransferase)                 | Lrat            | -1.896734253 | -1.896734253 | 2.89E-05   |
| Cytochrome P450, family 2, subfamily b, polypeptide 2                                            | Cyp2b2          | -1.895885737 | -1.895885737 | 1.55E-06   |
| thyroid hormone responsive protein                                                               | Thrsp           | -1.8897756   | -1.8897756   | 3.72E-08   |
| solute carrier organic anion transporter family, member 1a4                                      | Sleo1a4         | -1.871893625 | -1.871893625 | 6.39E-07   |
| kelch-like 24 (Drosophila)                                                                       | Klhl24          | -1.871464606 | -1.871464606 | 8.02E-05   |
| unknown gene                                                                                     | NA              | -1.865760594 | -1.865760594 | 0.00166066 |
| TRAF4 associated factor 1                                                                        | Traf4af1        | -1.860450126 | -1.860450126 | 0.0001947  |
| similar to RIKEN cDNA 6530401L14 gene                                                            | RGD1309107      | -1.856963841 | -1.856963841 | 0.00036296 |
| ornithine aminotransferase                                                                       | Oat             | -1.856250305 | -1.856250305 | 2.39E-06   |
| kynurenine 3-monooxygenase (kynurenine 3-hydroxylase)                                            | Kmo             | -1.855745004 | -1.855745004 | 1.30E-06   |
| phospholipid transfer protein (predicted)                                                        | Pltp_predicted  | -1.852304848 | -1.852304848 | 0.00021077 |
| similar to Diphosphoinositol polyphosphate phosphohydrolase 3 alpha (DIPP-3 alpha) (DIPP3 alpha) | LOC680248       | -1.850211008 | -1.850211008 | 6.53E-07   |
| fibrinogen-like 2                                                                                | Fgl2            | -1.846423014 | -1.846423014 | 6.42E-06   |
| lymphocyte antigen 6 complex, locus B                                                            | Ly6b            | -1.845847036 | -1.845847036 | 0.00063574 |
| ATP-binding cassette, sub-family G (WHITE), member 8                                             | Abcg8           | -1.844051662 | -1.844051662 | 0.00064713 |
| immunoglobulin heavy chain (alpha polypeptide) (mapped)                                          | Igha_mapped     | -1.825167553 | -1.825167553 | 1.42E-05   |
| lysosomal-associated protein transmembrane 5                                                     | Laptm5          | -1.819907588 | -1.819907588 | 5.20E-05   |
| prostaglandin D2 synthase 2                                                                      | Ptgds2          | -1.819636842 | -1.819636842 | 0.0001695  |
| purinergic receptor P2Y, G-protein coupled, 13                                                   | P2ry13          | -1.814963983 | -1.814963983 | 0.00945179 |
| thyroid hormone responsive protein                                                               | Thrsp           | -1.812541071 | -1.812541071 | 2.48E-06   |
| lymphocyte cytosolic protein 1                                                                   | Lcp1            | -1.810177845 | -1.810177845 | 1.87E-05   |
| thyroid hormone responsive protein                                                               | Thrsp           | -1.808928133 | -1.808928133 | 4.59E-07   |
| ribonuclease, RNase A family 4                                                                   | Rnase4          | -1.80722447  | -1.80722447  | 1.15E-06   |
| unknown gene                                                                                     | NA              | -1.795279494 | -1.795279494 | 4.74E-08   |
| kallikrein B, plasma 1                                                                           | Klkb1           | -1.791327825 | -1.791327825 | 1.32E-08   |
| adenosine A3 receptor                                                                            | Adora3          | -1.775153303 | -1.775153303 | 0.00308773 |
| unknown gene                                                                                     | NA              | -1.76608819  | -1.76608819  | 2.47E-07   |
| fibrinogen-like 2                                                                                | Fgl2            | -1.764736849 | -1.764736849 | 0.00092434 |
| cytochrome P450, subfamily 2A, polypeptide 1                                                     | Cyp2a2          | -1.75932215  | -1.75932215  | 2.81E-06   |
| cysteine-rich protein 2                                                                          | Crip2           | -1.748655938 | -1.748655938 | 6.58E-06   |
| budding uninhibited by benzimidazoles 1 homolog (S. cerevisiae) (predicted)                      | Bub1_predicted  | -1.742505471 | -1.742505471 | 0.00014017 |

Bcl2 modifying factor  
 chemokine (C-C motif) ligand 6  
 solute carrier family 17 (sodium phosphate), member 2 (predicted)  
 similar to myo-inositol 1-phosphate synthase A1  
 unknown gene  
 unknown gene  
 3-hydroxybutyrate dehydrogenase, type 1  
 cell division cycle associated 3  
 coactosin-like 1 (Dictyostelium) (predicted)  
 similar to cta-2-beta protein (141 AA) (predicted)  
 major histocompatibility complex, class II, DM beta  
 unknown gene  
 unknown gene  
 solute carrier organic anion transporter family, member 1a4  
 unknown gene  
 unknown gene  
 similar to epithelial stromal interaction 1 isoform a (predicted)  
 Rho, GDP dissociation inhibitor (GDI) beta  
 unknown gene  
 osteoglycin (predicted)  
 Rac GTPase-activating protein 1 (predicted)  
 ring finger protein 125 (predicted)  
 cyclin G2 (predicted)  
 guanylate nucleotide binding protein 4 (predicted)  
 hyaluronan mediated motility receptor (RHAMM)  
 granzyme A  
 unknown gene  
 unknown gene  
 chemokine (C-X-C motif) ligand 9  
 unknown gene  
 protocadherin alpha 4  
 kinesin family member 20A (predicted)  
 kelch-like 24 (Drosophila)  
 similar to scavenger receptor type A SR-A (predicted)  
 pyruvate kinase, liver and red blood cell  
 similar to phospholipase D family, member 4  
 similar to RIKEN cDNA D130038B21  
 osteoglycin (predicted)  
 coronin, actin binding protein 1A  
 solute carrier family 17 (sodium phosphate), member 3  
 sialic acid binding Ig-like lectin 5 (predicted)  
 epidermal growth factor receptor  
 cytoskeleton associated protein 2 (predicted)  
 similar to solute carrier family 17 (sodium phosphate), member 4  
 solute carrier family 22 (organic anion transporter), member 8  
 unknown gene  
 protein regulator of cytokinesis 1 (predicted)  
 chemokine (C-C motif) ligand 5  
 chaperone, ABC1 activity of bc1 complex like (S. pombe)  
 cytochrome P450, family 26, subfamily b, polypeptide 1  
 unknown gene  
 capping protein (actin filament), gelsolin-like  
 unknown gene  
 similar to ecotropic viral integration site 2A  
 lysophospholipase

|                      |              |              |            |
|----------------------|--------------|--------------|------------|
| Bmf                  | -1.74088613  | -1.74088613  | 3.66E-05   |
| Ccl6                 | -1.737653942 | -1.737653942 | 4.89E-05   |
| Slc17a2_predicted    | -1.73341429  | -1.73341429  | 1.44E-05   |
| LOC290651            | -1.724491957 | -1.724491957 | 0.00012483 |
| NA                   | -1.721190699 | -1.721190699 | 1.56E-05   |
| NA                   | -1.714651133 | -1.714651133 | 2.15E-06   |
| Bdh1                 | -1.708269991 | -1.708269991 | 1.36E-08   |
| Cdca3                | -1.707420406 | -1.707420406 | 0.0009046  |
| Cotl1_predicted      | -1.69964866  | -1.69964866  | 0.0007805  |
| RGD1565540_predicted | -1.697404162 | -1.697404162 | 1.77E-05   |
| Hla-dmb              | -1.695434151 | -1.695434151 | 9.11E-06   |
| NA                   | -1.69182317  | -1.69182317  | 0.00028229 |
| NA                   | -1.691140946 | -1.691140946 | 0.00024945 |
| Slco1a4              | -1.684838079 | -1.684838079 | 8.68E-06   |
| NA                   | -1.684272074 | -1.684272074 | 0.00057128 |
| NA                   | -1.681990839 | -1.681990839 | 0.00014292 |
| RGD1563207_predicted | -1.67805076  | -1.67805076  | 0.00123743 |
| Arhgdib              | -1.67788286  | -1.67788286  | 6.15E-05   |
| NA                   | -1.676943116 | -1.676943116 | 0.00019074 |
| Ogn_predicted        | -1.673210389 | -1.673210389 | 1.14E-05   |
| Racgap1_predicted    | -1.671391591 | -1.671391591 | 0.00035275 |
| Rnf125_predicted     | -1.667939683 | -1.667939683 | 2.51E-06   |
| Cng2_predicted       | -1.661123813 | -1.661123813 | 0.00014989 |
| Gbp4_predicted       | -1.658430694 | -1.658430694 | 0.00028995 |
| Hmmr                 | -1.658388758 | -1.658388758 | 1.32E-05   |
| Gzma                 | -1.653958603 | -1.653958603 | 0.00088589 |
| NA                   | -1.650549309 | -1.650549309 | 8.80E-05   |
| NA                   | -1.644946887 | -1.644946887 | 3.66E-05   |
| Cxcl9                | -1.639230014 | -1.639230014 | 2.57E-05   |
| NA                   | -1.635857745 | -1.635857745 | 1.61E-05   |
| Pcdha4               | -1.632876823 | -1.632876823 | 0.00015195 |
| Kif20a_predicted     | -1.626504203 | -1.626504203 | 2.60E-06   |
| Klhl24               | -1.625302014 | -1.625302014 | 0.00036449 |
| RGD1564316_predicted | -1.615075197 | -1.615075197 | 8.77E-05   |
| Pklr                 | -1.61425115  | -1.61425115  | 3.68E-06   |
| LOC362792            | -1.614034975 | -1.614034975 | 0.00204089 |
| RGD1305890           | -1.61378298  | -1.61378298  | 4.61E-08   |
| Ogn_predicted        | -1.613353578 | -1.613353578 | 0.00039852 |
| Coro1a               | -1.61204536  | -1.61204536  | 4.20E-05   |
| Slc17a3              | -1.608057831 | -1.608057831 | 1.19E-05   |
| Siglec5_predicted    | -1.607092477 | -1.607092477 | 0.00073899 |
| Egfr                 | -1.605275073 | -1.605275073 | 2.19E-07   |
| Ckap2_predicted      | -1.605026232 | -1.605026232 | 0.0005001  |
| LOC679784            | -1.601477244 | -1.601477244 | 4.56E-06   |
| Slc22a8              | -1.600696543 | -1.600696543 | 9.51E-06   |
| NA                   | -1.599609572 | -1.599609572 | 0.00039209 |
| Prc1_predicted       | -1.596668718 | -1.596668718 | 0.00041528 |
| Ccl5                 | -1.593502894 | -1.593502894 | 0.0001642  |
| Cabc1                | -1.593062572 | -1.593062572 | 7.03E-06   |
| Cyp26b1              | -1.588788616 | -1.588788616 | 2.23E-06   |
| NA                   | -1.588461365 | -1.588461365 | 0.00082949 |
| Capg                 | -1.588040332 | -1.588040332 | 0.00098919 |
| NA                   | -1.58702288  | -1.58702288  | 1.51E-05   |
| LOC685433            | -1.584622274 | -1.584622274 | 0.00051258 |
| LOC246266            | -1.579572022 | -1.579572022 | 6.54E-05   |

|                                                                                                             |                      |              |              |            |
|-------------------------------------------------------------------------------------------------------------|----------------------|--------------|--------------|------------|
| heme oxygenase (decycling) 1                                                                                | Hmox1                | -1.576386514 | -1.576386514 | 2.28E-05   |
| alcohol dehydrogenase 4 (class II), pi polypeptide                                                          | Adh4                 | -1.572130593 | -1.572130593 | 0.00017892 |
| minichromosome maintenance deficient 6 (MIS5 homolog, S. pombe) (S. cerevisiae)                             | Mcm6                 | -1.572010337 | -1.572010337 | 0.00025824 |
| neurofibromatosis 1                                                                                         | Nf1                  | -1.570821095 | -1.570821095 | 0.00115488 |
| kelch-like 24 (Drosophila)                                                                                  | Klhl24               | -1.570472158 | -1.570472158 | 4.34E-06   |
| crystallin, mu                                                                                              | Crym                 | -1.569810051 | -1.569810051 | 1.16E-05   |
| similar to TPR repeat-containing protein KIAA1043                                                           | LOC304558            | -1.567918359 | -1.567918359 | 0.00198069 |
| unknown gene                                                                                                | NA                   | -1.564927112 | -1.564927112 | 0.0004536  |
| purinergic receptor P2Y, G-protein coupled, 13                                                              | P2ry13               | -1.563268856 | -1.563268856 | 0.00017578 |
| chemokine (C-X-C motif) ligand 9                                                                            | Cxcl9                | -1.561190143 | -1.561190143 | 1.56E-05   |
| leukocyte immunoglobulin-like receptor                                                                      | Lilrc1               | -1.554965552 | -1.554965552 | 0.00052082 |
| microtubule-associated protein 7 (predicted)                                                                | Mtap7_predicted      | -1.553770948 | -1.553770948 | 0.00101808 |
| malic enzyme 1                                                                                              | Me1                  | -1.542569467 | -1.542569467 | 1.29E-05   |
| unknown gene                                                                                                | NA                   | -1.528945141 | -1.528945141 | 0.00135042 |
| membrane-spanning 4-domains, subfamily A, member 11 (predicted)                                             | Ms4a11_predicted     | -1.527309314 | -1.527309314 | 0.00148327 |
| lysosomal-associated protein transmembrane 5                                                                | Laptm5               | -1.520070204 | -1.520070204 | 3.48E-06   |
| leukotriene C4 synthase                                                                                     | Ltc4s                | -1.517939641 | -1.517939641 | 0.00102684 |
| similar to Expressed sequence AW146242 (predicted)                                                          | RGD1306494_predicted | -1.517759946 | -1.517759946 | 0.00013225 |
| nuclear factor, erythroid derived 2                                                                         | Nfe2                 | -1.517349696 | -1.517349696 | 0.0031632  |
| serine (or cysteine) proteinase inhibitor, clade A (alpha-1 antiproteinase, antitrypsin), member 6 (mapped) | Serpina6             | -1.506775225 | -1.506775225 | 7.68E-08   |
| cysteine and glycine-rich protein 1                                                                         | Csrp1                | -1.505431461 | -1.505431461 | 3.46E-05   |
| similar to Ras-related protein Rap-1b precursor (GTP-binding protein smg p21B)                              | LOC363897            | -1.50402813  | -1.50402813  | 0.0001853  |
| aldehyde oxidase 1                                                                                          | Aox1                 | -1.50044917  | -1.50044917  | 1.84E-05   |
| sulfotransferase family, cytosolic, 1C, member 2                                                            | Sult1c2              | -1.49869779  | -1.49869779  | 1.47E-06   |
| Tyro protein tyrosine kinase binding protein                                                                | Tyrobp               | -1.49837435  | -1.49837435  | 7.40E-05   |
| secreted acidic cysteine rich glycoprotein                                                                  | Sparc                | -1.498017371 | -1.498017371 | 0.00019687 |
| unknown gene                                                                                                | NA                   | -1.495757361 | -1.495757361 | 0.00052795 |
| uropodin 1B                                                                                                 | Upk1b                | -1.493723989 | -1.493723989 | 0.00411615 |
| CD83 antigen (predicted)                                                                                    | Cd83_predicted       | -1.489501999 | -1.489501999 | 2.14E-06   |
| cell division cycle 20 homolog (S. cerevisiae)                                                              | Cdc20                | -1.489048111 | -1.489048111 | 0.00379146 |
| insulin-like growth factor binding protein, acid labile subunit                                             | Igfals               | -1.484201637 | -1.484201637 | 5.22E-05   |
| unknown gene                                                                                                | NA                   | -1.483999698 | -1.483999698 | 0.00117895 |
| actinin, alpha 1                                                                                            | Actn1                | -1.483595109 | -1.483595109 | 0.00022467 |
| fatty acid desaturase 2                                                                                     | Fads2                | -1.479937866 | -1.479937866 | 4.13E-07   |
| protein kinase C, delta binding protein                                                                     | Prkcdp               | -1.478745697 | -1.478745697 | 1.61E-05   |
| plasminogen activator, urokinase                                                                            | Plau                 | -1.476830921 | -1.476830921 | 0.00150286 |
| similar to N-acetylneuraminidase pyruvate lyase                                                             | LOC304860            | -1.476280155 | -1.476280155 | 0.00061225 |
| cytochrome P450, family 1, subfamily a, polypeptide 2                                                       | Cyp1a2               | -1.475689905 | -1.475689905 | 7.13E-06   |
| unknown gene                                                                                                | NA                   | -1.47265043  | -1.47265043  | 0.00047591 |
| hairy and enhancer of split 6 (Drosophila)                                                                  | Hes6                 | -1.465479478 | -1.465479478 | 5.11E-05   |
| ubiquitin-conjugating enzyme E2C (predicted)                                                                | Ube2c_predicted      | -1.464537643 | -1.464537643 | 0.00013189 |
| similar to interferon-inducible GTPase                                                                      | RGD1309362           | -1.464269458 | -1.464269458 | 2.01E-06   |
| unknown gene                                                                                                | NA                   | -1.462461385 | -1.462461385 | 0.00368713 |
| unknown gene                                                                                                | NA                   | -1.462272339 | -1.462272339 | 0.00032552 |
| unknown gene                                                                                                | NA                   | -1.449735832 | -1.449735832 | 8.86E-05   |
| RT1 class Ib, locus Aw2                                                                                     | RT1-Aw2              | -1.446302586 | -1.446302586 | 2.40E-05   |
| cytochrome b-245, beta polypeptide                                                                          | Cybb                 | -1.44542433  | -1.44542433  | 0.00055956 |
| PDZ and LIM domain 1 (elfin)                                                                                | Pdlim1               | -1.44280955  | -1.44280955  | 3.41E-08   |
| similar to immunoglobulin superfamily containing leucine-rich repeat                                        | LOC686539            | -1.442664039 | -1.442664039 | 0.00026813 |
| cd36 antigen                                                                                                | Cd36                 | -1.442512439 | -1.442512439 | 3.52E-06   |
| interferon regulatory factor 8                                                                              | Irf8                 | -1.441990671 | -1.441990671 | 1.69E-05   |
| transmembrane 4 superfamily member 13                                                                       | Tm4sf13              | -1.441634621 | -1.441634621 | 0.00039136 |
| AA926063 gene                                                                                               | AA926063             | -1.438326923 | -1.438326923 | 0.00379127 |
| claudin 10 (predicted)                                                                                      | Cldn10_predicted     | -1.435062227 | -1.435062227 | 0.0010791  |
| src-like adaptor                                                                                            | Sla                  | -1.432378762 | -1.432378762 | 0.00274691 |

|                                                                                                                              |                      |              |              |            |
|------------------------------------------------------------------------------------------------------------------------------|----------------------|--------------|--------------|------------|
| lectin, galactose binding, soluble 3                                                                                         | Lgals3               | -1.432075699 | -1.432075699 | 4.97E-07   |
| unknown gene                                                                                                                 | NA                   | -1.423700669 | -1.423700669 | 8.54E-05   |
| napsin A aspartic peptidase                                                                                                  | Napsa                | -1.422609667 | -1.422609667 | 0.00127185 |
| glycoprotein, synaptic 2                                                                                                     | Gpsn2                | -1.421980806 | -1.421980806 | 4.40E-06   |
| stathmin 1                                                                                                                   | Stmn1                | -1.417752448 | -1.417752448 | 1.84E-06   |
| CD38 antigen                                                                                                                 | Cd38                 | -1.413226058 | -1.413226058 | 0.00132212 |
| phosphoenolpyruvate carboxykinase                                                                                            | Pepck                | -1.410387708 | -1.410387708 | 0.00034999 |
| carboxylesterase 1                                                                                                           | Ces1                 | -1.40821785  | -1.40821785  | 7.91E-05   |
| similar to solute carrier family 25 (mitochondrial carrier; phosphate carrier), member 23                                    | LOC301113            | -1.405607185 | -1.405607185 | 0.00013514 |
| adaptor-related protein complex 1, sigma 2 subunit (predicted)                                                               | Ap1s2_predicted      | -1.40210209  | -1.40210209  | 1.27E-05   |
| cd36 antigen                                                                                                                 | Cd36                 | -1.400083192 | -1.400083192 | 0.00066939 |
| MARVEL (membrane-associating) domain containing 1                                                                            | Mrvldc1              | -1.399420549 | -1.399420549 | 6.48E-05   |
| folate receptor 2 (fetal) (predicted)                                                                                        | Folr2_predicted      | -1.399386308 | -1.399386308 | 5.59E-05   |
| interleukin 18 binding protein                                                                                               | Il18bp               | -1.398555639 | -1.398555639 | 5.22E-05   |
| potassium channel tetramerisation domain containing 12 (predicted)                                                           | Kctd12_predicted     | -1.397816915 | -1.397816915 | 5.71E-06   |
| fatty acid synthase                                                                                                          | Fasn                 | -1.392417111 | -1.392417111 | 4.25E-05   |
| lipocalin 2                                                                                                                  | Lcn2                 | -1.390129382 | -1.390129382 | 4.68E-05   |
| similar to Shc SH2-domain binding protein 1                                                                                  | LOC687121            | -1.388756278 | -1.388756278 | 0.00020429 |
| mesoderm specific transcript                                                                                                 | Mest                 | -1.383276097 | -1.383276097 | 0.00064875 |
| RT1 class II, locus Bb                                                                                                       | RT1-Bb               | -1.379413204 | -1.379413204 | 9.33E-05   |
| cystathionase (cystathionine gamma-lyase)                                                                                    | Cth                  | -1.37927116  | -1.37927116  | 1.46E-07   |
| unc-93 homolog B1 (C. elegans)                                                                                               | Unc93b1              | -1.374159805 | -1.374159805 | 0.00010156 |
| carbonic anhydrase 3                                                                                                         | Ca3                  | -1.37031102  | -1.37031102  | 5.39E-06   |
| sequestosome 1                                                                                                               | Sqstm1               | -1.367208865 | -1.367208865 | 1.41E-05   |
| sequestosome 1                                                                                                               | Sqstm1               | -1.366595169 | -1.366595169 | 2.16E-06   |
| ephrin A1                                                                                                                    | Efn1                 | -1.363543982 | -1.363543982 | 2.02E-06   |
| solute carrier family 6 (neurotransmitter transporter, glycine), member 9                                                    | Slc6a9               | -1.362835092 | -1.362835092 | 7.23E-06   |
| Ena-vasodilator stimulated phosphoprotein                                                                                    | Evl                  | -1.362812762 | -1.362812762 | 7.68E-05   |
| acid phosphatase 5, tartrate resistant                                                                                       | Acp5                 | -1.361915561 | -1.361915561 | 0.00027455 |
| hydroxyacid oxidase 2 (long chain)                                                                                           | Hao2                 | -1.35994066  | -1.35994066  | 1.06E-07   |
| syncollin                                                                                                                    | Syncn                | -1.357373545 | -1.357373545 | 0.00089369 |
| solute carrier family 15, member 3                                                                                           | Slc15a3              | -1.356916399 | -1.356916399 | 0.00052136 |
| procollagen, type XIV, alpha 1 (predicted)                                                                                   | Col14a1_predicted    | -1.354658351 | -1.354658351 | 9.15E-06   |
| hypothetical LOC310540                                                                                                       | MGC72614             | -1.350495011 | -1.350495011 | 0.00013091 |
| unknown gene                                                                                                                 | NA                   | -1.350221476 | -1.350221476 | 0.00403881 |
| cd86 antigen                                                                                                                 | Cd86                 | -1.348393783 | -1.348393783 | 1.04E-05   |
| hemopoietic cell kinase                                                                                                      | Hck                  | -1.348393058 | -1.348393058 | 4.38E-05   |
| unknown gene                                                                                                                 | NA                   | -1.346856171 | -1.346856171 | 0.00464169 |
| arrestin, beta 2                                                                                                             | Arrb2                | -1.344840083 | -1.344840083 | 9.21E-06   |
| similar to DNA segment, Chr 11, ERATO Doi 18, expressed                                                                      | RGD1309472           | -1.340529165 | -1.340529165 | 0.00015965 |
| similar to Dedicator of cytokinesis protein 10 (Protein zizimin 3) (predicted)                                               | RGD1561963_predicted | -1.340396115 | -1.340396115 | 0.00414325 |
| interferon regulatory factor 1                                                                                               | Irf1                 | -1.339938774 | -1.339938774 | 4.53E-05   |
| mesenchyme homeobox 2                                                                                                        | Meox2                | -1.339820893 | -1.339820893 | 0.0001202  |
| calcium/calmodulin-dependent protein kinase II, delta                                                                        | Camk2d               | -1.3381198   | -1.3381198   | 0.00072698 |
| calcium binding and coiled coil domain 1                                                                                     | Calcoo1              | -1.336923576 | -1.336923576 | 0.00060339 |
| acyl-Coenzyme A oxidase 3, pristanoyl                                                                                        | Acox3                | -1.33386777  | -1.33386777  | 1.60E-05   |
| pleckstrin                                                                                                                   | Plek                 | -1.328324281 | -1.328324281 | 0.00082805 |
| plasmalemma vesicle associated protein                                                                                       | Plvap                | -1.326616368 | -1.326616368 | 3.57E-05   |
| protein kinase C, beta 1                                                                                                     | Prkcb1               | -1.320850188 | -1.320850188 | 1.30E-05   |
| enoyl-Coenzyme A, hydratase/3-hydroxyacyl Coenzyme A dehydrogenase                                                           | Ehhadh               | -1.320492884 | -1.320492884 | 0.00033751 |
| unknown gene                                                                                                                 | NA                   | -1.319407451 | -1.319407451 | 1.08E-05   |
| nucleolar and spindle associated protein 1 (predicted)                                                                       | Nusap1_predicted     | -1.316657462 | -1.316657462 | 0.00016535 |
| solute carrier family 35, member D2 (predicted)                                                                              | Slc35d2_predicted    | -1.315560317 | -1.315560317 | 0.0001287  |
| SWI/SNF-related, matrix-associated actin-dependent regulator of chromatin, subfamily a, containing DEAD/H box 1' (predicted) | Smarcd1_predicted    | -1.314333148 | -1.314333148 | 0.00015819 |
| solute carrier family 6 (neurotransmitter transporter, taurine), member 6                                                    | Slc6a6               | -1.313830039 | -1.313830039 | 0.00080181 |

growth hormone receptor  
 acyl-CoA synthetase short-chain family member 2 (predicted)  
 EH-domain containing 3  
 similar to AVIEF  
 ephrin A1  
 procollagen, type 1, alpha 1  
 solute carrier family 19 (thiamine transporter), member 2  
 antigen identified by monoclonal antibody MRC OX-2 receptor  
 similar to RIKEN cDNA 5830404H04  
 mannan-binding lectin serine peptidase 1  
 unknown gene  
 flavin containing monooxygenase 5  
 unknown gene  
 leucine rich repeat containing 33  
 protein tyrosine phosphatase, non-receptor type 18  
 interferon induced transmembrane protein 1 (predicted)  
 lanC (bacterial lantibiotic synthetase component C)-like 1  
 amyloid beta (A4) precursor protein  
 stearyl-Coenzyme A desaturase 2  
 unknown gene  
 kininogen 1  
 similar to Glutathione S-transferase, theta 3 (predicted)  
 unknown gene  
 NA  
 zinc finger protein 367  
 tRNA phosphotransferase 1 (predicted)  
 unknown gene  
 pyruvate dehydrogenase kinase, isoenzyme 4  
 similar to Aa2-174  
 unknown gene  
 ankyrin repeat and BTB (POZ) domain containing 1  
 aldo-keto reductase family 1, member B4 (aldose reductase)  
 tweety homolog 3 (Drosophila) (predicted)  
 immunoglobulin superfamily, member 10  
 unknown gene  
 embigin  
 CD5 antigen-like  
 similar to antigen identified by monoclonal antibody MRC OX-2 receptor (predicted)  
 unknown gene  
 cell division cycle 20 homolog (S. cerevisiae)  
 SH3 domain binding glutamic acid-rich protein-like 3 (predicted)  
 RAB11B, member RAS oncogene family  
 transmembrane 6 superfamily member 1 (predicted)  
 Iroquois related homeobox 1 (Drosophila) (predicted)  
 aminolevulinic acid synthase 2  
 pyruvate kinase, liver and red blood cell  
 unknown gene  
 superoxide dismutase 3, extracellular  
 lymphocyte cytosolic protein 2  
 osteoglycin (predicted)  
 unknown gene  
 IQ motif containing GTPase activating protein 1 (predicted)  
 RAS-related C3 botulinum substrate 2  
 caspase 1  
 osteoglycin (predicted)

|                      |              |              |            |
|----------------------|--------------|--------------|------------|
| Ghr                  | -1.312981229 | -1.312981229 | 0.00035501 |
| Accs2_predicted      | -1.3094304   | -1.3094304   | 6.52E-06   |
| Ehd3                 | -1.305946929 | -1.305946929 | 0.00021282 |
| LOC365948            | -1.305698905 | -1.305698905 | 0.00154161 |
| Efnal                | -1.305265109 | -1.305265109 | 0.000155   |
| Coll1a1              | -1.305156986 | -1.305156986 | 8.94E-05   |
| Slc19a2              | -1.305118445 | -1.305118445 | 1.09E-06   |
| Mox2r                | -1.301382839 | -1.301382839 | 0.0004592  |
| RGD735112            | -1.2986855   | -1.2986855   | 0.00010154 |
| Masp1                | -1.298538113 | -1.298538113 | 3.85E-07   |
| NA                   | -1.297425629 | -1.297425629 | 6.37E-05   |
| Fmo5                 | -1.292677943 | -1.292677943 | 4.19E-06   |
| NA                   | -1.291025044 | -1.291025044 | 8.58E-06   |
| Lrrc33               | -1.289486616 | -1.289486616 | 2.75E-05   |
| Ptpn18               | -1.287465801 | -1.287465801 | 1.83E-06   |
| Ifitm1_predicted     | -1.279018988 | -1.279018988 | 1.63E-06   |
| Lancl1               | -1.277981364 | -1.277981364 | 0.00015789 |
| App                  | -1.274823101 | -1.274823101 | 0.00018788 |
| Scd2                 | -1.268800574 | -1.268800574 | 0.00017384 |
| NA                   | -1.268111199 | -1.268111199 | 2.58E-05   |
| Kng1                 | -1.267794089 | -1.267794089 | 0.00021409 |
| RGD1562732_predicted | -1.266902051 | -1.266902051 | 7.21E-06   |
| Bckdhh               | -1.266859835 | -1.266859835 | 2.72E-05   |
| NA                   | -1.264065863 | -1.264065863 | 6.98E-07   |
| Zfp367               | -1.259957798 | -1.259957798 | 0.00261545 |
| Trpt1_predicted      | -1.256147149 | -1.256147149 | 0.00019255 |
| NA                   | -1.255064156 | -1.255064156 | 0.00076864 |
| Pdk4                 | -1.254493967 | -1.254493967 | 5.47E-05   |
| RGD1309578           | -1.251137109 | -1.251137109 | 5.14E-05   |
| NA                   | -1.245442819 | -1.245442819 | 1.06E-05   |
| Abtb1                | -1.245076039 | -1.245076039 | 1.38E-05   |
| Akr1b4               | -1.241639354 | -1.241639354 | 0.00010882 |
| Tyh3_predicted       | -1.239996495 | -1.239996495 | 0.00015795 |
| Igsf10               | -1.238578251 | -1.238578251 | 5.31E-06   |
| NA                   | -1.238036938 | -1.238036938 | 0.00023571 |
| Emb                  | -1.236901328 | -1.236901328 | 0.0001001  |
| Cd51                 | -1.236603003 | -1.236603003 | 0.00270603 |
| RGD1563387_predicted | -1.236369714 | -1.236369714 | 7.85E-06   |
| NA                   | -1.236150462 | -1.236150462 | 0.00024072 |
| Cdc20                | -1.235946107 | -1.235946107 | 0.0005458  |
| Sh3bgrl3_predicted   | -1.235518739 | -1.235518739 | 4.99E-06   |
| Rab11b               | -1.235195804 | -1.235195804 | 0.00012546 |
| Tm6sf1_predicted     | -1.23516664  | -1.23516664  | 0.00040827 |
| Irx1_predicted       | -1.233888517 | -1.233888517 | 0.00074212 |
| Alas2                | -1.230766587 | -1.230766587 | 0.00013057 |
| Pklr                 | -1.227463717 | -1.227463717 | 0.00067008 |
| NA                   | -1.226542795 | -1.226542795 | 0.00562609 |
| Sod3                 | -1.224143433 | -1.224143433 | 1.56E-05   |
| Lcp2                 | -1.223739602 | -1.223739602 | 0.00233935 |
| Ogn_predicted        | -1.222462404 | -1.222462404 | 4.00E-05   |
| NA                   | -1.218940967 | -1.218940967 | 6.53E-05   |
| Iqgap1_predicted     | -1.218136971 | -1.218136971 | 2.74E-06   |
| Rac2                 | -1.217401473 | -1.217401473 | 0.00026909 |
| Casp1                | -1.217236176 | -1.217236176 | 0.00018047 |
| Ogn_predicted        | -1.214605193 | -1.214605193 | 0.00405444 |

carbonic anhydrase 8  
 SH3-domain GRB2-like 3  
 unknown gene  
 deoxyribonuclease I-like 3  
 metallothionein 1a  
 similar to N-acetylglucosaminyltransferase IVb (predicted)  
 Cytochrome P450 IIA1 (hepatic steroid hydroxylase IIA1) gene  
 similar to hypothetical protein FLJ11127  
 unknown gene  
 unknown gene  
 amyloid beta (A4) precursor-like protein 2  
 UDP-N-acetyl-alpha-D-galactosamine:polypeptide N-acetylgalactosaminyltransferase 1  
 interleukin 13 receptor, alpha 1  
 zinc finger, FYVE domain containing 1 (predicted)  
 hematopoietic cell signal transducer  
 unknown gene  
 similar to gamma-aminobutyric acid (GABA(A)) receptor-associated protein-like 1  
 cadherin 11  
 proteasome (prosome, macropain) subunit, beta type 8  
 epoxide hydrolase 1, microsomal  
 Bruton agammaglobulinemia tyrosine kinase  
 parathyrosin  
 solute carrier family 13 (sodium-dependent dicarboxylate transporter), member 3  
 cytochrome P450, family 2, subfamily c, polypeptide 23  
 unknown gene  
 unknown gene  
 transcription factor 19  
 similar to CG4025-PA  
 GLI pathogenesis-related 1 (glioma)  
 calcitonin receptor-like  
 cytochrome b5 reductase 3  
 unknown gene  
 similar to solute carrier family 25 (mitochondrial carrier; phosphate carrier), member 23  
 N-myc downstream regulated gene 2  
 glucan (1,4-alpha-), branching enzyme 1  
 similar to Ig kappa chain (predicted)  
 unknown gene  
 disabled homolog 2 (Drosophila)  
 complement component 9  
 DDHD domain containing 1  
 t-complex 11 (mouse) like 2  
 complement component 6  
 mitogen-activated protein kinase 9  
 unknown gene  
 similar to chromosome 6 open reading frame 80; chemokine C-C motif receptor-like 1 adjacent  
 Cd200 antigen  
 unknown gene  
 procollagen, type XIV, alpha 1 (predicted)  
 guanine nucleotide binding protein, gamma 2  
 EH-domain containing 3  
 similar to MGC47262 protein  
 unknown gene  
 epidermal growth factor  
 Gardner-Rasheed feline sarcoma viral (Fgr) oncogene homolog  
 unknown gene

|                      |              |              |            |
|----------------------|--------------|--------------|------------|
| Car8                 | -1.214291258 | -1.214291258 | 9.52E-07   |
| Sh3gl3               | -1.2122152   | -1.2122152   | 2.35E-05   |
| NA                   | -1.210705791 | -1.210705791 | 6.63E-05   |
| Dnase1l3             | -1.207445226 | -1.207445226 | 1.14E-05   |
| Mt1a                 | -1.20650915  | -1.20650915  | 3.44E-05   |
| RGD1562836_predicted | -1.205922517 | -1.205922517 | 1.47E-05   |
| Cyp2a1               | -1.20358641  | -1.20358641  | 2.57E-05   |
| LOC310190            | -1.202542139 | -1.202542139 | 0.0006516  |
| NA                   | -1.199324606 | -1.199324606 | 2.54E-07   |
| NA                   | -1.19751573  | -1.19751573  | 0.00507635 |
| Aplp2                | -1.197187458 | -1.197187458 | 4.08E-05   |
| Galnt1               | -1.196754808 | -1.196754808 | 0.00124715 |
| Il13ra1              | -1.192543056 | -1.192543056 | 0.00051685 |
| Zfyve1_predicted     | -1.192358446 | -1.192358446 | 0.00112499 |
| Hcst                 | -1.189146704 | -1.189146704 | 0.00316447 |
| NA                   | -1.187807643 | -1.187807643 | 0.00172071 |
| MGC125167            | -1.185962595 | -1.185962595 | 0.00015143 |
| Cdh11                | -1.181868467 | -1.181868467 | 0.00261088 |
| Psmb8                | -1.181577077 | -1.181577077 | 1.81E-05   |
| Ephx1                | -1.181522905 | -1.181522905 | 2.02E-06   |
| Btk                  | -1.181104153 | -1.181104153 | 0.00011    |
| Ptms                 | -1.179739573 | -1.179739573 | 0.00035011 |
| Slc13a3              | -1.178702496 | -1.178702496 | 4.98E-05   |
| Cyp2c23              | -1.17600381  | -1.17600381  | 3.33E-06   |
| NA                   | -1.173287326 | -1.173287326 | 0.00079541 |
| NA                   | -1.169354357 | -1.169354357 | 0.00019474 |
| Tcf19                | -1.168108991 | -1.168108991 | 0.00069505 |
| LOC679937            | -1.16784417  | -1.16784417  | 0.00244631 |
| Glplr1               | -1.16761223  | -1.16761223  | 0.00026805 |
| Calcr1               | -1.167049944 | -1.167049944 | 0.00350928 |
| Cyb5r3               | -1.164259397 | -1.164259397 | 1.37E-05   |
| NA                   | -1.163405414 | -1.163405414 | 0.0005242  |
| LOC301113            | -1.162569042 | -1.162569042 | 0.00012892 |
| Ndrg2                | -1.1608748   | -1.1608748   | 9.52E-07   |
| Gbe1                 | -1.160617925 | -1.160617925 | 8.20E-08   |
| RGD1562855_predicted | -1.159911105 | -1.159911105 | 8.99E-05   |
| NA                   | -1.159596331 | -1.159596331 | 0.00065866 |
| Dab2                 | -1.159390187 | -1.159390187 | 0.00011175 |
| C9                   | -1.158276505 | -1.158276505 | 5.22E-07   |
| Ddhd1                | -1.157719393 | -1.157719393 | 0.00023882 |
| Tep1l12              | -1.156039743 | -1.156039743 | 3.94E-06   |
| C6                   | -1.155371625 | -1.155371625 | 2.06E-05   |
| Mapk9                | -1.152631996 | -1.152631996 | 6.45E-05   |
| NA                   | -1.152392747 | -1.152392747 | 6.99E-05   |
| RGD1310326           | -1.151843693 | -1.151843693 | 7.15E-05   |
| Cd200                | -1.151532979 | -1.151532979 | 0.00195408 |
| NA                   | -1.150469902 | -1.150469902 | 6.21E-05   |
| Col14a1_predicted    | -1.149983587 | -1.149983587 | 0.0001544  |
| Gng2                 | -1.149912375 | -1.149912375 | 0.00012929 |
| Ehd3                 | -1.149302369 | -1.149302369 | 6.58E-05   |
| RGD1561028           | -1.148388739 | -1.148388739 | 0.00016748 |
| NA                   | -1.147579108 | -1.147579108 | 1.16E-05   |
| Egf                  | -1.147360305 | -1.147360305 | 0.0001627  |
| Fgr                  | -1.146362716 | -1.146362716 | 1.02E-05   |
| NA                   | -1.146263926 | -1.146263926 | 0.0004311  |



|                                                                             |                      |              |              |            |
|-----------------------------------------------------------------------------|----------------------|--------------|--------------|------------|
| motile sperm domain containing 3                                            | Mospd3               | -1.143510982 | -1.143510982 | 0.00011684 |
| formyltetrahydrofolate dehydrogenase                                        | Fthfd                | -1.143445005 | -1.143445005 | 2.98E-07   |
| fractured callus expressed transcript 1                                     | Fxc1                 | 1.126108782  | 1.126108782  | 0.00047332 |
| unknown gene                                                                | NA                   | 1.126122173  | 1.126122173  | 2.40E-05   |
| myosin Ib                                                                   | Myo1b                | 1.126608604  | 1.126608604  | 2.19E-06   |
| DEAD (Asp-Glu-Ala-Asp) box polypeptide 39                                   | Ddx39                | 1.13039178   | 1.13039178   | 8.23E-06   |
| choline phosphotransferase 1                                                | Chpt1                | 1.131011443  | 1.131011443  | 5.13E-06   |
| nucleosome assembly protein 1-like 1                                        | Nap111               | 1.132197995  | 1.132197995  | 0.00018986 |
| unknown gene                                                                | NA                   | 1.132200623  | 1.132200623  | 0.00012986 |
| similar to RIKEN cDNA 0610008C08 (predicted)                                | RGD1565289_predicted | 1.134637781  | 1.134637781  | 3.23E-05   |
| mitochondrial acyl-CoA thioesterase 1                                       | Mte1                 | 1.136834341  | 1.136834341  | 1.36E-06   |
| matrix Gla protein                                                          | Mgp                  | 1.137485981  | 1.137485981  | 3.38E-07   |
| unknown gene                                                                | NA                   | 1.138007646  | 1.138007646  | 0.01127426 |
| arachidonate 5-lipoxygenase                                                 | Alox5                | 1.138212594  | 1.138212594  | 1.33E-05   |
| transmembrane protein 33                                                    | Tmem33               | 1.138482096  | 1.138482096  | 2.22E-06   |
| similar to outer dense fiber of sperm tails 2-like                          | LOC685425            | 1.138526995  | 1.138526995  | 0.00093276 |
| similar to hypothetical protein D4Ert89e                                    | RGD1305703           | 1.148188312  | 1.148188312  | 1.55E-05   |
| kelch-like 2, Mayven (Drosophila) (predicted)                               | Klhl2_predicted      | 1.148197944  | 1.148197944  | 3.34E-05   |
| unknown gene                                                                | NA                   | 1.152971519  | 1.152971519  | 0.00042544 |
| recombination activating gene 1 activating protein 1 (predicted)            | Rag1ap1_predicted    | 1.154613971  | 1.154613971  | 0.00035366 |
| SEC23B (S. cerevisiae) (predicted)                                          | Sec23b_predicted     | 1.155722364  | 1.155722364  | 2.56E-05   |
| NADH dehydrogenase (ubiquinone) 1 alpha subcomplex, 7 (B14.5a) (predicted)  | Ndufa7_predicted     | 1.156944163  | 1.156944163  | 0.00057261 |
| sperm associated antigen 9 (predicted)                                      | Spag9_predicted      | 1.157573349  | 1.157573349  | 9.53E-05   |
| similar to mitochondrial carrier family protein                             | RGD1308774           | 1.15766719   | 1.15766719   | 0.01838514 |
| MTERF domain containing 1                                                   | Mterfd1              | 1.159389355  | 1.159389355  | 4.19E-05   |
| similar to RIKEN cDNA G430041M01 (predicted)                                | RGD1562563_predicted | 1.161521822  | 1.161521822  | 0.00084615 |
| zinc finger protein 386 (Kruppel-like)                                      | Znf386               | 1.162070568  | 1.162070568  | 0.00015728 |
| similar to NOGO-interacting mitochondrial protein (predicted)               | RGD1563384_predicted | 1.163542407  | 1.163542407  | 2.26E-05   |
| mitochondrial ribosomal protein L49                                         | Mrpl49               | 1.165587877  | 1.165587877  | 2.09E-05   |
| similar to BolA domain-containing protein like (11.4 kD) (1P25) (predicted) | RGD1305975_predicted | 1.166229616  | 1.166229616  | 0.00019114 |
| similar to Neural Wiskott-Aldrich syndrome protein (N-WASP)                 | LOC682507            | 1.166917824  | 1.166917824  | 1.60E-06   |
| translocase of inner mitochondrial membrane 8 homolog b (yeast)             | Timm8b               | 1.167048585  | 1.167048585  | 5.51E-06   |
| protein tyrosine phosphatase, receptor type, R                              | Ptpr                 | 1.167447958  | 1.167447958  | 0.00096045 |
| protein kinase, cAMP-dependent, regulatory, type 2, alpha                   | Prkar2a              | 1.168768015  | 1.168768015  | 4.78E-05   |
| similar to WD repeat domain 36                                              | LOC688637            | 1.169384619  | 1.169384619  | 0.0002161  |
| sterol carrier protein 2                                                    | Sep2                 | 1.171339709  | 1.171339709  | 0.00200128 |
| unknown gene                                                                | NA                   | 1.172836166  | 1.172836166  | 4.12E-05   |
| Jun oncogene                                                                | Jun                  | 1.17332214   | 1.17332214   | 7.92E-05   |
| cytosolic acyl-CoA thioesterase 1                                           | Cte1                 | 1.17351306   | 1.17351306   | 4.00E-05   |
| phytanoyl-CoA hydroxylase                                                   | Phyh                 | 1.17395867   | 1.17395867   | 1.70E-09   |
| similar to AMME syndrome candidate gene 1 protein homolog (predicted)       | RGD1561004_predicted | 1.175192956  | 1.175192956  | 0.00102779 |
| MHC class II region expressed gene KE2                                      | Ke2                  | 1.176202824  | 1.176202824  | 5.42E-05   |
| glycerol-3-phosphate dehydrogenase 1 (soluble)                              | Gpd1                 | 1.177251027  | 1.177251027  | 0.00047967 |
| TSC22 domain family 3                                                       | Tsc22d3              | 1.178529255  | 1.178529255  | 1.35E-05   |
| interferon-induced protein 44                                               | Ifi44                | 1.181085071  | 1.181085071  | 2.30E-05   |
| dolichol-phosphate (beta-D) mannosyltransferase 1 (predicted)               | Dpm1_predicted       | 1.182579497  | 1.182579497  | 0.00350833 |
| unknown gene                                                                | NA                   | 1.18484943   | 1.18484943   | 1.85E-05   |
| potential ubiquitin ligase                                                  | Herc6                | 1.191172866  | 1.191172866  | 0.00305227 |
| unknown gene                                                                | NA                   | 1.192441317  | 1.192441317  | 7.64E-05   |
| elastin microfibril interfacier 2 (predicted)                               | Emilin2_predicted    | 1.192728786  | 1.192728786  | 0.00012676 |
| NudC domain containing 1 (predicted)                                        | Nudcd1_predicted     | 1.196280872  | 1.196280872  | 0.0006771  |
| basic helix-loop-helix domain containing, class B, 8                        | Bhlhb8               | 1.196589894  | 1.196589894  | 0.00018672 |
| unknown gene                                                                | NA                   | 1.198379011  | 1.198379011  | 0.00037608 |
| similar to MAPK-interacting and spindle-stabilizing protein (predicted)     | RGD1311455_predicted | 1.200874257  | 1.200874257  | 1.72E-05   |
| zinc finger and BTB domain containing 16                                    | Zbtb16               | 1.202180731  | 1.202180731  | 0.00339535 |

|                                                                                                |                      |             |             |            |
|------------------------------------------------------------------------------------------------|----------------------|-------------|-------------|------------|
| mitochondrial ribosomal protein L47                                                            | Mrpl47               | 1.204936698 | 1.204936698 | 9.75E-06   |
| cerebellar degeneration-related 2                                                              | Cdr2                 | 1.207086252 | 1.207086252 | 0.00022152 |
| hypothetical protein LOC680080                                                                 | LOC680080            | 1.207473241 | 1.207473241 | 4.85E-06   |
| RGD1566320 (predicted)                                                                         | RGD1566320_predicted | 1.208620194 | 1.208620194 | 9.47E-06   |
| cytochrome b5 type B                                                                           | Cyb5b                | 1.209695641 | 1.209695641 | 7.14E-07   |
| dead end homolog 1 (zebrafish)                                                                 | Dnd1                 | 1.21083416  | 1.21083416  | 0.00089494 |
| similar to RIKEN cDNA 1110067D22 (predicted)                                                   | RGD1307414_predicted | 1.211036022 | 1.211036022 | 5.59E-06   |
| S100 calcium binding protein A10 (calpactin)                                                   | S100a10              | 1.211738972 | 1.211738972 | 4.98E-07   |
| hypothetical LOC305552 (predicted)                                                             | RGD1309501_predicted | 1.212133268 | 1.212133268 | 0.00230732 |
| similar to neuregulin 4                                                                        | LOC686216            | 1.212515419 | 1.212515419 | 0.00088516 |
| unknown gene                                                                                   | NA                   | 1.214770826 | 1.214770826 | 8.08E-06   |
| solute carrier family 25 (mitochondrial carrier, glutamate), member 22                         | Slc25a22             | 1.215256931 | 1.215256931 | 1.18E-05   |
| translocase of inner mitochondrial membrane 8 homolog a (yeast)                                | Timm8a               | 1.215347872 | 1.215347872 | 4.04E-05   |
| unknown gene                                                                                   | NA                   | 1.216256949 | 1.216256949 | 0.00351572 |
| unknown gene                                                                                   | NA                   | 1.217348118 | 1.217348118 | 0.00067132 |
| lipoprotein lipase                                                                             | Lpl                  | 1.221827369 | 1.221827369 | 7.06E-05   |
| cytochrome P450, 4a12                                                                          | Cyp4a12              | 1.221837414 | 1.221837414 | 2.47E-05   |
| heat shock 70kD protein 1A                                                                     | Hspa1a               | 1.222281785 | 1.222281785 | 8.38E-07   |
| sal-like 1 (Drosophila) (predicted)                                                            | Sall1_predicted      | 1.222558209 | 1.222558209 | 4.66E-05   |
| putative 28 kDa protein                                                                        | LOC289809            | 1.222928699 | 1.222928699 | 0.00011581 |
| similar to PAK/PLC-interacting protein 1                                                       | MGC125015            | 1.225380645 | 1.225380645 | 0.00018718 |
| glutamic pyruvate transaminase (alanine aminotransferase) 2 (predicted)                        | Gpt2_predicted       | 1.22713669  | 1.22713669  | 7.60E-06   |
| nuclear ubiquitous casein kinase and cyclin-dependent kinase substrate                         | Nucks                | 1.228109578 | 1.228109578 | 0.00013804 |
| similar to low density lipoprotein receptor-related protein binding protein (predicted)        | RGD1565715_predicted | 1.229611327 | 1.229611327 | 2.71E-05   |
| ubiquitin-conjugating enzyme E2E 2 (UBC4/5 homolog, yeast)                                     | Ubc2e2               | 1.230333838 | 1.230333838 | 2.08E-05   |
| ornithine decarboxylase 1                                                                      | Odc1                 | 1.230453994 | 1.230453994 | 8.00E-06   |
| cysteine rich protein 61                                                                       | Cyr61                | 1.230575443 | 1.230575443 | 0.00133165 |
| unknown gene                                                                                   | NA                   | 1.230946482 | 1.230946482 | 1.96E-05   |
| unknown gene                                                                                   | NA                   | 1.233121226 | 1.233121226 | 8.24E-07   |
| chaperonin subunit 8 (theta) (predicted)                                                       | Cct8_predicted       | 1.233648902 | 1.233648902 | 0.0001823  |
| unknown gene                                                                                   | NA                   | 1.234149491 | 1.234149491 | 0.00245826 |
| similar to RIKEN cDNA 2610002M06 (predicted)                                                   | RGD1566265_predicted | 1.235589128 | 1.235589128 | 0.00011039 |
| unknown gene                                                                                   | NA                   | 1.236160992 | 1.236160992 | 8.91E-06   |
| protein kinase, cAMP-dependent, regulatory, type 2, alpha                                      | Prkar2a              | 1.236839325 | 1.236839325 | 0.00017855 |
| 3-hydroxy-3-methylglutaryl-Coenzyme A reductase                                                | Hmgcr                | 1.239526277 | 1.239526277 | 1.62E-05   |
| similar to Eph receptor A4 (predicted)                                                         | RGD1560587_predicted | 1.239897533 | 1.239897533 | 0.0002644  |
| kinesin family member 21A (predicted)                                                          | Kif21a_predicted     | 1.240836042 | 1.240836042 | 8.37E-07   |
| unknown gene                                                                                   | NA                   | 1.242752754 | 1.242752754 | 1.15E-05   |
| glyceronephosphate O-acyltransferase                                                           | Gnpat                | 1.242856443 | 1.242856443 | 7.85E-05   |
| similar to WAP four-disulfide core 6-like 1                                                    | LOC685153            | 1.245176295 | 1.245176295 | 6.47E-06   |
| glutamic pyruvate transaminase (alanine aminotransferase) 2 (predicted)                        | Gpt2_predicted       | 1.24972126  | 1.24972126  | 0.00083915 |
| nucleophosmin 1                                                                                | Npm1                 | 1.250989073 | 1.250989073 | 2.37E-05   |
| similar to histone H2b-616 (predicted)                                                         | RGD1561543_predicted | 1.253795363 | 1.253795363 | 4.38E-05   |
| tripartite motif protein 36 (predicted)                                                        | Trim36_predicted     | 1.254242587 | 1.254242587 | 0.00028693 |
| urinary protein 2                                                                              | Rup2                 | 1.255033915 | 1.255033915 | 0.0001692  |
| epoxide hydrolase 2, cytoplasmic                                                               | Ephx2                | 1.261161644 | 1.261161644 | 1.42E-06   |
| phosphatidylserine-specific phospholipase A1                                                   | Pspla1               | 1.261326543 | 1.261326543 | 4.16E-05   |
| homocysteine-inducible, endoplasmic reticulum stress-inducible, ubiquitin-like domain member 1 | Herpud1              | 1.26489078  | 1.26489078  | 0.0002444  |
| eukaryotic translation initiation factor 1A                                                    | Eif1a                | 1.265117001 | 1.265117001 | 6.98E-05   |
| fibulin 2                                                                                      | Fbln2                | 1.26516699  | 1.26516699  | 0.00014931 |
| unknown gene                                                                                   | NA                   | 1.266104345 | 1.266104345 | 0.0014135  |
| similar to ovary-specific acidic protein                                                       | LOC689931            | 1.266839916 | 1.266839916 | 0.00124188 |
| unknown gene                                                                                   | NA                   | 1.27051151  | 1.27051151  | 6.58E-05   |
| biogenesis of lysosome-related organelles complex-1, subunit 2                                 | Bloc1s2              | 1.271433588 | 1.271433588 | 0.00070669 |
| unknown gene                                                                                   | NA                   | 1.272733624 | 1.272733624 | 1.51E-05   |

|                                                                                           |                      |             |             |            |
|-------------------------------------------------------------------------------------------|----------------------|-------------|-------------|------------|
| WAP four-disulfide core domain 3 (predicted)                                              | Wfdc3_predicted      | 1.275287802 | 1.275287802 | 4.29E-05   |
| calyculin binding protein                                                                 | Cacybp               | 1.278795837 | 1.278795837 | 2.03E-05   |
| cyclin G1                                                                                 | Ccng1                | 1.284210999 | 1.284210999 | 3.76E-06   |
| minichromosome maintenance deficient 10 (S. cerevisiae) (predicted)                       | Mcm10_predicted      | 1.284311804 | 1.284311804 | 1.57E-06   |
| crystallin, alpha B                                                                       | Cryab                | 1.285668277 | 1.285668277 | 0.00043989 |
| similar to Neural Wiskott-Aldrich syndrome protein (N-WASP)                               | LOC682507            | 1.296514423 | 1.296514423 | 4.67E-05   |
| nardilysin, N-arginine dibasic convertase 1                                               | Nrd1                 | 1.297729513 | 1.297729513 | 5.55E-05   |
| unknown gene                                                                              | NA                   | 1.29788691  | 1.29788691  | 6.51E-06   |
| RNA binding motif protein 3                                                               | Rbm3                 | 1.29816696  | 1.29816696  | 2.18E-05   |
| RAB30, member RAS oncogene family                                                         | Rab30                | 1.299642259 | 1.299642259 | 2.26E-06   |
| unknown gene                                                                              | NA                   | 1.300333491 | 1.300333491 | 0.00043382 |
| similar to erythroid differentiation-related factor 1 (predicted)                         | RGD1306820_predicted | 1.306016147 | 1.306016147 | 2.14E-05   |
| similar to RIKEN cDNA 2700002I20                                                          | RGD1307279           | 1.308567783 | 1.308567783 | 2.10E-06   |
| similar to Serine/threonine protein kinase 24 (predicted)                                 | RGD1561742_predicted | 1.310255261 | 1.310255261 | 5.95E-06   |
| unknown gene                                                                              | NA                   | 1.311692771 | 1.311692771 | 1.43E-05   |
| ATPase, Na <sup>+</sup> /K <sup>+</sup> transporting, beta 1 polypeptide                  | Atp1b1               | 1.312187361 | 1.312187361 | 1.55E-05   |
| unknown gene                                                                              | NA                   | 1.312748819 | 1.312748819 | 0.00021461 |
| amphoterin induced gene and ORF 3                                                         | Amigo3               | 1.316425311 | 1.316425311 | 0.00011691 |
| unknown gene                                                                              | NA                   | 1.31672522  | 1.31672522  | 0.00011136 |
| casein kinase II, alpha 1 polypeptide                                                     | Csnk2a1              | 1.320953127 | 1.320953127 | 1.85E-05   |
| acyl-Coenzyme A oxidase 2, branched chain                                                 | Acox2                | 1.323138179 | 1.323138179 | 3.00E-06   |
| acetyl-Coenzyme A acyltransferase 2 (mitochondrial 3-oxoacyl-Coenzyme A thiolase)         | Acaa2                | 1.323446194 | 1.323446194 | 5.73E-05   |
| similar to Beta-sarcoglycan (Beta-SG) (43 kDa dystrophin-associated glycoprotein) (43DAG) | LOC680229            | 1.323981272 | 1.323981272 | 0.01411096 |
| interleukin 1 receptor antagonist                                                         | Il1rn                | 1.325440642 | 1.325440642 | 3.19E-06   |
| similar to Aig1 protein (predicted)                                                       | RGD1562920_predicted | 1.32884464  | 1.32884464  | 2.95E-05   |
| synaptic vesicle glycoprotein 2b                                                          | Sv2b                 | 1.330377921 | 1.330377921 | 9.72E-06   |
| unknown gene                                                                              | NA                   | 1.33535085  | 1.33535085  | 1.91E-05   |
| similar to Protein C8orf4 (Thyroid cancer protein 1) (TC-1)                               | LOC684871            | 1.338086632 | 1.338086632 | 3.83E-05   |
| 6-phosphofructo-2-kinase/fructose-2,6-biphosphatase 1                                     | Pfkfb1               | 1.35083145  | 1.35083145  | 3.30E-05   |
| unknown gene                                                                              | NA                   | 1.356670001 | 1.356670001 | 0.00024968 |
| unknown gene                                                                              | NA                   | 1.359456869 | 1.359456869 | 0.00024078 |
| hydroxysteroid (17-beta) dehydrogenase 7                                                  | Hsd17b7              | 1.362274742 | 1.362274742 | 0.00013877 |
| gamma-glutamyl hydrolase                                                                  | Ggh                  | 1.365741486 | 1.365741486 | 4.83E-06   |
| peroxiredoxin 6                                                                           | Prdx6                | 1.36921022  | 1.36921022  | 0.0012333  |
| similar to Protein C6orf115                                                               | LOC685045            | 1.370037252 | 1.370037252 | 0.0002381  |
| unknown gene                                                                              | NA                   | 1.372147198 | 1.372147198 | 7.25E-06   |
| 3-hydroxy-3-methylglutaryl-Coenzyme A reductase                                           | Hmgcr                | 1.373227719 | 1.373227719 | 3.86E-06   |
| peptidylprolyl isomerase (cyclophilin)-like 3                                             | Ppil3                | 1.374797474 | 1.374797474 | 0.00014469 |
| unknown gene                                                                              | NA                   | 1.375217461 | 1.375217461 | 0.00140317 |
| leukocyte cell-derived chemotaxin 2 (predicted)                                           | Lect2_predicted      | 1.37922144  | 1.37922144  | 9.51E-06   |
| unknown gene                                                                              | NA                   | 1.382758156 | 1.382758156 | 0.00014114 |
| growth arrest specific 5                                                                  | Gas5                 | 1.384010224 | 1.384010224 | 3.94E-05   |
| protein tyrosine phosphatase, receptor type, G                                            | Ptprg                | 1.384312637 | 1.384312637 | 5.28E-05   |
| unknown gene                                                                              | NA                   | 1.386869036 | 1.386869036 | 2.29E-05   |
| similar to Acylphosphatase, muscle type isozyme (Acylphosphate phosphohydrolase)          | LOC682245            | 1.386930759 | 1.386930759 | 0.00092587 |
| alpha-fetoprotein                                                                         | Afp                  | 1.390933752 | 1.390933752 | 7.39E-05   |
| unknown gene                                                                              | NA                   | 1.395737728 | 1.395737728 | 0.00317308 |
| betaine-homocysteine methyltransferase                                                    | Bhmt                 | 1.402478325 | 1.402478325 | 2.18E-06   |
| SRY-box containing gene 17 (predicted)                                                    | Sox17_predicted      | 1.404969444 | 1.404969444 | 1.20E-05   |
| transferrin                                                                               | Tf                   | 1.410464257 | 1.410464257 | 0.00015474 |
| endothelial cell-specific molecule 1                                                      | Esm1                 | 1.413624422 | 1.413624422 | 2.77E-05   |
| cryptochrome 1 (photolyase-like)                                                          | Cry1                 | 1.414151925 | 1.414151925 | 1.48E-05   |
| unknown gene                                                                              | NA                   | 1.418031087 | 1.418031087 | 0.0028715  |
| similar to Eph receptor A4 (predicted)                                                    | RGD1560587_predicted | 1.422248504 | 1.422248504 | 0.00094969 |
| zinc finger protein 189 (predicted)                                                       | Zfp189_predicted     | 1.427737747 | 1.427737747 | 8.71E-06   |

|                                                                                                |                      |             |             |            |
|------------------------------------------------------------------------------------------------|----------------------|-------------|-------------|------------|
| nicotinamide N-methyltransferase (predicted)                                                   | Nmmt_predicted       | 1.431167962 | 1.431167962 | 4.39E-07   |
| unknown gene                                                                                   | NA                   | 1.43780869  | 1.43780869  | 1.11E-06   |
| citrate lyase beta like                                                                        | Clybl                | 1.442871504 | 1.442871504 | 0.00017167 |
| unknown gene                                                                                   | NA                   | 1.450626966 | 1.450626966 | 4.58E-05   |
| DNA-damage inducible transcript 3                                                              | Ddit3                | 1.453632495 | 1.453632495 | 0.00044353 |
| RGD1565641 (predicted)                                                                         | RGD1565641_predicted | 1.458584741 | 1.458584741 | 2.64E-05   |
| unknown gene                                                                                   | NA                   | 1.461717988 | 1.461717988 | 4.92E-07   |
| similar to ankyrin repeat and SOCs box-containing protein 5                                    | LOC361187            | 1.464193794 | 1.464193794 | 0.00027564 |
| similar to Pinin                                                                               | LOC368070            | 1.464841348 | 1.464841348 | 2.09E-06   |
| unknown gene                                                                                   | NA                   | 1.466596245 | 1.466596245 | 0.0010171  |
| abhydrolase domain containing 6                                                                | Abhd6                | 1.468792638 | 1.468792638 | 0.00032723 |
| signal-induced proliferation-associated 1 like 1                                               | Sipa1l1              | 1.46988464  | 1.46988464  | 0.00038402 |
| leucine rich repeat (in FLII) interacting protein 1                                            | Lrrfip1              | 1.471696547 | 1.471696547 | 0.00011498 |
| unknown gene                                                                                   | NA                   | 1.473084787 | 1.473084787 | 6.99E-05   |
| translocase of inner mitochondrial membrane 8 homolog a (yeast)                                | Timm8a               | 1.474703136 | 1.474703136 | 3.13E-06   |
| unknown gene                                                                                   | NA                   | 1.476394481 | 1.476394481 | 0.00074648 |
| eukaryotic translation initiation factor 1A                                                    | Eif1a                | 1.479048793 | 1.479048793 | 0.00014451 |
| unknown gene                                                                                   | NA                   | 1.479716033 | 1.479716033 | 0.00167822 |
| regulator of G-protein signaling 5                                                             | Rgs5                 | 1.487937321 | 1.487937321 | 0.00017314 |
| unknown gene                                                                                   | NA                   | 1.491104958 | 1.491104958 | 1.50E-05   |
| transformation related protein 53 inducible nuclear protein 1                                  | Trp53inp1            | 1.492753585 | 1.492753585 | 4.50E-05   |
| hypothetical protein LOC685545                                                                 | LOC685545            | 1.492996254 | 1.492996254 | 0.00011459 |
| similar to RIKEN cDNA 2810055F11 (predicted)                                                   | RGD1305721_predicted | 1.506778262 | 1.506778262 | 3.29E-06   |
| unknown gene                                                                                   | NA                   | 1.512892374 | 1.512892374 | 0.00091641 |
| heat shock protein 1, alpha                                                                    | Hspca                | 1.514701928 | 1.514701928 | 3.21E-06   |
| G0/G1 switch gene 2                                                                            | G0s2                 | 1.52725748  | 1.52725748  | 6.09E-06   |
| prominin 1                                                                                     | Prom1                | 1.534840912 | 1.534840912 | 3.16E-05   |
| unknown gene                                                                                   | NA                   | 1.536127042 | 1.536127042 | 0.00332201 |
| unknown gene                                                                                   | NA                   | 1.5405141   | 1.5405141   | 1.97E-05   |
| hypothetical protein LOC685888                                                                 | LOC685888            | 1.54527686  | 1.54527686  | 2.51E-05   |
| unknown gene                                                                                   | NA                   | 1.546274471 | 1.546274471 | 9.99E-05   |
| unknown gene                                                                                   | NA                   | 1.549847101 | 1.549847101 | 0.00019722 |
| unknown gene                                                                                   | NA                   | 1.550203284 | 1.550203284 | 9.86E-06   |
| protein C receptor, endothelial                                                                | Procr                | 1.551327557 | 1.551327557 | 3.43E-05   |
| TSC22 domain family 3                                                                          | Tsc22d3              | 1.552693128 | 1.552693128 | 9.36E-07   |
| heat shock 105kDa/110kDa protein 1                                                             | Hsph1                | 1.553150402 | 1.553150402 | 2.47E-06   |
| unknown gene                                                                                   | NA                   | 1.554043768 | 1.554043768 | 4.62E-05   |
| decorin                                                                                        | Den                  | 1.559298048 | 1.559298048 | 7.43E-05   |
| heterogeneous nuclear ribonucleoprotein A1                                                     | Hnrpa1               | 1.563940158 | 1.563940158 | 4.73E-05   |
| unknown gene                                                                                   | NA                   | 1.567997264 | 1.567997264 | 0.00057655 |
| mitochondrial acyl-CoA thioesterase 1                                                          | Mte1                 | 1.571402665 | 1.571402665 | 9.22E-05   |
| unknown gene                                                                                   | NA                   | 1.575146561 | 1.575146561 | 1.12E-07   |
| aconitase 2, mitochondrial                                                                     | Aco2                 | 1.575802698 | 1.575802698 | 0.0008149  |
| zinc finger protein 354A                                                                       | Zfp354a              | 1.577204117 | 1.577204117 | 9.65E-06   |
| transmembrane protein 33                                                                       | Tmem33               | 1.586324475 | 1.586324475 | 6.23E-05   |
| nuclear factor of kappa light polypeptide gene enhancer in B-cells inhibitor, zeta (predicted) | Nfkbiz_predicted     | 1.591639137 | 1.591639137 | 4.25E-06   |
| unknown gene                                                                                   | NA                   | 1.593776996 | 1.593776996 | 2.91E-05   |
| dehydrodolichyl diphosphate synthase                                                           | Dhdds                | 1.597165723 | 1.597165723 | 7.07E-07   |
| similar to RIKEN cDNA 2410005O16                                                               | LOC500419            | 1.597258633 | 1.597258633 | 0.0004094  |
| unknown gene                                                                                   | NA                   | 1.604598235 | 1.604598235 | 8.51E-06   |
| periplakin (predicted)                                                                         | Ppl_predicted        | 1.605080382 | 1.605080382 | 0.00178737 |
| fatty acid binding protein 2, intestinal                                                       | Fabp2                | 1.61039051  | 1.61039051  | 0.00025119 |
| ladinin (predicted)                                                                            | Lad1_predicted       | 1.61090444  | 1.61090444  | 4.51E-05   |
| nuclear ubiquitous casein kinase and cyclin-dependent kinase substrate                         | Nucks                | 1.614455371 | 1.614455371 | 3.75E-06   |
| unknown gene                                                                                   | NA                   | 1.615869641 | 1.615869641 | 0.00079996 |

|                                                                                             |                      |             |             |            |
|---------------------------------------------------------------------------------------------|----------------------|-------------|-------------|------------|
| claudin 1                                                                                   | Cldn1                | 1.630574366 | 1.630574366 | 6.16E-05   |
| similar to RIKEN cDNA A030007L17; EST AA673177 (predicted)                                  | RGD1304876_predicted | 1.630634685 | 1.630634685 | 0.00036676 |
| methylthioadenosine phosphorylase (predicted)                                               | Mtap_predicted       | 1.632184182 | 1.632184182 | 0.00070725 |
| hypothetical protein LOC619558                                                              | LOC619558            | 1.634955465 | 1.634955465 | 3.59E-07   |
| similar to Sulfide:quinone oxidoreductase, mitochondrial precursor                          | LOC691966            | 1.636781253 | 1.636781253 | 2.32E-05   |
| similar to RIKEN cDNA 1700023M03                                                            | RGD1305457           | 1.637290214 | 1.637290214 | 0.00023494 |
| transmembrane protein 2 (predicted)                                                         | Tmem2_predicted      | 1.637691528 | 1.637691528 | 0.00061115 |
| glutamic pyruvic transaminase 1, soluble                                                    | Gpt1                 | 1.643504375 | 1.643504375 | 1.04E-06   |
| ubiquitin specific peptidase 18                                                             | Usp18                | 1.645804146 | 1.645804146 | 2.36E-05   |
| chemokine (C-C motif) ligand 2                                                              | Ccl2                 | 1.648038909 | 1.648038909 | 4.39E-07   |
| unknown gene                                                                                | NA                   | 1.655357908 | 1.655357908 | 6.83E-05   |
| hypoxanthine guanine phosphoribosyl transferase                                             | Hprt                 | 1.660629888 | 1.660629888 | 0.0002004  |
| dynamitin 1-like                                                                            | Dnm11                | 1.664549844 | 1.664549844 | 0.00037899 |
| similar to Beta-sarcoglycan (Beta-SG) (43 kDa dystrophin-associated glycoprotein) (43DAG)   | LOC680229            | 1.667101012 | 1.667101012 | 0.00211447 |
| aldo-keto reductase family 1, member B7                                                     | Akr1b7               | 1.681685796 | 1.681685796 | 2.00E-06   |
| electron-transfer-flavoprotein, beta polypeptide                                            | Etfb                 | 1.698290226 | 1.698290226 | 0.00037419 |
| dodecenoyl-coenzyme A delta isomerase                                                       | Dci                  | 1.705401022 | 1.705401022 | 2.16E-06   |
| similar to mKIAA0212 protein (predicted)                                                    | RGD1563633_predicted | 1.707636061 | 1.707636061 | 1.73E-05   |
| myo-inositol oxygenase                                                                      | Miox                 | 1.710988048 | 1.710988048 | 9.26E-05   |
| NudC domain containing 1 (predicted)                                                        | Nudcd1_predicted     | 1.71444008  | 1.71444008  | 9.11E-05   |
| ATPase, Na <sup>+</sup> /K <sup>+</sup> transporting, beta 1 polypeptide                    | Atp1b1               | 1.715660953 | 1.715660953 | 3.89E-05   |
| unknown gene                                                                                | NA                   | 1.731220099 | 1.731220099 | 6.24E-06   |
| cysteine-rich with EGF-like domains 2                                                       | Crel2                | 1.740860288 | 1.740860288 | 6.41E-07   |
| unknown gene                                                                                | NA                   | 1.758754145 | 1.758754145 | 3.07E-05   |
| UDP-Gal:betaGlcNAc beta 1,3-galactosyltransferase, polypeptide 3                            | B3galt3              | 1.759100384 | 1.759100384 | 4.58E-07   |
| ubiquitin specific peptidase 33                                                             | Usp33                | 1.76953683  | 1.76953683  | 3.48E-05   |
| cell growth regulator with EF hand domain 1                                                 | Cgref1               | 1.771025339 | 1.771025339 | 0.00044924 |
| zinc finger protein 655                                                                     | Zfp655               | 1.776171026 | 1.776171026 | 1.16E-06   |
| glutamate oxaloacetate transaminase 1                                                       | Got1                 | 1.779272474 | 1.779272474 | 6.86E-07   |
| rat senescence marker protein 2A gene, exons 1 and 2                                        | Smp2a                | 1.788123894 | 1.788123894 | 3.02E-06   |
| similar to TSC22 domain family protein 2 (TSC22-related-inducible leucine zipper protein 4) | LOC499624            | 1.78858305  | 1.78858305  | 0.00075344 |
| osteomodulin                                                                                | Omd                  | 1.802602079 | 1.802602079 | 2.78E-06   |
| unknown gene                                                                                | NA                   | 1.814129766 | 1.814129766 | 0.0002064  |
| similar to mKIAA0212 protein (predicted)                                                    | RGD1563633_predicted | 1.83654004  | 1.83654004  | 4.08E-08   |
| unknown gene                                                                                | NA                   | 1.837351575 | 1.837351575 | 1.97E-05   |
| unknown gene                                                                                | NA                   | 1.846754167 | 1.846754167 | 3.58E-06   |
| far upstream element (FUSE) binding protein 1                                               | Fubp1                | 1.852315648 | 1.852315648 | 2.75E-05   |
| protein disulfide isomerase associated 3                                                    | Pdia3                | 1.882655826 | 1.882655826 | 5.63E-05   |
| interferon-related developmental regulator 1                                                | Ifrd1                | 1.904888896 | 1.904888896 | 3.61E-05   |
| myxovirus (influenza virus) resistance 2                                                    | Mx2                  | 1.932624983 | 1.932624983 | 6.15E-05   |
| microtubule-associated protein 1 light chain 3 beta                                         | Map1lc3b             | 1.941365012 | 1.941365012 | 5.84E-07   |
| connective tissue growth factor                                                             | Ctgf                 | 1.944440011 | 1.944440011 | 0.00050316 |
| transferrin receptor                                                                        | Tfrc                 | 1.94931939  | 1.94931939  | 8.01E-08   |
| development and differentiation enhancing (predicted)                                       | Ddef1_predicted      | 1.965627031 | 1.965627031 | 1.40E-06   |
| hepcidin antimicrobial peptide                                                              | Hamp                 | 1.989567055 | 1.989567055 | 3.63E-07   |
| regulator of G-protein signaling 4                                                          | Rgs4                 | 2.00125496  | 2.00125496  | 0.0001261  |
| unknown gene                                                                                | NA                   | 2.01368737  | 2.01368737  | 0.00064572 |
| heat shock 105kDa/110kDa protein 1                                                          | Hsph1                | 2.026892311 | 2.026892311 | 5.55E-05   |
| unknown gene                                                                                | NA                   | 2.03244598  | 2.03244598  | 6.98E-05   |
| cytochrome P450, family 17, subfamily a, polypeptide 1                                      | Cyp17a1              | 2.036698286 | 2.036698286 | 8.83E-06   |
| similar to myoferlin isoform b                                                              | LOC679806            | 2.054601651 | 2.054601651 | 0.00014703 |
| deoxyribonuclease II beta                                                                   | Dnase2b              | 2.083545102 | 2.083545102 | 0.00074556 |
| rhomboid, veinlet-like 7 (Drosophila) (predicted)                                           | Rhbdl7_predicted     | 2.101102481 | 2.101102481 | 2.98E-05   |
| similar to mKIAA0212 protein (predicted)                                                    | RGD1563633_predicted | 2.109889005 | 2.109889005 | 4.43E-05   |
| transmembrane protein 55A                                                                   | Tmem55a              | 2.110685812 | 2.110685812 | 1.47E-05   |

|                                                                                                  |                      |             |             |            |
|--------------------------------------------------------------------------------------------------|----------------------|-------------|-------------|------------|
| similar to hypothetical protein D4Ert89e                                                         | RGD1305703           | 2.11792085  | 2.11792085  | 1.57E-05   |
| similar to hypothetical protein MGC52110 (predicted)                                             | RGD1565095_predicted | 2.127176075 | 2.127176075 | 3.63E-05   |
| unknown gene                                                                                     | NA                   | 2.149567461 | 2.149567461 | 1.85E-05   |
| aspartyl aminopeptidase                                                                          | Dnpep                | 2.152869924 | 2.152869924 | 6.06E-05   |
| hypothetical LOC300207 (predicted)                                                               | RGD1305928_predicted | 2.167194402 | 2.167194402 | 2.80E-05   |
| transmembrane protein 55A                                                                        | Tmem55a              | 2.168095172 | 2.168095172 | 1.47E-06   |
| thrombospondin 1                                                                                 | Thbs1                | 2.197295176 | 2.197295176 | 0.00311051 |
| FK506 binding protein 5                                                                          | Fkbp5                | 2.206630299 | 2.206630299 | 0.00010203 |
| neuropeptide Y                                                                                   | Npy                  | 2.223461673 | 2.223461673 | 3.62E-06   |
| similar to expressed sequence AW413625 (predicted)                                               | RGD1560913_predicted | 2.239714185 | 2.239714185 | 4.96E-09   |
| acetyl-Coenzyme A acetyltransferase 2                                                            | Acat2                | 2.242655328 | 2.242655328 | 5.21E-05   |
| thrombospondin 1                                                                                 | Thbs1                | 2.287819048 | 2.287819048 | 1.82E-05   |
| unknown gene                                                                                     | NA                   | 2.32118446  | 2.32118446  | 2.40E-07   |
| RT1 class I, CE12                                                                                | RT1-CE12             | 2.346089474 | 2.346089474 | 2.74E-06   |
| odorant binding protein 1 f                                                                      | Obp1f                | 2.359137951 | 2.359137951 | 1.22E-05   |
| transferrin receptor                                                                             | Tfrc                 | 2.395368817 | 2.395368817 | 1.27E-05   |
| regulator of G-protein signaling 4                                                               | Rgs4                 | 2.418139144 | 2.418139144 | 0.00036244 |
| FK506 binding protein 5                                                                          | Fkbp5                | 2.479391841 | 2.479391841 | 5.86E-07   |
| unknown gene                                                                                     | NA                   | 2.55266562  | 2.55266562  | 0.00014176 |
| bromodomain adjacent to zinc finger domain protein 1B                                            | Baz1b                | 2.565138961 | 2.565138961 | 6.52E-07   |
| hypothetical LOC298504 (predicted)                                                               | RGD1310174_predicted | 2.567244108 | 2.567244108 | 1.15E-06   |
| cell death-inducing DNA fragmentation factor, alpha subunit-like effector A (predicted)          | Cidea_predicted      | 2.610136176 | 2.610136176 | 1.53E-06   |
| similar to Protein diaphanous homolog 3 (Diaphanous-related formin-3) (DRF3) (mDIA2) (p134mDIA2) | LOC290396            | 2.74700457  | 2.74700457  | 4.11E-05   |
| period homolog 2 (Drosophila)                                                                    | Per2                 | 2.752665021 | 2.752665021 | 2.74E-06   |
| solute carrier family 5 (sodium/glucose cotransporter), member 11                                | Slc5a11              | 2.828754605 | 2.828754605 | 0.00042452 |
| ubiquitin specific peptidase 2                                                                   | Usp2                 | 2.844572356 | 2.844572356 | 2.26E-07   |
| interferon, alpha-inducible protein (clone IFI-15K) (predicted)                                  | G1p2_predicted       | 2.94206362  | 2.94206362  | 3.17E-07   |
| major urinary protein 5                                                                          | Mup5                 | 2.946149683 | 2.946149683 | 6.10E-05   |
| guanylate cyclase 2C                                                                             | Gucy2c               | 2.982155248 | 2.982155248 | 5.01E-06   |
| similar to MASK-4E-BP3 protein                                                                   | LOC679725            | 3.074508418 | 3.074508418 | 1.20E-06   |
| phospholipase A2, group XIA (predicted)                                                          | Pla2g12a_predicted   | 3.095135913 | 3.095135913 | 1.28E-06   |
| unknown gene                                                                                     | NA                   | 3.159748469 | 3.159748469 | 1.17E-07   |
| fatty acid binding protein 4, adipocyte                                                          | Fabp4                | 3.330785557 | 3.330785557 | 1.05E-06   |
| unknown gene                                                                                     | NA                   | 3.337559077 | 3.337559077 | 4.35E-06   |
| major urinary protein 5                                                                          | Mup5                 | 3.505184594 | 3.505184594 | 6.15E-06   |
| similar to retinoid binding protein 7 (predicted)                                                | RGD1562168_predicted | 3.582798178 | 3.582798178 | 0.00052251 |
| hypothetical protein LOC680687                                                                   | LOC680687            | 3.91474711  | 3.91474711  | 9.85E-05   |
| calcium-sensing receptor like 1                                                                  | Casr1l               | 4.073699664 | 4.073699664 | 2.26E-06   |
| RT1 class Ib gene, H2-TL-like, grc region (N1)                                                   | RT1-N1               | 4.31118505  | 4.31118505  | 1.11E-06   |
| unknown gene                                                                                     | NA                   | 4.587307215 | 4.587307215 | 8.53E-08   |
| carboxylesterase 2 (intestine, liver)                                                            | Ces2                 | 5.096243081 | 5.096243081 | 1.31E-06   |
| aldehyde dehydrogenase family 1, subfamily A4                                                    | Aldh1a4              | 5.177644748 | 5.177644748 | 1.96E-08   |
| <u>alpha-2-macroglobulin</u>                                                                     | A2m                  | 6.153903954 | 6.153903954 | 2.81E-06   |

\* Genes up- or down-regulated by over 2-fold are shown.
